# Supplementary material for: Identification of Novel Thyroid Cancer-Related Genes and Chemicals Using Shortest Path Algorithm
Source: Hindawi journal article supplement (doi:10.1155/2015/964795), 2015-01-01
Supplement: f1 [file 964795.f1.zip]

**Online Supporting Information S2.** 636 candidate genes and 174 candidate chemicals with betweenness larger than zero and their permutation FDRs

| Gene or chemical ID | Gene or chemical name | Betweenness | Permutation FDR |
|---------------------|-----------------------|-------------|-----------------|
| ENSP00000206249     | ESR1                  | 21841       | 0               |
| ENSP00000226574     | NFKB1                 | 963         | 0               |
| ENSP00000227507     | CCND1                 | 6321        | 0               |
| ENSP00000259526     | NOV                   | 482         | 0               |
| ENSP00000263851     | IL7                   | 482         | 0               |
| ENSP00000268655     | ZNF174                | 1           | 0               |
| ENSP00000269138     | SS18                  | 963         | 0               |
| ENSP00000295108     | NEUROD1               | 482         | 0               |
| ENSP00000301012     | MVD                   | 482         | 0               |
| ENSP00000302640     | UBTF                  | 482         | 0               |
| ENSP00000302648     | NRTN                  | 482         | 0               |
| ENSP00000304811     | UGT2B7                | 963         | 0               |
| ENSP00000306157     | IL7R                  | 482         | 0               |
| ENSP00000327213     | NRIP1                 | 963         | 0               |
| ENSP00000334181     | KDM4D                 | 482         | 0               |
| ENSP00000337915     | CYP3A4                | 4122        | 0               |
| ENSP00000349508     | CHD4                  | 482         | 0               |
| ENSP00000360973     | AGTR2                 | 482         | 0               |
| ENSP00000368066     | HAO1                  | 482         | 0               |

|                 |         |      |       |
|-----------------|---------|------|-------|
| ENSP00000368981 | SLC35B3 | 482  | 0     |
| ENSP00000377941 | ACTN1   | 962  | 0     |
| ENSP00000262809 | ELL     | 482  | 0.001 |
| ENSP00000270349 | SLC6A3  | 956  | 0.001 |
| ENSP00000295408 | MERTK   | 962  | 0.001 |
| ENSP00000338207 | LMO1    | 482  | 0.001 |
| ENSP00000346015 | RPL27A  | 477  | 0.001 |
| ENSP00000348089 | ERCC6   | 482  | 0.001 |
| ENSP00000357255 | BGLAP   | 482  | 0.001 |
| ENSP00000368754 | BAZ2A   | 482  | 0.001 |
| ENSP00000369396 | SLC4A11 | 482  | 0.001 |
| ENSP00000416387 | FBLIM1  | 43   | 0.001 |
| ENSP00000011684 | PLEKHG6 | 482  | 0.002 |
| ENSP00000262367 | CREBBP  | 5560 | 0.002 |
| ENSP00000276297 | DLC1    | 482  | 0.002 |
| ENSP00000327246 | VIPR1   | 476  | 0.002 |
| ENSP00000331358 | GAST    | 997  | 0.002 |
| ENSP00000335544 | CCKBR   | 696  | 0.002 |
| ENSP00000351605 | FZD6    | 482  | 0.002 |
| ENSP00000362690 | NR5A1   | 482  | 0.002 |
| ENSP00000371532 | VLDLR   | 494  | 0.002 |
| ENSP00000380514 | HAGH    | 3    | 0.002 |

|                 |           |      |       |
|-----------------|-----------|------|-------|
| ENSP00000391998 | ARTN      | 482  | 0.002 |
| ENSP00000397297 | NTF3      | 484  | 0.002 |
| ENSP00000274565 | SPINK7    | 482  | 0.003 |
| ENSP00000290330 | SNF8      | 482  | 0.003 |
| ENSP00000370748 | IDI1      | 482  | 0.003 |
| ENSP00000417763 | NAA10     | 482  | 0.003 |
| ENSP00000253339 | LATS1     | 482  | 0.004 |
| ENSP00000331288 | TMEM173   | 482  | 0.004 |
| ENSP00000269485 | TNFRSF11A | 962  | 0.005 |
| ENSP00000284818 | LY96      | 962  | 0.005 |
| ENSP00000323328 | SIGLEC7   | 478  | 0.005 |
| ENSP00000339151 | IKBKB     | 501  | 0.005 |
| ENSP00000344741 | INSIG1    | 482  | 0.005 |
| ENSP00000244007 | PLCG1     | 2851 | 0.006 |
| ENSP00000263208 | HIRA      | 482  | 0.006 |
| ENSP00000304169 | PITX2     | 482  | 0.006 |
| ENSP00000380033 | DDX17     | 482  | 0.006 |
| ENSP00000410294 | FGFR2     | 964  | 0.006 |
| ENSP00000227163 | SPI1      | 482  | 0.007 |
| ENSP00000279247 | CAPN1     | 470  | 0.007 |
| ENSP00000322142 | ING5      | 482  | 0.007 |
| ENSP00000401303 | SHC1      | 2222 | 0.007 |

|                 |         |      |       |
|-----------------|---------|------|-------|
| ENSP00000241052 | CAT     | 483  | 0.008 |
| ENSP00000245157 | BBS2    | 954  | 0.008 |
| ENSP00000346566 | CKAP5   | 482  | 0.008 |
| ENSP00000249373 | SMO     | 482  | 0.009 |
| ENSP00000250003 | MYOD1   | 2392 | 0.009 |
| ENSP00000279387 | PPP4C   | 482  | 0.009 |
| ENSP00000296028 | PPBP    | 3    | 0.009 |
| ENSP00000320378 | SLC7A8  | 474  | 0.009 |
| ENSP00000342278 | OAS2    | 481  | 0.009 |
| ENSP00000367802 | TAF1C   | 482  | 0.009 |
| ENSP00000415183 | MUC2    | 482  | 0.009 |
| ENSP00000228837 | FGF6    | 1434 | 0.01  |
| ENSP00000230050 | RPS12   | 481  | 0.01  |
| ENSP00000236147 | SELL    | 482  | 0.01  |
| ENSP00000306866 | GABARAP | 482  | 0.01  |
| ENSP00000276414 | GNRH1   | 962  | 0.011 |
| ENSP00000304669 | CTNNA1  | 969  | 0.011 |
| ENSP00000346879 | NKX2-1  | 482  | 0.011 |
| ENSP00000361965 | ADA     | 482  | 0.011 |
| ENSP00000364737 | CENPP   | 481  | 0.011 |
| ENSP00000387662 | GCG     | 1444 | 0.011 |
| ENSP00000304408 | COL3A1  | 482  | 0.012 |

|                 |         |      |       |
|-----------------|---------|------|-------|
| ENSP00000304915 | IL13    | 482  | 0.012 |
| ENSP00000294304 | LRP5    | 482  | 0.013 |
| ENSP00000312017 | FAM57A  | 1    | 0.013 |
| ENSP00000242067 | BBS9    | 482  | 0.014 |
| ENSP00000338345 | SNCA    | 1217 | 0.014 |
| ENSP00000244926 | SCGB1D2 | 481  | 0.015 |
| ENSP00000265773 | SMARCA2 | 962  | 0.015 |
| ENSP00000268057 | BBS4    | 474  | 0.016 |
| ENSP00000315130 | CLU     | 481  | 0.016 |
| ENSP00000356024 | CR2     | 667  | 0.016 |
| ENSP00000360025 | GADD45A | 482  | 0.017 |
| ENSP00000355759 | PARP1   | 1441 | 0.018 |
| ENSP00000222382 | CYP3A43 | 89   | 0.019 |
| ENSP00000256857 | GRP     | 975  | 0.019 |
| ENSP00000346032 | ANXA2   | 482  | 0.019 |
| ENSP00000374280 | RTF1    | 482  | 0.019 |
| ENSP00000216267 | BRD1    | 1    | 0.02  |
| ENSP00000221265 | PAF1    | 850  | 0.02  |
| ENSP00000260682 | CYP2C9  | 502  | 0.02  |
| ENSP00000367316 | ITGA8   | 1144 | 0.02  |
| ENSP00000168712 | FGF4    | 6    | 0.021 |
| ENSP00000268171 | FURIN   | 482  | 0.021 |

|                 |          |      |       |
|-----------------|----------|------|-------|
| ENSP00000338799 | IL6ST    | 1126 | 0.022 |
| ENSP00000363548 | CXCL12   | 482  | 0.022 |
| ENSP00000225698 | C1QBP    | 482  | 0.023 |
| ENSP00000305422 | CEBPB    | 220  | 0.023 |
| ENSP00000308208 | MMP14    | 4    | 0.023 |
| ENSP00000365435 | TNFRSF1B | 482  | 0.023 |
| ENSP00000367299 | VPS36    | 482  | 0.023 |
| ENSP00000296785 | ANKRA2   | 13   | 0.024 |
| ENSP00000363089 | TLR4     | 962  | 0.024 |
| ENSP00000309968 | ADAM17   | 480  | 0.025 |
| ENSP00000342143 | PDZK1    | 481  | 0.025 |
| ENSP00000349887 | ASNA1    | 478  | 0.025 |
| ENSP00000231509 | NR3C1    | 2843 | 0.026 |
| ENSP00000296674 | RPS23    | 457  | 0.026 |
| ENSP00000355518 | FH       | 304  | 0.027 |
| ENSP00000227752 | IL10RA   | 482  | 0.029 |
| ENSP00000407375 | GPX1     | 482  | 0.03  |
| ENSP00000259512 | DERL1    | 482  | 0.031 |
| ENSP00000300161 | YWHAB    | 958  | 0.031 |
| ENSP00000356070 | MAPKAPK2 | 961  | 0.031 |
| ENSP00000003100 | CYP51A1  | 1    | 0.032 |
| ENSP00000262965 | TCF3     | 964  | 0.032 |

|                 |         |      |       |
|-----------------|---------|------|-------|
| ENSP00000300134 | STAT6   | 1291 | 0.032 |
| ENSP00000155840 | KCNQ1   | 482  | 0.033 |
| ENSP00000263734 | EPAS1   | 39   | 0.033 |
| ENSP00000342952 | ADCY2   | 1059 | 0.033 |
| ENSP00000363998 | ITCH    | 955  | 0.033 |
| ENSP00000256078 | KRAS    | 341  | 0.034 |
| ENSP00000287820 | PPARG   | 2238 | 0.034 |
| ENSP00000296509 | MAD2L1  | 482  | 0.034 |
| ENSP00000419879 | CDS2    | 1    | 0.035 |
| ENSP00000338964 | GGT7    | 1    | 0.036 |
| ENSP00000373614 | SELPLG  | 482  | 0.036 |
| ENSP00000365682 | TLE1    | 482  | 0.037 |
| ENSP00000229595 | ASF1A   | 482  | 0.038 |
| ENSP00000240618 | KLRK1   | 482  | 0.039 |
| ENSP00000261167 | WBP11   | 1    | 0.039 |
| ENSP00000294728 | VCAM1   | 14   | 0.039 |
| ENSP00000308845 | MRPS12  | 1    | 0.039 |
| ENSP00000332353 | PTCH1   | 1438 | 0.039 |
| ENSP00000220809 | PLAT    | 482  | 0.04  |
| ENSP00000245907 | C3      | 962  | 0.04  |
| ENSP00000331736 | SELE    | 1    | 0.04  |
| ENSP00000283131 | SMARCA5 | 482  | 0.041 |

|                 |          |      |       |
|-----------------|----------|------|-------|
| ENSP00000312652 | LEP      | 1360 | 0.041 |
| ENSP00000324648 | CYP2B6   | 509  | 0.043 |
| ENSP00000359998 | GSTA4    | 10   | 0.043 |
| ENSP00000316054 | DVL3     | 482  | 0.044 |
| ENSP00000329967 | TBK1     | 951  | 0.044 |
| ENSP00000352272 | MYOZ1    | 481  | 0.044 |
| ENSP00000262077 | NUP153   | 482  | 0.045 |
| ENSP00000263645 | CD81     | 36   | 0.045 |
| ENSP00000297268 | COL1A2   | 482  | 0.045 |
| ENSP00000268296 | ITGAX    | 6    | 0.046 |
| ENSP00000351407 | ARNT     | 1300 | 0.046 |
| ENSP00000010338 | TRAF3IP3 | 482  | 0.047 |
| ENSP00000248244 | TICAM1   | 480  | 0.047 |
| ENSP00000331487 | NPLOC4   | 473  | 0.047 |
| ENSP00000320180 | GHRHR    | 472  | 0.048 |
| ENSP00000338018 | HIF1A    | 6169 | 0.048 |
| ENSP00000340944 | PTPN11   | 1219 | 0.048 |
| ENSP00000366565 | VPS28    | 482  | 0.049 |
| ENSP00000290649 | AMFR     | 482  | 0.05  |
| ENSP00000251772 | PLXNA1   | 1    | 0.051 |
| ENSP00000300589 | NOD2     | 3    | 0.051 |
| ENSP00000170630 | IL4R     | 815  | 0.052 |



|                 |           |      |       |
|-----------------|-----------|------|-------|
| ENSP00000232458 | ECT2      | 5    | 0.052 |
| ENSP00000236850 | APOA1     | 1846 | 0.053 |
| ENSP00000216181 | MYH9      | 1    | 0.054 |
| ENSP00000264708 | POMC      | 1847 | 0.054 |
| ENSP00000295731 | IHH       | 8    | 0.054 |
| ENSP00000310551 | LCLAT1    | 1    | 0.056 |
| ENSP00000354612 | PTGS1     | 648  | 0.056 |
| ENSP00000303242 | ITGB2     | 1356 | 0.057 |
| ENSP00000316176 | UBE2N     | 482  | 0.057 |
| ENSP00000250416 | PARP2     | 481  | 0.058 |
| ENSP00000311364 | MUCL1     | 481  | 0.058 |
| ENSP00000326550 | TACC3     | 482  | 0.058 |
| ENSP00000226218 | VTN SEBOX | 50   | 0.06  |
| ENSP00000382342 | ABCC1     | 461  | 0.062 |
| ENSP00000220592 | AGO2      | 408  | 0.063 |
| ENSP00000227918 | SCGB2A2   | 481  | 0.063 |
| ENSP00000263686 | SELP      | 957  | 0.064 |
| ENSP00000282441 | YAP1      | 482  | 0.064 |
| ENSP00000301149 | GPD1      | 2    | 0.064 |
| ENSP00000262133 | RBL2      | 6    | 0.065 |
| ENSP00000273430 | AGTR1     | 929  | 0.065 |
| ENSP00000287497 | ITGAM     | 888  | 0.066 |

|                 |         |      |       |
|-----------------|---------|------|-------|
| ENSP00000295683 | CXCR1   | 3    | 0.067 |
| ENSP00000221930 | TGFB1   | 1758 | 0.068 |
| ENSP00000339007 | GRB2    | 5685 | 0.068 |
| ENSP00000216797 | NFKBIA  | 552  | 0.069 |
| ENSP00000355231 | BECN1   | 482  | 0.069 |
| ENSP00000260731 | KIF11   | 482  | 0.071 |
| ENSP00000380349 | CAPN3   | 12   | 0.071 |
| ENSP00000264968 | MGAT4A  | 9    | 0.072 |
| ENSP00000324856 | STK11   | 482  | 0.073 |
| ENSP00000333194 | RGS19   | 3    | 0.074 |
| ENSP00000360372 | CYP2C19 | 122  | 0.074 |
| ENSP00000300651 | MED1    | 992  | 0.075 |
| ENSP00000245919 | FOSB    | 277  | 0.076 |
| ENSP00000362166 | MEAF6   | 481  | 0.078 |
| ENSP00000254480 | SMARCC1 | 736  | 0.079 |
| ENSP00000253401 | ARHGEF9 | 1    | 0.081 |
| ENSP00000261973 | RBM25   | 480  | 0.081 |
| ENSP00000264499 | BBS7    | 1    | 0.083 |
| ENSP00000250617 | ARHGEF6 | 339  | 0.085 |
| ENSP00000253188 | SLC7A10 | 6    | 0.086 |
| ENSP00000293379 | ITGA5   | 1893 | 0.086 |
| ENSP00000348784 | IGBP1   | 482  | 0.086 |

|                 |          |       |       |
|-----------------|----------|-------|-------|
| ENSP00000335153 | HSP90AA1 | 17385 | 0.087 |
| ENSP00000384273 | RELA     | 1745  | 0.087 |
| ENSP00000250448 | FOXA1    | 479   | 0.091 |
| ENSP00000253024 | TRIM28   | 482   | 0.091 |
| ENSP00000302021 | MUC7     | 1     | 0.092 |
| ENSP00000314949 | POLR2A   | 1939  | 0.092 |
| ENSP00000285930 | AKR1B1   | 430   | 0.093 |
| ENSP00000260356 | THBS1    | 10    | 0.094 |
| ENSP00000281453 | CENPU    | 481   | 0.094 |
| ENSP00000211122 | GSTA3    | 2     | 0.096 |
| ENSP00000364094 | ITGB1    | 2172  | 0.097 |
| ENSP00000369213 | DDX58    | 1187  | 0.099 |
| ENSP00000341268 | TRADD    | 9     | 0.101 |
| ENSP00000358301 | ADRB1    | 12    | 0.101 |
| ENSP00000222254 | PIK3R2   | 6     | 0.103 |
| ENSP00000340698 | GIPC1    | 444   | 0.103 |
| ENSP00000342056 | CS       | 1     | 0.103 |
| ENSP00000343204 | JAK1     | 1161  | 0.103 |
| ENSP00000359206 | BTRC     | 207   | 0.103 |
| ENSP00000294339 | TAL1     | 482   | 0.104 |
| ENSP00000392423 | RELN     | 369   | 0.104 |
| ENSP00000216223 | IL2RB    | 646   | 0.105 |

|                 |         |      |       |
|-----------------|---------|------|-------|
| ENSP00000306397 | UQCRFS1 | 30   | 0.105 |
| ENSP00000221130 | GSR     | 3    | 0.109 |
| ENSP00000278823 | MTA2    | 1    | 0.109 |
| ENSP00000400591 | SNRPE   | 122  | 0.109 |
| ENSP00000390500 | STK3    | 362  | 0.11  |
| ENSP00000264554 | SHC2    | 424  | 0.111 |
| ENSP00000361125 | VEGFA   | 1442 | 0.111 |
| ENSP00000358674 | UBL4A   | 478  | 0.113 |
| ENSP00000362413 | PGK1    | 472  | 0.113 |
| ENSP00000384515 | PARVB   | 339  | 0.117 |
| ENSP00000253363 | RBM39   | 480  | 0.119 |
| ENSP00000285379 | CA2     | 482  | 0.119 |
| ENSP00000303634 | LRP8    | 369  | 0.119 |
| ENSP00000313419 | CD19    | 701  | 0.119 |
| ENSP00000364133 | TGFBR1  | 1707 | 0.119 |
| ENSP00000262445 | MAP2K4  | 201  | 0.122 |
| ENSP00000351997 | MAP2K6  | 419  | 0.122 |
| ENSP00000379213 | PTHLH   | 8    | 0.122 |
| ENSP00000361423 | ABL1    | 836  | 0.123 |
| ENSP00000397552 | ACTL6A  | 486  | 0.124 |
| ENSP00000265038 | ERCC8   | 12   | 0.129 |
| ENSP00000225983 | HDAC5   | 8    | 0.13  |

|                 |         |      |       |
|-----------------|---------|------|-------|
| ENSP00000360217 | RHAG    | 130  | 0.13  |
| ENSP00000371973 | SAP18   | 480  | 0.13  |
| ENSP00000259075 | TANK    | 8    | 0.132 |
| ENSP00000286301 | CSF1R   | 476  | 0.135 |
| ENSP00000371067 | JAK2    | 1809 | 0.137 |
| ENSP00000259808 | RIPK1   | 817  | 0.138 |
| ENSP00000382004 | CTNND1  | 681  | 0.138 |
| ENSP00000314897 | ANGPT2  | 1    | 0.139 |
| ENSP00000274459 | ATG12   | 480  | 0.14  |
| ENSP00000290158 | KPNB1   | 482  | 0.142 |
| ENSP00000374372 | SPTB    | 352  | 0.142 |
| ENSP00000312999 | GNAI2   | 3    | 0.143 |
| ENSP00000225792 | DDX5    | 1    | 0.144 |
| ENSP00000243776 | CHPF    | 479  | 0.144 |
| ENSP00000329411 | IRF7    | 18   | 0.145 |
| ENSP00000315011 | EDNRA   | 1    | 0.146 |
| ENSP00000383977 | TEK     | 1    | 0.146 |
| ENSP00000327070 | MDH2    | 42   | 0.147 |
| ENSP00000245414 | IRF1    | 481  | 0.148 |
| ENSP00000346437 | ATG7    | 480  | 0.149 |
| ENSP00000225577 | RPS6KB1 | 482  | 0.151 |
| ENSP00000312697 | DMAPI1  | 481  | 0.152 |

|                 |         |      |       |
|-----------------|---------|------|-------|
| ENSP00000358716 | DDX20   | 408  | 0.152 |
| ENSP00000379339 | RPS29   | 24   | 0.152 |
| ENSP00000346389 | MEF2A   | 10   | 0.153 |
| ENSP00000356425 | UCHL5   | 482  | 0.153 |
| ENSP00000358525 | NGF     | 1291 | 0.153 |
| ENSP00000252945 | CYP2E1  | 481  | 0.154 |
| ENSP00000261799 | PDGFRB  | 676  | 0.155 |
| ENSP00000360683 | PTPN1   | 598  | 0.157 |
| ENSP00000283006 | CENPH   | 1    | 0.158 |
| ENSP00000358997 | IRAK1   | 1426 | 0.16  |
| ENSP00000350720 | SMARCA4 | 1223 | 0.161 |
| ENSP00000360916 | VAV2    | 424  | 0.162 |
| ENSP00000367309 | MAOB    | 6    | 0.162 |
| ENSP00000366607 | SF1     | 8    | 0.163 |
| ENSP00000220751 | RIPK2   | 3    | 0.167 |
| ENSP00000263621 | ELANE   | 3    | 0.167 |
| ENSP00000308533 | GEMIN2  | 408  | 0.169 |
| ENSP00000360869 | IFIT1   | 471  | 0.175 |
| ENSP00000301838 | FADD    | 375  | 0.176 |
| ENSP00000401980 | MAVS    | 483  | 0.178 |
| ENSP00000355632 | GALNT2  | 2    | 0.18  |
| ENSP00000358335 | MAP3K7  | 419  | 0.182 |

|                 |        |      |       |
|-----------------|--------|------|-------|
| ENSP00000274376 | RASA1  | 727  | 0.183 |
| ENSP00000302269 | VAV1   | 670  | 0.184 |
| ENSP00000267082 | ITGB7  | 243  | 0.186 |
| ENSP00000354859 | DRD2   | 132  | 0.186 |
| ENSP00000273951 | GC     | 1    | 0.19  |
| ENSP00000372023 | CHEK2  | 6    | 0.19  |
| ENSP00000219476 | TSC2   | 716  | 0.191 |
| ENSP00000268035 | IGF1R  | 1842 | 0.196 |
| ENSP00000307272 | RPTOR  | 2    | 0.196 |
| ENSP00000263464 | BIRC3  | 3    | 0.198 |
| ENSP00000337103 | CHAT   | 8    | 0.199 |
| ENSP00000360519 | RBP4   | 460  | 0.199 |
| ENSP00000254066 | RARA   | 1332 | 0.2   |
| ENSP00000342007 | CYP1A2 | 198  | 0.2   |
| ENSP00000229794 | MAPK14 | 956  | 0.201 |
| ENSP00000262435 | SMURF2 | 12   | 0.202 |
| ENSP00000252486 | APOE   | 369  | 0.203 |
| ENSP00000330393 | LEPR   | 7    | 0.208 |
| ENSP00000387286 | RAB1A  | 482  | 0.209 |
| ENSP00000222005 | CDC37  | 538  | 0.21  |
| ENSP00000413254 | RPH3A  | 1    | 0.211 |
| ENSP00000297185 | HSPA9  | 482  | 0.213 |

|                 |          |      |       |
|-----------------|----------|------|-------|
| ENSP00000358541 | SIKE1    | 105  | 0.214 |
| ENSP00000363512 | ALOX5    | 8    | 0.215 |
| ENSP00000358866 | FLNA     | 430  | 0.216 |
| ENSP00000233146 | MSH2     | 481  | 0.22  |
| ENSP00000223095 | SERPINE1 | 567  | 0.227 |
| ENSP00000360718 | RAB3B    | 1    | 0.232 |
| ENSP00000318585 | BACE1    | 480  | 0.233 |
| ENSP00000265023 | KNG1     | 480  | 0.235 |
| ENSP00000261707 | SLC6A4   | 34   | 0.242 |
| ENSP00000280097 | HNMT     | 154  | 0.242 |
| ENSP00000360266 | JUN      | 4118 | 0.243 |
| ENSP00000368699 | ISG15    | 708  | 0.243 |
| ENSP00000238081 | YWHAQ    | 1    | 0.247 |
| ENSP00000287936 | HMGCR    | 2644 | 0.247 |
| ENSP00000261023 | ITGAV    | 101  | 0.249 |
| ENSP00000363641 | TXN      | 18   | 0.25  |
| ENSP00000414303 | BDNF     | 54   | 0.251 |
| ENSP00000374354 | EXOSC8   | 575  | 0.252 |
| ENSP00000348551 | NCOR2    | 502  | 0.256 |
| ENSP00000380227 | ITGA4    | 411  | 0.256 |
| ENSP00000354522 | TOP1     | 242  | 0.26  |
| ENSP00000304895 | IRS1     | 1402 | 0.263 |



|                 |          |      |       |
|-----------------|----------|------|-------|
| ENSP00000356087 | IKBKE    | 94   | 0.263 |
| ENSP00000264033 | CBL      | 9217 | 0.266 |
| ENSP00000228682 | GLI1     | 4    | 0.267 |
| ENSP00000310127 | IRF3     | 264  | 0.268 |
| ENSP00000196551 | RPS5     | 1    | 0.27  |
| ENSP00000265724 | ABCB1    | 35   | 0.272 |
| ENSP00000368683 | EDN1     | 93   | 0.272 |
| ENSP00000260433 | CYP19A1  | 483  | 0.273 |
| ENSP00000338934 | EZR      | 1351 | 0.273 |
| ENSP00000332643 | NDN      | 53   | 0.276 |
| ENSP00000222256 | RAB3A    | 482  | 0.277 |
| ENSP00000335620 | GSTA1    | 87   | 0.278 |
| ENSP00000370938 | CDK8     | 357  | 0.278 |
| ENSP00000044462 | PSMA4    | 160  | 0.279 |
| ENSP00000162749 | TNFRSF1A | 516  | 0.279 |
| ENSP00000172229 | NGFR     | 541  | 0.279 |
| ENSP00000216911 | AURKA    | 481  | 0.279 |
| ENSP00000361892 | STK4     | 3    | 0.28  |
| ENSP00000233946 | IL1R1    | 478  | 0.284 |
| ENSP00000334122 | FGF3     | 478  | 0.284 |
| ENSP00000352257 | XRCC6    | 1    | 0.285 |
| ENSP00000354586 | GLI2     | 2    | 0.289 |

|                 |          |      |       |
|-----------------|----------|------|-------|
| ENSP00000419692 | RXRA     | 554  | 0.294 |
| ENSP00000252444 | LDLR     | 8    | 0.296 |
| ENSP00000321656 | CDC25C   | 49   | 0.296 |
| ENSP00000336630 | ADORA2A  | 3    | 0.298 |
| ENSP00000264110 | ATF2     | 387  | 0.3   |
| ENSP00000209875 | CBX5     | 482  | 0.305 |
| ENSP00000303019 | GPHN     | 2    | 0.308 |
| ENSP00000324729 | SAV1     | 3    | 0.312 |
| ENSP00000211998 | VCL      | 474  | 0.313 |
| ENSP00000300413 | SNRPD1   | 408  | 0.313 |
| ENSP00000358595 | CGA      | 478  | 0.313 |
| ENSP00000247668 | TRAF2    | 1422 | 0.314 |
| ENSP00000265351 | XPO5     | 74   | 0.314 |
| ENSP00000239223 | DUSP1    | 124  | 0.317 |
| ENSP00000262613 | SLC9A3R1 | 1340 | 0.318 |
| ENSP00000265709 | ANK1     | 352  | 0.318 |
| ENSP00000225964 | COL1A1   | 482  | 0.319 |
| ENSP00000278616 | ATM      | 1219 | 0.319 |
| ENSP00000256104 | FABP4    | 1    | 0.327 |
| ENSP00000326804 | CUL1     | 482  | 0.331 |
| ENSP00000349437 | IGF2R    | 142  | 0.331 |
| ENSP00000372793 | LTA      | 5    | 0.331 |

|                 |          |      |       |
|-----------------|----------|------|-------|
| ENSP00000229854 | MCM3     | 351  | 0.333 |
| ENSP00000354720 | SMC3     | 479  | 0.337 |
| ENSP00000358918 | SUFU     | 3    | 0.342 |
| ENSP00000318297 | RUVBL1   | 478  | 0.348 |
| ENSP00000350275 | HIST1H3A | 482  | 0.349 |
| ENSP00000251849 | RAF1     | 5554 | 0.355 |
| ENSP00000317159 | CYC1     | 30   | 0.356 |
| ENSP00000355261 | SMG5     | 9    | 0.367 |
| ENSP00000254940 | NIP7     | 482  | 0.368 |
| ENSP00000261205 | SYT1     | 481  | 0.368 |
| ENSP00000341551 | SMAD4    | 1007 | 0.368 |
| ENSP00000386896 | ITGA6    | 5    | 0.369 |
| ENSP00000228307 | PXN      | 419  | 0.371 |
| ENSP00000282561 | GJA1     | 480  | 0.373 |
| ENSP00000362361 | CDK9     | 593  | 0.374 |
| ENSP00000269260 | ARRB2    | 957  | 0.375 |
| ENSP00000311113 | JUP      | 289  | 0.38  |
| ENSP00000287727 | ZFYVE9   | 464  | 0.382 |
| ENSP00000348307 | SIRPA    | 264  | 0.383 |
| ENSP00000311677 | PPP1R8   | 481  | 0.384 |
| ENSP00000353483 | MAPK8    | 783  | 0.386 |
| ENSP00000347232 | BLM      | 1    | 0.387 |

|                 |          |     |       |
|-----------------|----------|-----|-------|
| ENSP00000268712 | NCOR1    | 397 | 0.388 |
| ENSP00000212015 | SIRT1    | 46  | 0.391 |
| ENSP00000271452 | NUF2     | 1   | 0.4   |
| ENSP00000351908 | MAP3K5   | 18  | 0.405 |
| ENSP00000384708 | FSHR     | 2   | 0.408 |
| ENSP00000276198 | HTR2C    | 5   | 0.414 |
| ENSP00000340820 | MAPT     | 482 | 0.418 |
| ENSP00000359074 | L1CAM    | 352 | 0.421 |
| ENSP00000254122 | FSHB     | 2   | 0.424 |
| ENSP00000223321 | PSMA2    | 321 | 0.427 |
| ENSP00000215071 | PSMD8    | 6   | 0.435 |
| ENSP00000301141 | CYP2A6   | 1   | 0.435 |
| ENSP00000396219 | MEF2C    | 5   | 0.443 |
| ENSP00000341344 | GGA1     | 480 | 0.449 |
| ENSP00000355325 | PSMB5    | 160 | 0.449 |
| ENSP00000361850 | PLAU     | 128 | 0.45  |
| ENSP00000356438 | PTGS2    | 687 | 0.453 |
| ENSP00000311344 | PPP2R1B  | 27  | 0.455 |
| ENSP00000249299 | NAA38    | 61  | 0.46  |
| ENSP00000352980 | HIST1H4A | 487 | 0.465 |
| ENSP00000354394 | STAT1    | 841 | 0.468 |
| ENSP00000333982 | NDEL1    | 1   | 0.472 |

|                 |          |      |       |
|-----------------|----------|------|-------|
| ENSP00000271628 | SF3B4    | 9    | 0.475 |
| ENSP00000296581 | LSM6     | 3    | 0.478 |
| ENSP00000340691 | EIF4EBP1 | 324  | 0.481 |
| ENSP00000296585 | ITGA2    | 529  | 0.487 |
| ENSP00000315644 | TYMS     | 489  | 0.489 |
| ENSP00000264606 | HDAC4    | 5    | 0.496 |
| ENSP00000342374 | SNRPD2   | 41   | 0.499 |
| ENSP00000351273 | CASP8    | 118  | 0.51  |
| ENSP00000297338 | RAD21    | 7    | 0.511 |
| ENSP00000256443 | CDK7     | 14   | 0.512 |
| ENSP00000352608 | RYR1     | 16   | 0.513 |
| ENSP00000299421 | ILK      | 347  | 0.514 |
| ENSP00000292303 | CCR5     | 316  | 0.516 |
| ENSP00000371138 | FKBP1A   | 20   | 0.52  |
| ENSP00000308938 | PLG      | 713  | 0.523 |
| ENSP00000272190 | REN      | 39   | 0.525 |
| ENSP00000372975 | HLA-C    | 5    | 0.529 |
| ENSP00000315859 | RNPS1    | 138  | 0.531 |
| ENSP00000349467 | CALM1    | 482  | 0.537 |
| ENSP00000306245 | FOS      | 1654 | 0.539 |
| ENSP00000354558 | MTOR     | 1071 | 0.541 |
| ENSP00000332468 | TRAF3    | 471  | 0.543 |

|                 |        |       |       |
|-----------------|--------|-------|-------|
| ENSP00000209728 | CDC6   | 385   | 0.549 |
| ENSP00000319635 | CXCR2  | 3     | 0.551 |
| ENSP00000267868 | RAD51  | 247   | 0.562 |
| ENSP00000359531 | GTF2B  | 137   | 0.564 |
| ENSP00000337825 | LCK    | 1307  | 0.567 |
| ENSP00000367797 | SKI    | 3     | 0.567 |
| ENSP00000379625 | MYD88  | 478   | 0.567 |
| ENSP00000269305 | TP53   | 15682 | 0.568 |
| ENSP00000278572 | RPS3   | 1     | 0.571 |
| ENSP00000358622 | IKBKG  | 3     | 0.575 |
| ENSP00000359345 | RPL5   | 973   | 0.577 |
| ENSP00000341189 | PTK2   | 1217  | 0.578 |
| ENSP00000384675 | SOS1   | 1378  | 0.579 |
| ENSP00000301280 | CHAF1A | 487   | 0.581 |
| ENSP00000305372 | ADRB2  | 808   | 0.581 |
| ENSP00000299543 | CTDP1  | 184   | 0.587 |
| ENSP00000386259 | NEB    | 12    | 0.592 |
| ENSP00000250495 | NEDD8  | 85    | 0.593 |
| ENSP00000363071 | DES    | 12    | 0.598 |
| ENSP00000343274 | INTS8  | 94    | 0.6   |
| ENSP00000396308 | DHFR   | 3     | 0.6   |
| ENSP00000261405 | VWF    | 49    | 0.601 |

|                 |         |       |       |
|-----------------|---------|-------|-------|
| ENSP00000370571 | TH      | 2     | 0.601 |
| ENSP00000353622 | SIN3A   | 339   | 0.604 |
| ENSP00000344818 | UBC     | 42741 | 0.609 |
| ENSP00000370473 | IGFBP3  | 678   | 0.609 |
| ENSP00000221138 | PPP2CB  | 12    | 0.611 |
| ENSP00000409132 | HLA-G   | 211   | 0.611 |
| ENSP00000262629 | TYROBP  | 742   | 0.616 |
| ENSP00000301019 | CDT1    | 15    | 0.618 |
| ENSP00000309103 | BAD     | 105   | 0.623 |
| ENSP00000314004 | ANAPC2  | 12    | 0.633 |
| ENSP00000295897 | ALB     | 211   | 0.64  |
| ENSP00000256442 | CCNB1   | 4879  | 0.646 |
| ENSP00000315702 | MOB4    | 148   | 0.646 |
| ENSP00000262160 | SMAD2   | 577   | 0.647 |
| ENSP00000278916 | CHEK1   | 37    | 0.647 |
| ENSP00000268058 | PML     | 493   | 0.648 |
| ENSP00000257181 | PRPF38A | 3     | 0.656 |
| ENSP00000291552 | U2AF1   | 112   | 0.656 |
| ENSP00000274335 | PIK3R1  | 1253  | 0.657 |
| ENSP00000302961 | HSPA4   | 16    | 0.665 |
| ENSP00000262477 | RABEP1  | 338   | 0.668 |
| ENSP00000366135 | EXOSC10 | 2032  | 0.669 |

|                 |         |      |       |
|-----------------|---------|------|-------|
| ENSP00000046794 | LCP2    | 131  | 0.672 |
| ENSP00000242577 | DYNLL1  | 310  | 0.672 |
| ENSP00000297494 | NOS3    | 622  | 0.673 |
| ENSP00000302967 | HDAC3   | 55   | 0.674 |
| ENSP00000264381 | BCHE    | 1437 | 0.677 |
| ENSP00000267101 | ERBB3   | 9    | 0.677 |
| ENSP00000215829 | SNRPD3  | 626  | 0.684 |
| ENSP00000324804 | PPP2R1A | 32   | 0.696 |
| ENSP00000284957 | RABGEF1 | 338  | 0.697 |
| ENSP00000230354 | TBP     | 612  | 0.701 |
| ENSP00000308450 | CDC20   | 655  | 0.705 |
| ENSP00000396127 | RAN     | 949  | 0.707 |
| ENSP00000364898 | SYK     | 763  | 0.71  |
| ENSP00000266000 | DAXX    | 2    | 0.712 |
| ENSP00000260970 | PPIG    | 3    | 0.713 |
| ENSP00000348577 | RANGAP1 | 929  | 0.72  |
| ENSP00000219548 | STUB1   | 405  | 0.724 |
| ENSP00000287647 | FANCD2  | 17   | 0.728 |
| ENSP00000297151 | SLU7    | 3    | 0.731 |
| ENSP00000240185 | TARDBP  | 1967 | 0.745 |
| ENSP00000418447 | PPP2CA  | 875  | 0.747 |
| ENSP00000353059 | APAF1   | 181  | 0.751 |



|                 |         |      |       |
|-----------------|---------|------|-------|
| ENSP00000215832 | MAPK1   | 758  | 0.754 |
| ENSP00000297518 | CDK5    | 1    | 0.757 |
| ENSP00000234111 | ODC1    | 4    | 0.759 |
| ENSP00000381331 | HDAC2   | 115  | 0.76  |
| ENSP00000261461 | PPP2R5A | 93   | 0.763 |
| ENSP00000263753 | SGOL1   | 768  | 0.768 |
| ENSP00000339109 | ANAPC1  | 371  | 0.768 |
| ENSP00000308541 | F2      | 396  | 0.772 |
| ENSP00000302564 | BCL2L1  | 26   | 0.774 |
| ENSP00000329380 | GP1BA   | 271  | 0.774 |
| ENSP00000302486 | MAP2K1  | 521  | 0.775 |
| ENSP00000262643 | CCNE1   | 307  | 0.778 |
| ENSP00000361418 | IPO13   | 2    | 0.788 |
| ENSP00000295797 | PRKCI   | 4    | 0.792 |
| ENSP00000278568 | PAK1    | 101  | 0.793 |
| ENSP00000216225 | RBX1    | 272  | 0.796 |
| ENSP00000363055 | ZWINT   | 4    | 0.796 |
| ENSP00000367959 | HTR2A   | 1    | 0.797 |
| ENSP00000288986 | NCK1    | 101  | 0.798 |
| ENSP00000362900 | SRSF4   | 1    | 0.798 |
| ENSP00000223023 | WASL    | 459  | 0.799 |
| ENSP00000262320 | AXIN1   | 1065 | 0.799 |

|                 |          |     |       |
|-----------------|----------|-----|-------|
| ENSP00000302955 | RRM2     | 24  | 0.8   |
| ENSP00000311032 | CASP3    | 236 | 0.802 |
| ENSP00000309503 | YWHAZ    | 336 | 0.807 |
| ENSP00000369757 | RPS6     | 10  | 0.809 |
| ENSP00000326031 | PPP1CA   | 1   | 0.813 |
| ENSP00000235090 | WDR77    | 736 | 0.823 |
| ENSP00000258962 | SRSF1    | 27  | 0.824 |
| ENSP00000284811 | TCEB1    | 10  | 0.826 |
| ENSP00000301633 | BIRC5    | 15  | 0.827 |
| ENSP00000348986 | INS-IGF2 | 601 | 0.829 |
| ENSP00000340330 | KAT5     | 484 | 0.835 |
| ENSP00000222812 | STX1A    | 459 | 0.837 |
| ENSP00000378165 | ZNF207   | 723 | 0.842 |
| ENSP00000329357 | SP1      | 159 | 0.843 |
| ENSP00000359727 | BAG2     | 3   | 0.845 |
| ENSP00000301764 | DDB1     | 12  | 0.846 |
| ENSP00000362592 | RBBP4    | 119 | 0.846 |
| ENSP00000366013 | GNB2L1   | 10  | 0.847 |
| ENSP00000374455 | SQSTM1   | 4   | 0.849 |
| ENSP00000312735 | POLR2B   | 550 | 0.85  |
| ENSP00000354554 | MT-CYB   | 30  | 0.851 |
| ENSP00000310596 | LSM1     | 32  | 0.852 |

|                 |        |      |       |
|-----------------|--------|------|-------|
| ENSP00000378529 | FZR1   | 26   | 0.852 |
| ENSP00000300574 | CRK    | 128  | 0.857 |
| ENSP00000262238 | YY1    | 1    | 0.86  |
| ENSP00000357858 | BUB3   | 723  | 0.866 |
| ENSP00000299402 | APBB1  | 1    | 0.867 |
| ENSP00000361626 | YBX1   | 18   | 0.87  |
| ENSP00000312995 | CLSPN  | 7    | 0.874 |
| ENSP00000011653 | CD4    | 321  | 0.879 |
| ENSP00000284981 | APP    | 3    | 0.88  |
| ENSP00000368104 | BMP2   | 46   | 0.887 |
| ENSP00000348554 | CDC16  | 14   | 0.888 |
| ENSP00000231487 | SKP1   | 213  | 0.89  |
| ENSP00000227758 | BIRC2  | 22   | 0.895 |
| ENSP00000262803 | UPF1   | 28   | 0.898 |
| ENSP00000346022 | RPL9   | 1    | 0.903 |
| ENSP00000324806 | GSK3B  | 329  | 0.915 |
| ENSP00000260363 | KIF23  | 1    | 0.917 |
| ENSP00000269141 | CDH2   | 2201 | 0.918 |
| ENSP00000376076 | SUMO1  | 70   | 0.922 |
| ENSP00000324897 | UBE2I  | 859  | 0.93  |
| ENSP00000352400 | NUP214 | 8    | 0.93  |
| ENSP00000314214 | VAMP2  | 22   | 0.935 |

|                 |        |      |       |
|-----------------|--------|------|-------|
| ENSP00000362820 | SRSF3  | 2    | 0.939 |
| ENSP00000262187 | RHEB   | 1    | 0.94  |
| ENSP00000354961 | MT-ND4 | 16   | 0.94  |
| ENSP00000294172 | NXF1   | 8    | 0.941 |
| ENSP00000263309 | CLNS1A | 274  | 0.947 |
| ENSP00000292644 | PSMC2  | 2012 | 0.947 |
| ENSP00000319169 | PRMT5  | 275  | 0.949 |
| ENSP00000414634 | LSM2   | 64   | 0.954 |
| ENSP00000219255 | PARD6A | 4    | 0.955 |
| ENSP00000354876 | MT-CO2 | 14   | 0.955 |
| ENSP00000313950 | AURKB  | 11   | 0.957 |
| ENSP00000354499 | MT-CO1 | 14   | 0.957 |
| ENSP00000280665 | DCP1B  | 1    | 0.959 |
| ENSP00000352516 | DNMT1  | 440  | 0.961 |
| ENSP00000350877 | SRSF2  | 2    | 0.962 |
| ENSP00000221494 | SF3A2  | 919  | 0.964 |
| ENSP00000269349 | EIF4A3 | 22   | 0.967 |
| ENSP00000264951 | XRN1   | 12   | 0.969 |
| ENSP00000252102 | NDUFA2 | 16   | 0.97  |
| ENSP00000274026 | CCNA2  | 1444 | 0.97  |
| ENSP00000248566 | SHFM1  | 675  | 0.971 |
| ENSP00000307863 | U2AF2  | 978  | 0.971 |

|                 |         |       |       |
|-----------------|---------|-------|-------|
| ENSP00000314458 | CDC42   | 1120  | 0.972 |
| ENSP00000003084 | CFTR    | 11652 | 0.973 |
| ENSP00000281708 | FBXW7   | 24    | 0.975 |
| ENSP00000162330 | BCAR1   | 169   | 0.977 |
| ENSP00000353224 | TFRC    | 89    | 0.977 |
| ENSP00000417404 | HFE     | 89    | 0.977 |
| ENSP00000340858 | B2M     | 211   | 0.979 |
| ENSP00000363676 | RPL11   | 451   | 0.979 |
| ENSP00000316879 | EIF4G1  | 22    | 0.981 |
| ENSP00000348708 | UPF2    | 59    | 0.981 |
| ENSP00000276201 | UPF3B   | 36    | 0.982 |
| ENSP00000365891 | WAS     | 86    | 0.984 |
| ENSP00000326366 | PSEN1   | 30    | 0.987 |
| ENSP00000367207 | MYC     | 16    | 0.988 |
| ENSP00000357656 | FYN     | 324   | 0.989 |
| ENSP00000314491 | SRRT    | 77    | 0.99  |
| ENSP00000268182 | IQGAP1  | 17    | 0.991 |
| ENSP00000287598 | BUB1B   | 395   | 0.992 |
| ENSP00000365439 | HNRNPK  | 970   | 0.993 |
| ENSP00000398597 | EXOSC6  | 6     | 0.993 |
| ENSP00000227378 | HSPA8   | 80    | 0.996 |
| ENSP00000313829 | KHDRBS1 | 953   | 0.996 |

|                 |                       |      |       |
|-----------------|-----------------------|------|-------|
| ENSP00000348461 | RAC1                  | 14   | 0.998 |
| CID000004740    | pentoxifylline        | 6    | 0     |
| CID000017734    | HC Blue 1             | 1    | 0     |
| CID000024841    | iodide                | 2642 | 0     |
| CID000107921    | S-mephenytoin         | 482  | 0     |
| CID000161491    | MMA(III)              | 482  | 0     |
| CID000440994    | lacto-N-biose         | 482  | 0     |
| CID000441248    | Gal beta 1-3GalNAc    | 482  | 0     |
| CID000007628    | borate                | 482  | 0.001 |
| CID000008299    | acetol                | 480  | 0.001 |
| CID000065064    | EGCG                  | 482  | 0.001 |
| CID002733525    | tamoxifen             | 4379 | 0.001 |
| CID000000890    | phytate               | 482  | 0.002 |
| CID000004594    | omeprazole            | 482  | 0.002 |
| CID000097535    | NSC638615             | 1    | 0.002 |
| CID000000880    | methylglyoxal         | 479  | 0.004 |
| CID000008582    | inosine monophosphate | 482  | 0.004 |
| CID000024139    | chitin                | 2839 | 0.004 |
| CID000000180    | acetone               | 1    | 0.006 |
| CID000000525    | malate                | 479  | 0.006 |
| CID006433205    | methylazoxymethanol   | 480  | 0.006 |
| CID000006106    | L-leucine             | 955  | 0.007 |

|              |                        |      |       |
|--------------|------------------------|------|-------|
| CID000003559 | haloperidol            | 482  | 0.008 |
| CID000006359 | BDCM                   | 481  | 0.008 |
| CID000010461 | sulfur mustard         | 482  | 0.008 |
| CID000124886 | Glutathione            | 1433 | 0.01  |
| CID006326970 | selenium               | 482  | 0.01  |
| CID000007845 | 1,3-butadiene          | 1    | 0.011 |
| CID000000949 | N,N-dimethylaniline    | 478  | 0.013 |
| CID000006503 | tris                   | 1440 | 0.013 |
| CID000051683 | swainsonine            | 481  | 0.013 |
| CID000392622 | ritonavir              | 480  | 0.02  |
| CID000000978 | p-aminobenzoic a       | 481  | 0.022 |
| CID000060749 | gemcitabine            | 348  | 0.022 |
| CID000092824 | D-malate               | 1    | 0.022 |
| CID000002733 | chlorzoxazone          | 2    | 0.024 |
| CID000000312 | Chloride ion           | 4870 | 0.026 |
| CID000440552 | beta-GalNAc            | 478  | 0.026 |
| CID000002771 | citalopram             | 26   | 0.028 |
| CID000006115 | aniline                | 1    | 0.03  |
| CID000001032 | propionate             | 478  | 0.031 |
| CID000006167 | colchicine             | 482  | 0.031 |
| CID000043815 | paroxetine             | 5    | 0.033 |
| CID000008947 | monomethylarsonic acid | 2    | 0.034 |

|              |                                          |      |       |
|--------------|------------------------------------------|------|-------|
| CID000010214 | 3'-phosphoadenosine<br>5'-phosphosulfate | 482  | 0.036 |
| CID000439162 | alpha-glycerophosphate                   | 763  | 0.036 |
| CID000003032 | diclofenac                               | 489  | 0.037 |
| CID000000768 | hydrogen cyanide                         | 481  | 0.038 |
| CID000172197 | angiotensin II                           | 448  | 0.039 |
| CID000000170 | dihydropteroate                          | 1    | 0.045 |
| CID000002514 | cadmium                                  | 482  | 0.05  |
| CID000000781 | thiocyanate                              | 478  | 0.053 |
| CID000007405 | pyroglutamate                            | 480  | 0.053 |
| CID000000936 | vitamin B                                | 39   | 0.054 |
| CID000002513 | dimethylarsinic a                        | 1    | 0.058 |
| CID000002541 | candesartan                              | 7    | 0.059 |
| CID000003776 | isopropanol                              | 3    | 0.059 |
| CID023724461 | UDP-N-acetyl-alpha-D-galactosamine       | 482  | 0.06  |
| CID000065999 | telmisartan                              | 916  | 0.066 |
| CID000439427 | Glc-6-P                                  | 1    | 0.069 |
| CID000004174 | metyrapone                               | 11   | 0.07  |
| CID000005754 | cortisol                                 | 1598 | 0.07  |
| CID000033032 | glutamic a                               | 1932 | 0.07  |
| CID000060699 | topotecan                                | 242  | 0.07  |
| CID000003961 | losartan                                 | 39   | 0.071 |
| CID000444972 | fumarate                                 | 262  | 0.072 |



|              |                             |      |       |
|--------------|-----------------------------|------|-------|
| CID000061503 | D-lactate                   | 46   | 0.073 |
| CID000002244 | aspirin                     | 68   | 0.077 |
| CID000643975 | flavin adenine dinucleotide | 1108 | 0.077 |
| CID000005743 | dexamethasone               | 724  | 0.085 |
| CID000001775 | phenytoin                   | 8    | 0.088 |
| CID011020241 | ascorbate                   | 2    | 0.094 |
| CID000005472 | ticlopidine                 | 31   | 0.104 |
| CID000000970 | oxaloacetate                | 480  | 0.105 |
| CID000004829 | pioglitazone                | 104  | 0.105 |
| CID000055245 | mifepristone                | 479  | 0.107 |
| CID000071077 | D-serine                    | 6    | 0.116 |
| CID000000177 | acetaldehyde                | 947  | 0.124 |
| CID000000784 | H2O2                        | 1436 | 0.124 |
| CID000000760 | glyoxylate                  | 234  | 0.137 |
| CID000005997 | cholesterol                 | 2654 | 0.14  |
| CID000008629 | UDP-glucose                 | 2    | 0.146 |
| CID000003016 | diazepam                    | 24   | 0.154 |
| CID000445354 | retinol                     | 461  | 0.154 |
| CID005280453 | 1,25(OH)2D3                 | 482  | 0.155 |
| CID000643976 | flavin mononucleotide       | 248  | 0.157 |
| CID000013945 | dCMP                        | 4    | 0.167 |
| CID000002336 | benzo(a)pyrene              | 1    | 0.176 |

|              |                            |      |       |
|--------------|----------------------------|------|-------|
| CID000000647 | DMAPP                      | 154  | 0.19  |
| CID000000887 | methanol                   | 34   | 0.19  |
| CID000005819 | thyroxine                  | 56   | 0.193 |
| CID000001003 | phosphate                  | 2042 | 0.201 |
| CID000006140 | phenylalanine              | 38   | 0.202 |
| CID000005815 | epinephrine                | 1    | 0.221 |
| CID000001935 | tacrine                    | 172  | 0.223 |
| CID005283731 | 25-hydroxyvitamin D        | 1    | 0.228 |
| CID000071080 | D-alanine                  | 6    | 0.231 |
| CID000031100 | bromocriptine              | 2    | 0.243 |
| CID000002519 | caffeine                   | 21   | 0.244 |
| CID000145742 | L-proline                  | 4    | 0.246 |
| CID000638015 | 11-cis-retinal             | 21   | 0.247 |
| CID000005961 | glutamine                  | 461  | 0.264 |
| CID000000712 | formalin                   | 4    | 0.272 |
| CID000002520 | verapamil                  | 33   | 0.287 |
| CID000002332 | benzamidine                | 1    | 0.297 |
| CID000006137 | L-methionine               | 3    | 0.315 |
| CID000000668 | dihydroxyacetone phosphate | 4    | 0.321 |
| CID000006131 | poly C                     | 482  | 0.324 |
| CID000006022 | adenosine diphosphate      | 2121 | 0.329 |
| CID000098792 | dihydrofolate              | 1    | 0.339 |

|              |                     |      |       |
|--------------|---------------------|------|-------|
| CID000004946 | propranolol         | 393  | 0.355 |
| CID000005994 | progesterone        | 3    | 0.356 |
| CID000446220 | cocaine             | 11   | 0.361 |
| CID000005757 | estradiol           | 496  | 0.368 |
| CID000439260 | norepinephrine      | 508  | 0.372 |
| CID000065063 | dUMP                | 12   | 0.381 |
| CID000001567 | 2-mercaptoethanol   | 4    | 0.398 |
| CID000006031 | uridine diphosphate | 954  | 0.399 |
| CID000016230 | amiloride           | 38   | 0.4   |
| CID000006128 | androstenedione     | 1    | 0.423 |
| CID000000991 | parathion           | 1444 | 0.43  |
| CID000002818 | clozapine           | 34   | 0.433 |
| CID000060961 | adenosine           | 484  | 0.44  |
| CID000005950 | L-alanine           | 20   | 0.443 |
| CID000005881 | DHEA                | 1    | 0.451 |
| CID000000813 | potassium           | 482  | 0.503 |
| CID000006322 | arginine            | 638  | 0.527 |
| CID000000888 | magnesium           | 4251 | 0.551 |
| CID005280360 | PGE2                | 115  | 0.552 |
| CID000000679 | DMSO                | 47   | 0.554 |
| CID000000280 | CO(2                | 282  | 0.564 |
| CID000000767 | bicarbonate         | 197  | 0.574 |

|              |                         |      |       |
|--------------|-------------------------|------|-------|
| CID000006076 | cyclic AMP              | 482  | 0.578 |
| CID000006030 | uridylate               | 414  | 0.592 |
| CID000000774 | histamine               | 701  | 0.595 |
| CID000000681 | dopamine                | 383  | 0.609 |
| CID000006013 | testosterone            | 656  | 0.616 |
| CID000001102 | spermidine              | 3    | 0.62  |
| CID000089594 | nicotine                | 3    | 0.624 |
| CID000000977 | oxygen                  | 3591 | 0.633 |
| CID000000222 | ammonia                 | 130  | 0.652 |
| CID000006804 | 5'-GMP                  | 62   | 0.659 |
| CID000444899 | arachidonic a           | 353  | 0.666 |
| CID000000750 | glycine                 | 522  | 0.671 |
| CID000001195 | isopentenyl diphosphate | 154  | 0.686 |
| CID000003779 | isoproterenol           | 4    | 0.705 |
| CID000445675 | UDP-GlcNAc              | 9    | 0.706 |
| CID000000051 | alpha-ketoglutarate     | 523  | 0.712 |
| CID000000187 | acetylcholine           | 259  | 0.746 |
| CID000004585 | olanzapine              | 10   | 0.746 |
| CID000006029 | uridine                 | 8    | 0.763 |
| CID000005202 | serotonin               | 39   | 0.775 |
| CID000066370 | alpha-D-glucose         | 3    | 0.792 |
| CID000001051 | pyridoxal 5'-phosphate  | 475  | 0.798 |

|              |                         |       |       |
|--------------|-------------------------|-------|-------|
| CID000000305 | choline                 | 1385  | 0.807 |
| CID000006083 | adenosine monophosphate | 490   | 0.821 |
| CID000000923 | sodium                  | 2464  | 0.826 |
| CID000005962 | lysine                  | 11    | 0.839 |
| CID000000985 | palmitate               | 1     | 0.929 |
| CID000000283 | formate                 | 280   | 0.934 |
| CID000000961 | hydroxyl radicals       | 613   | 0.949 |
| CID000439155 | AdoHcy                  | 445   | 0.954 |
| CID000000783 | hydride                 | 4     | 0.955 |
| CID000005885 | NADP                    | 529   | 0.96  |
| CID000005957 | adenosine triphosphate  | 27023 | 0.966 |
| CID000023925 | Fe(III)                 | 767   | 0.966 |
| CID000000190 | adenine                 | 7     | 0.978 |
| CID000000753 | glycerol                | 2505  | 0.979 |
| CID000023930 | manganese               | 15    | 0.983 |
| CID000005892 | beta-NAD                | 87    | 0.996 |
| CID000087642 | coenzyme A              | 8     | 0.996 |
| CID000023994 | zinc                    | 3280  | 0.997 |
| CID000000271 | calcium                 | 12484 | 0.998 |
| CID000006830 | guanosine triphosphate  | 4192  | 1     |
| CID000008977 | guanosine diphosphate   | 497   | 1     |
