# Supplementary material for: Identification of Novel Thyroid Cancer-Related Genes and Chemicals Using Shortest Path Algorithm
Source: Hindawi journal article supplement (doi:10.1155/2015/964795), 2015-01-01
Supplement: f1 [file 964795.f1.zip]

**Online Supporting Information S3.** 169 significant candidate genes and 49 significant candidate chemicals with permutation FDRs smaller than 0.05.

| <b>Gene or chemical ID</b> | <b>Gene or chemical name</b> | <b>Betweenness</b> | <b>Permutation FDR</b> |
|----------------------------|------------------------------|--------------------|------------------------|
| ENSP00000206249            | ESR1                         | 21841              | 0                      |
| ENSP00000226574            | NFKB1                        | 963                | 0                      |
| ENSP00000227507            | CCND1                        | 6321               | 0                      |
| ENSP00000259526            | NOV                          | 482                | 0                      |
| ENSP00000263851            | IL7                          | 482                | 0                      |
| ENSP00000268655            | ZNF174                       | 1                  | 0                      |
| ENSP00000269138            | SS18                         | 963                | 0                      |
| ENSP00000295108            | NEUROD1                      | 482                | 0                      |
| ENSP00000301012            | MVD                          | 482                | 0                      |
| ENSP00000302640            | UBTF                         | 482                | 0                      |
| ENSP00000302648            | NRTN                         | 482                | 0                      |
| ENSP00000304811            | UGT2B7                       | 963                | 0                      |
| ENSP00000306157            | IL7R                         | 482                | 0                      |
| ENSP00000327213            | NRIP1                        | 963                | 0                      |
| ENSP00000334181            | KDM4D                        | 482                | 0                      |
| ENSP00000337915            | CYP3A4                       | 4122               | 0                      |
| ENSP00000349508            | CHD4                         | 482                | 0                      |
| ENSP00000360973            | AGTR2                        | 482                | 0                      |
| ENSP00000368066            | HAO1                         | 482                | 0                      |

|                 |         |      |       |
|-----------------|---------|------|-------|
| ENSP00000368981 | SLC35B3 | 482  | 0     |
| ENSP00000377941 | ACTN1   | 962  | 0     |
| ENSP00000262809 | ELL     | 482  | 0.001 |
| ENSP00000270349 | SLC6A3  | 956  | 0.001 |
| ENSP00000295408 | MERTK   | 962  | 0.001 |
| ENSP00000338207 | LMO1    | 482  | 0.001 |
| ENSP00000346015 | RPL27A  | 477  | 0.001 |
| ENSP00000348089 | ERCC6   | 482  | 0.001 |
| ENSP00000357255 | BGLAP   | 482  | 0.001 |
| ENSP00000368754 | BAZ2A   | 482  | 0.001 |
| ENSP00000369396 | SLC4A11 | 482  | 0.001 |
| ENSP00000416387 | FBLIM1  | 43   | 0.001 |
| ENSP00000011684 | PLEKHG6 | 482  | 0.002 |
| ENSP00000262367 | CREBBP  | 5560 | 0.002 |
| ENSP00000276297 | DLC1    | 482  | 0.002 |
| ENSP00000327246 | VIPR1   | 476  | 0.002 |
| ENSP00000331358 | GAST    | 997  | 0.002 |
| ENSP00000335544 | CCKBR   | 696  | 0.002 |
| ENSP00000351605 | FZD6    | 482  | 0.002 |
| ENSP00000362690 | NR5A1   | 482  | 0.002 |
| ENSP00000371532 | VLDLR   | 494  | 0.002 |
| ENSP00000380514 | HAGH    | 3    | 0.002 |

|                 |           |      |       |
|-----------------|-----------|------|-------|
| ENSP00000391998 | ARTN      | 482  | 0.002 |
| ENSP00000397297 | NTF3      | 484  | 0.002 |
| ENSP00000274565 | SPINK7    | 482  | 0.003 |
| ENSP00000290330 | SNF8      | 482  | 0.003 |
| ENSP00000370748 | IDI1      | 482  | 0.003 |
| ENSP00000417763 | NAA10     | 482  | 0.003 |
| ENSP00000253339 | LATS1     | 482  | 0.004 |
| ENSP00000331288 | TMEM173   | 482  | 0.004 |
| ENSP00000269485 | TNFRSF11A | 962  | 0.005 |
| ENSP00000284818 | LY96      | 962  | 0.005 |
| ENSP00000323328 | SIGLEC7   | 478  | 0.005 |
| ENSP00000339151 | IKBKB     | 501  | 0.005 |
| ENSP00000344741 | INSIG1    | 482  | 0.005 |
| ENSP00000244007 | PLCG1     | 2851 | 0.006 |
| ENSP00000263208 | HIRA      | 482  | 0.006 |
| ENSP00000304169 | PITX2     | 482  | 0.006 |
| ENSP00000380033 | DDX17     | 482  | 0.006 |
| ENSP00000410294 | FGFR2     | 964  | 0.006 |
| ENSP00000227163 | SPI1      | 482  | 0.007 |
| ENSP00000279247 | CAPN1     | 470  | 0.007 |
| ENSP00000322142 | ING5      | 482  | 0.007 |
| ENSP00000401303 | SHC1      | 2222 | 0.007 |

|                 |         |      |       |
|-----------------|---------|------|-------|
| ENSP00000241052 | CAT     | 483  | 0.008 |
| ENSP00000245157 | BBS2    | 954  | 0.008 |
| ENSP00000346566 | CKAP5   | 482  | 0.008 |
| ENSP00000249373 | SMO     | 482  | 0.009 |
| ENSP00000250003 | MYOD1   | 2392 | 0.009 |
| ENSP00000279387 | PPP4C   | 482  | 0.009 |
| ENSP00000296028 | PPBP    | 3    | 0.009 |
| ENSP00000320378 | SLC7A8  | 474  | 0.009 |
| ENSP00000342278 | OAS2    | 481  | 0.009 |
| ENSP00000367802 | TAF1C   | 482  | 0.009 |
| ENSP00000415183 | MUC2    | 482  | 0.009 |
| ENSP00000228837 | FGF6    | 1434 | 0.01  |
| ENSP00000230050 | RPS12   | 481  | 0.01  |
| ENSP00000236147 | SELL    | 482  | 0.01  |
| ENSP00000306866 | GABARAP | 482  | 0.01  |
| ENSP00000276414 | GNRH1   | 962  | 0.011 |
| ENSP00000304669 | CTNNA1  | 969  | 0.011 |
| ENSP00000346879 | NKX2-1  | 482  | 0.011 |
| ENSP00000361965 | ADA     | 482  | 0.011 |
| ENSP00000364737 | CENPP   | 481  | 0.011 |
| ENSP00000387662 | GCG     | 1444 | 0.011 |
| ENSP00000304408 | COL3A1  | 482  | 0.012 |

|                 |         |      |       |
|-----------------|---------|------|-------|
| ENSP00000304915 | IL13    | 482  | 0.012 |
| ENSP00000294304 | LRP5    | 482  | 0.013 |
| ENSP00000312017 | FAM57A  | 1    | 0.013 |
| ENSP00000242067 | BBS9    | 482  | 0.014 |
| ENSP00000338345 | SNCA    | 1217 | 0.014 |
| ENSP00000244926 | SCGB1D2 | 481  | 0.015 |
| ENSP00000265773 | SMARCA2 | 962  | 0.015 |
| ENSP00000268057 | BBS4    | 474  | 0.016 |
| ENSP00000315130 | CLU     | 481  | 0.016 |
| ENSP00000356024 | CR2     | 667  | 0.016 |
| ENSP00000360025 | GADD45A | 482  | 0.017 |
| ENSP00000355759 | PARP1   | 1441 | 0.018 |
| ENSP00000222382 | CYP3A43 | 89   | 0.019 |
| ENSP00000256857 | GRP     | 975  | 0.019 |
| ENSP00000346032 | ANXA2   | 482  | 0.019 |
| ENSP00000374280 | RTF1    | 482  | 0.019 |
| ENSP00000216267 | BRD1    | 1    | 0.02  |
| ENSP00000221265 | PAF1    | 850  | 0.02  |
| ENSP00000260682 | CYP2C9  | 502  | 0.02  |
| ENSP00000367316 | ITGA8   | 1144 | 0.02  |
| ENSP00000168712 | FGF4    | 6    | 0.021 |
| ENSP00000268171 | FURIN   | 482  | 0.021 |

|                 |          |      |       |
|-----------------|----------|------|-------|
| ENSP00000338799 | IL6ST    | 1126 | 0.022 |
| ENSP00000363548 | CXCL12   | 482  | 0.022 |
| ENSP00000225698 | C1QBP    | 482  | 0.023 |
| ENSP00000305422 | CEBPB    | 220  | 0.023 |
| ENSP00000308208 | MMP14    | 4    | 0.023 |
| ENSP00000365435 | TNFRSF1B | 482  | 0.023 |
| ENSP00000367299 | VPS36    | 482  | 0.023 |
| ENSP00000296785 | ANKRA2   | 13   | 0.024 |
| ENSP00000363089 | TLR4     | 962  | 0.024 |
| ENSP00000309968 | ADAM17   | 480  | 0.025 |
| ENSP00000342143 | PDZK1    | 481  | 0.025 |
| ENSP00000349887 | ASNA1    | 478  | 0.025 |
| ENSP00000231509 | NR3C1    | 2843 | 0.026 |
| ENSP00000296674 | RPS23    | 457  | 0.026 |
| ENSP00000355518 | FH       | 304  | 0.027 |
| ENSP00000227752 | IL10RA   | 482  | 0.029 |
| ENSP00000407375 | GPX1     | 482  | 0.03  |
| ENSP00000259512 | DERL1    | 482  | 0.031 |
| ENSP00000300161 | YWHAB    | 958  | 0.031 |
| ENSP00000356070 | MAPKAPK2 | 961  | 0.031 |
| ENSP00000003100 | CYP51A1  | 1    | 0.032 |
| ENSP00000262965 | TCF3     | 964  | 0.032 |

|                 |         |      |       |
|-----------------|---------|------|-------|
| ENSP00000300134 | STAT6   | 1291 | 0.032 |
| ENSP00000155840 | KCNQ1   | 482  | 0.033 |
| ENSP00000263734 | EPAS1   | 39   | 0.033 |
| ENSP00000342952 | ADCY2   | 1059 | 0.033 |
| ENSP00000363998 | ITCH    | 955  | 0.033 |
| ENSP00000256078 | KRAS    | 341  | 0.034 |
| ENSP00000287820 | PPARG   | 2238 | 0.034 |
| ENSP00000296509 | MAD2L1  | 482  | 0.034 |
| ENSP00000419879 | CDS2    | 1    | 0.035 |
| ENSP00000338964 | GGT7    | 1    | 0.036 |
| ENSP00000373614 | SELPLG  | 482  | 0.036 |
| ENSP00000365682 | TLE1    | 482  | 0.037 |
| ENSP00000229595 | ASF1A   | 482  | 0.038 |
| ENSP00000240618 | KLRK1   | 482  | 0.039 |
| ENSP00000261167 | WBP11   | 1    | 0.039 |
| ENSP00000294728 | VCAM1   | 14   | 0.039 |
| ENSP00000308845 | MRPS12  | 1    | 0.039 |
| ENSP00000332353 | PTCH1   | 1438 | 0.039 |
| ENSP00000220809 | PLAT    | 482  | 0.04  |
| ENSP00000245907 | C3      | 962  | 0.04  |
| ENSP00000331736 | SELE    | 1    | 0.04  |
| ENSP00000283131 | SMARCA5 | 482  | 0.041 |

|                 |                |      |       |
|-----------------|----------------|------|-------|
| ENSP00000312652 | LEP            | 1360 | 0.041 |
| ENSP00000324648 | CYP2B6         | 509  | 0.043 |
| ENSP00000359998 | GSTA4          | 10   | 0.043 |
| ENSP00000316054 | DVL3           | 482  | 0.044 |
| ENSP00000329967 | TBK1           | 951  | 0.044 |
| ENSP00000352272 | MYOZ1          | 481  | 0.044 |
| ENSP00000262077 | NUP153         | 482  | 0.045 |
| ENSP00000263645 | CD81           | 36   | 0.045 |
| ENSP00000297268 | COL1A2         | 482  | 0.045 |
| ENSP00000268296 | ITGAX          | 6    | 0.046 |
| ENSP00000351407 | ARNT           | 1300 | 0.046 |
| ENSP00000010338 | TRAF3IP3       | 482  | 0.047 |
| ENSP00000248244 | TICAM1         | 480  | 0.047 |
| ENSP00000331487 | NPLOC4         | 473  | 0.047 |
| ENSP00000320180 | GHRHR          | 472  | 0.048 |
| ENSP00000338018 | HIF1A          | 6169 | 0.048 |
| ENSP00000340944 | PTPN11         | 1219 | 0.048 |
| ENSP00000366565 | VPS28          | 482  | 0.049 |
| CID000004740    | pentoxifylline | 6    | 0     |
| CID000017734    | HC Blue 1      | 1    | 0     |
| CID000024841    | iodide         | 2642 | 0     |
| CID000107921    | S-mephenytoin  | 482  | 0     |



|              |                       |      |       |
|--------------|-----------------------|------|-------|
| CID000161491 | MMA(III               | 482  | 0     |
| CID000440994 | lacto-N-biose         | 482  | 0     |
| CID000441248 | Gal beta 1-3GalNAc    | 482  | 0     |
| CID000007628 | borate                | 482  | 0.001 |
| CID000008299 | acetol                | 480  | 0.001 |
| CID000065064 | EGCG                  | 482  | 0.001 |
| CID002733525 | tamoxifen             | 4379 | 0.001 |
| CID000000890 | phytate               | 482  | 0.002 |
| CID000004594 | omeprazole            | 482  | 0.002 |
| CID000097535 | NSC638615             | 1    | 0.002 |
| CID000000880 | methylglyoxal         | 479  | 0.004 |
| CID000008582 | inosine monophosphate | 482  | 0.004 |
| CID000024139 | chitin                | 2839 | 0.004 |
| CID000000180 | acetone               | 1    | 0.006 |
| CID000000525 | malate                | 479  | 0.006 |
| CID006433205 | methylazoxymethanol   | 480  | 0.006 |
| CID000006106 | L-leucine             | 955  | 0.007 |
| CID000003559 | haloperidol           | 482  | 0.008 |
| CID000006359 | BDCM                  | 481  | 0.008 |
| CID000010461 | sulfur mustard        | 482  | 0.008 |
| CID000124886 | Glutathione           | 1433 | 0.01  |
| CID006326970 | selenium              | 482  | 0.01  |

|              |                                          |      |       |
|--------------|------------------------------------------|------|-------|
| CID000007845 | 1,3-butadiene                            | 1    | 0.011 |
| CID000000949 | N,N-dimethylaniline                      | 478  | 0.013 |
| CID000006503 | tris                                     | 1440 | 0.013 |
| CID000051683 | swainsonine                              | 481  | 0.013 |
| CID000392622 | ritonavir                                | 480  | 0.02  |
| CID000000978 | p-aminobenzoic a                         | 481  | 0.022 |
| CID000060749 | gemcitabine                              | 348  | 0.022 |
| CID000092824 | D-malate                                 | 1    | 0.022 |
| CID000002733 | chlorzoxazone                            | 2    | 0.024 |
| CID000000312 | Chloride ion                             | 4870 | 0.026 |
| CID000440552 | beta-GalNAc                              | 478  | 0.026 |
| CID000002771 | citalopram                               | 26   | 0.028 |
| CID000006115 | aniline                                  | 1    | 0.03  |
| CID000001032 | propionate                               | 478  | 0.031 |
| CID000006167 | colchicine                               | 482  | 0.031 |
| CID000043815 | paroxetine                               | 5    | 0.033 |
| CID000008947 | monomethylarsonic acid                   | 2    | 0.034 |
| CID000010214 | 3'-phosphoadenosine<br>5'-phosphosulfate | 482  | 0.036 |
| CID000439162 | alpha-glycerophosphate                   | 763  | 0.036 |
| CID000003032 | diclofenac                               | 489  | 0.037 |
| CID000000768 | hydrogen cyanide                         | 481  | 0.038 |
| CID000172197 | angiotensin II                           | 448  | 0.039 |

|              |                 |   |       |
|--------------|-----------------|---|-------|
| CID000000170 | dihydropteroate | 1 | 0.045 |
|--------------|-----------------|---|-------|
