# Supplementary material for: Identification of Novel Thyroid Cancer-Related Genes and Chemicals Using Shortest Path Algorithm
Source: Hindawi journal article supplement (doi:10.1155/2015/964795), 2015-01-01
Supplement: f1 [file 964795.f1.zip]

**Online Supporting Information S1.** 444 thyroid cancer-related genes retrieved from Uniprot, TSGene database, NCI and 44 thyroid cancer-related chemicals obtained from CTD.

(1) Thyroid cancer-related genes

SLC3A2  
ABCA3  
ABCB10  
AFAP1L2  
AGR2  
AKAP13  
AKT1  
ADPRHL2  
BCAS3  
BMP2K  
CALCOCO1  
CDH1  
CTSH  
CPQ  
CCDC6  
CDK13  
CDKN1B  
ITGB3BP  
C8orf4  
TRIP10  
CLUAP1  
CNIH1  
CNTN4  
C16orf58  
CREB1  
CTNBL1  
CST4  
DCUN1D1  
DDR1  
DHRS3  
SDHB  
SDHD  
DICER1  
DUSP23  
DUSP26  
EAF2  
ELP3  
ENO1  
EP300

FAM110B  
FAM83A  
FCRL3  
FGF10  
FGF2  
FGF8  
FHIT  
FLNB  
FLNC  
GAL3ST4  
GADD45GIP1  
GATA3  
GDPD5  
GALNT10  
GALNT12  
GNAS  
GOLGA5  
AGPAT9  
GPR56  
HR  
HEMGN  
HPN  
HID1  
HIPK2  
HSPB1  
HOXA3  
INSR  
ISLR  
ITPA  
JMJD1C  
KAT6B  
KIDINS220  
KDM8  
KLLN  
KISS1  
KISS1R  
KIT  
CAMKK2  
KLK14  
KLK15  
KLK6  
KLK7  
PKM  
RPS6KA1

RPS6KA2  
LAMP3  
SLC7A5  
LDOC1  
LGR4  
LRP1B  
LRP2  
LHCGR  
MTDH  
LZTFL1  
MAP3K8  
MARK4  
MED14  
MET  
MLH1  
MOB1A  
MOB1B  
ABCC2  
MTUS1  
MUC1  
CD164  
MUC4  
MYH14  
MYOT  
NAA15  
NCOA2  
NCOA1  
NCOA3  
NCOA4  
NCOA6  
NDUFA13  
FAM129A  
NOL7  
NSD1  
NTRK1  
NUCKS1  
NUPR1  
KIAA0101  
TRIP13  
PCM1  
MPO  
PGAP3  
PI15  
PIK3CA

PLAGL1  
PLK1  
PLK2  
PKMYT1  
PROM2  
PSMC5  
PRUNE2  
PRUNE  
PSMB6  
PSME3  
PTEN  
PTK7  
PTPRJ  
RARB  
HRAS  
ERC1  
RET  
RILP  
RPL6  
RNF135  
RNF139  
RNF213  
RNF14  
RREB1  
RXFP2  
S100A8  
S100A9  
SLC35F6  
SAA1  
SASH1  
SLC5A8  
SCN9A  
SEP15  
SCGB1D1  
SCGB2A1  
SIGMAR1  
SHH  
ST6GALNAC6  
SIRT7  
SMAD3  
SORL1  
SORT1  
SPDYA  
SRA1

SSX1  
SSX2  
STK33  
SYDE2  
TMEM184C  
TP53INP2  
TACC2  
TBX1  
TNS3  
TFG  
THRA  
TRIM24  
TINAGL1  
TMEM205  
TMEM234  
TNFSF11  
TNFSF13  
TOPORS  
TPM3  
TPR  
TNFRSF11B  
THRAP3  
TRERF1  
TRIM27  
TRIM33  
TRIB1  
TRIP4  
TRIP12  
TSHB  
TSHR  
TTBK1  
TTR  
TTLL3  
UBE2V1  
AXL  
WNT4  
ZNF197  
ZNF331  
THRB  
CDKN2A  
WWOX  
TP73  
CDC73  
RASSF2

DAPK1  
ERRFI1  
TIMP3  
PRKAR1A  
RASSF10  
MST1  
ADPRH  
NOTCH1  
UCHL1  
SSTR2  
FLT1  
IL10  
RAB23  
PAM  
E2F3  
INSL3  
GPT  
S100A6  
IL6R  
SERPINA1  
IFI16  
DIO1  
JUND  
TSG101  
SKP2  
DAO  
MCM7  
NTRK2  
BRCA1  
CCK  
PAX8  
RASSF1  
GSTT1  
VDR  
FGFR1  
CDC25B  
PGP  
GHRH  
BRCA2  
ABCG2  
WNT5A  
XRCC1  
CYP1A1  
CD82

LSM7  
SSTR3  
BRD4  
CREM  
FGD3  
SOCS1  
NNMT  
SSTR5  
NMTC1  
COX1  
JUNB  
CRH  
PRLR  
NF1  
DCN  
HMGA1  
EIF4E  
GAS6  
PDK1  
IL6  
CITED1  
TIMP1  
CD68  
CASR  
DPP4  
CTNNB1  
PDE4A  
GFRA1  
CD40  
NRAS  
VIP  
GSTP1  
E2F4  
TTK  
CDC25A  
GFRA3  
ID1  
WRN  
S100A2  
FGFR3  
IL8  
COX2  
BAX  
GPC3

AES  
FRS2  
DDC  
FUT8  
SYNGR2  
EGF  
CDKN1A  
MT3  
DUOX2  
S100A4  
TPO  
DOK1  
MIR187  
HK2  
GFRA2  
GRK5  
FLT3  
CDX2  
BUB1  
STAT3  
TCEAL4  
CD97  
GAPDH  
CAPN5  
TIMM44  
CD34  
MICA  
RLN2  
VGF  
MMP11  
TTF1  
TTF2  
APOB  
BCL2  
WT1  
TERT  
CD36  
RPH3AL  
AR  
FAS  
MINPP1  
NTRK3  
PRL  
HGF



CD44  
PGR  
EPO  
MGMT  
MCM5  
PTH  
DCK  
AFP  
MMP9  
RXRG  
NDRG1  
SRC  
VCP  
MIR146A  
RBP3  
CD63  
MIR222  
LIF  
SHBG  
CRYAB  
TIMP2  
S100B  
SLC26A4  
CDK4  
TK1  
QPCT  
BRAF  
MMP1  
GSTO1  
SPP1  
MT1G  
CRABP1  
TGFA  
SFTP  
SSTR1  
GAB1  
DIO2  
TLR3  
FRA16D  
TRH  
FCGBP  
SERP1  
HDAC1  
ERBB2

MNG1  
DUOX1  
AKAP9  
STC1  
CD5  
BMP7  
C1D  
TNF  
EGFR  
TCO  
E2F1  
APC  
CYP3A5  
IGFBP1  
ZNF20  
VHL  
ETS1  
CSNK1G2  
MDM2  
CXCR4  
LPA  
ID3  
CALCA  
SST  
PCNA  
MEN1  
IL1B  
TFF1  
NPY  
CIITA  
TFF3  
CYP2D6  
MCL1  
CDK2  
SMAD7  
EGR1  
IL2  
PIN1  
FGFR4  
MIR146B  
AHR  
MMP2  
FN1  
CCL2

GDNF  
IGF1  
EPOR  
G6PD  
ECM1  
GSTM1  
ICAM1  
CD55  
RB1

(2) Thyroid cancer-related chemicals

CID000000264  
CID000000807  
CID000001322  
CID000002078  
CID000003213  
CID000003715  
CID000004616  
CID000004763  
CID000005234  
CID000005323  
CID000005327  
CID000005569  
CID000005921  
CID000005978  
CID000007416  
CID000007567  
CID000007577  
CID000007579  
CID000008765  
CID000011164  
CID000011975  
CID000012699  
CID000018692  
CID000023978  
CID000031369  
CID000031404  
CID000031703  
CID000039385  
CID000053462  
CID000053665  
CID000064139  
CID000064142  
CID000091480

CID000441140  
CID000444795  
CID000445154  
CID000657298  
CID001349907  
CID002723650  
CID002723790  
CID003034368  
CID005353562  
CID009562060  
CID023673461
