# Supplementary material for: Identification of Novel Thyroid Cancer-Related Genes and Chemicals Using Shortest Path Algorithm
Source: Biomed Res Int. 2015 Mar 22;2015:964795. doi: 10.1155/2015/964795 (PMC4385622; doi:10.1155/2015/964795)
Supplement: Supplementary file 1 — The Supplementary Material contains six files. In detail, Online Supporting Information S1 lists thyroid cancer-related genes and chemicals; Online Supporting Information S2 lists 636 candidate genes and 174 candidate chemicals; Online Supporting Information S3 lists 169 significant candidate genes and 49 significant candidate chemicals; Online Supporting Information S4 lists KEGG enrichment results of 169 significant candidate genes; Online Supporting Information S5 lists GO enrichment results of 169 significant candidate genes; Online Supporting Information S6 lists the discussion of 29 significant candidate chemicals. [file 964795.f1.zip]

Archive with 6 entries (6 files):
- Supp-S1.pdf
- Supp-S2.pdf
- Supp-S3.pdf
- Supp-S4.xlsx
- Supp-S5.xlsx
- Supp-S6.pdf
