# Supplementary material for: Identification of Novel Thyroid Cancer-Related Genes and Chemicals Using Shortest Path Algorithm
Source: Biomed Res Int. 2015 Mar 22;2015:964795. doi: 10.1155/2015/964795 (PMC4385622; doi:10.1155/2015/964795)
Supplement: Supplementary file 1 — The Supplementary Material contains six files. In detail, Online Supporting Information S1 lists thyroid cancer-related genes and chemicals; Online Supporting Information S2 lists 636 candidate genes and 174 candidate chemicals; Online Supporting Information S3 lists 169 significant candidate genes and 49 significant candidate chemicals; Online Supporting Information S4 lists KEGG enrichment results of 169 significant candidate genes; Online Supporting Information S5 lists GO enrichment results of 169 significant candidate genes; Online Supporting Information S6 lists the discussion of 29 significant candidate chemicals. [file 964795.f1.zip › Supp-S4.xlsx]

## Sheet: Sheet1
Online Supporting Information S4： KEGG enrichment results of 169 significant candidate genes
Category	Term	Count	%	PValue	Genes	List Total	Pop Hits	Pop Total	Fold Enrichment	Bonferroni	Benjamini	FDR
KEGG_PATHWAY	hsa05200:Pathways in cancer	20	11.8343	2.0683e-05	FGFR2, FGF6, DVL3, EPAS1, PPARG, CREBBP, SPI1, NFKB1, CTNNA1, ARNT, FZD6, SMO, CCND1, KRAS, HIF1A, PLCG1, PTCH1, IKBKB, FH, FGF4	103	328	5085	3.0103	0.00245828	0.00245828	0.0237041
KEGG_PATHWAY	hsa05211:Renal cell carcinoma	7	4.14201	0.00260993	HIF1A, KRAS, EPAS1, CREBBP, ARNT, FH, PTPN11	103	70	5085	4.93689	0.267277	0.144008	2.95098
KEGG_PATHWAY	hsa04722:Neurotrophin signaling pathway	9	5.32544	0.00321632	KRAS, PLCG1, NTF3, YWHAB, NFKB1, SHC1, MAPKAPK2, IKBKB, PTPN11	103	124	5085	3.58323	0.318432	0.119958	3.62512
KEGG_PATHWAY	hsa04630:Jak-STAT signaling pathway	10	5.91716	0.00366315	LEP, STAT6, CCND1, IL7, IL6ST, IL10RA, CREBBP, IL13, IL7R, PTPN11	103	155	5085	3.18509	0.353845	0.10343	4.11915
KEGG_PATHWAY	hsa00980:Metabolism of xenobiotics by cytochrome P450	6	3.5503	0.00671086	CYP3A43, CYP3A4, GSTA4, CYP2C9, CYP2B6, UGT2B7	103	60	5085	4.93689	0.551248	0.148075	7.42756
KEGG_PATHWAY	hsa00982:Drug metabolism	6	3.5503	0.00770505	CYP3A43, CYP3A4, GSTA4, CYP2C9, CYP2B6, UGT2B7	103	62	5085	4.77764	0.601661	0.142221	8.48403
KEGG_PATHWAY	hsa05220:Chronic myeloid leukemia	6	3.5503	0.0167615	CCND1, KRAS, NFKB1, SHC1, IKBKB, PTPN11	103	75	5085	3.94951	0.866216	0.249759	17.6134
KEGG_PATHWAY	hsa00830:Retinol metabolism	5	2.95858	0.0224242	CYP3A43, CYP3A4, CYP2C9, CYP2B6, UGT2B7	103	54	5085	4.5712	0.932718	0.286346	22.891
KEGG_PATHWAY	hsa05221:Acute myeloid leukemia	5	2.95858	0.0283204	CCND1, KRAS, SPI1, NFKB1, IKBKB	103	58	5085	4.25594	0.967247	0.316045	28.0567
KEGG_PATHWAY	hsa05215:Prostate cancer	6	3.5503	0.0324094	FGFR2, CCND1, KRAS, CREBBP, NFKB1, IKBKB	103	89	5085	3.32824	0.980171	0.324337	31.4514
KEGG_PATHWAY	hsa04920:Adipocytokine signaling pathway	5	2.95858	0.0446892	LEP, TNFRSF1B, NFKB1, IKBKB, PTPN11	103	67	5085	3.68425	0.995663	0.39018	40.7866
KEGG_PATHWAY	hsa05120:Epithelial cell signaling in Helicobacter pylori infection	5	2.95858	0.0467763	PLCG1, ADAM17, NFKB1, IKBKB, PTPN11	103	68	5085	3.63007	0.996657	0.378155	42.2525
KEGG_PATHWAY	hsa04620:Toll-like receptor signaling pathway	6	3.5503	0.0513592	TBK1, LY96, TICAM1, NFKB1, TLR4, IKBKB	103	101	5085	2.93281	0.998116	0.382846	45.356
KEGG_PATHWAY	hsa04662:B cell receptor signaling pathway	5	2.95858	0.0628812	CR2, KRAS, CD81, NFKB1, IKBKB	103	75	5085	3.29126	0.99956	0.424223	52.4979
KEGG_PATHWAY	hsa04060:Cytokine-cytokine receptor interaction	10	5.91716	0.0785031	LEP, TNFRSF1B, TNFRSF11A, PPBP, IL7, IL6ST, IL10RA, IL13, IL7R, CXCL12	103	262	5085	1.88431	0.99994	0.477221	60.823
KEGG_PATHWAY	hsa04670:Leukocyte transendothelial migration	6	3.5503	0.0873653	VCAM1, PLCG1, ACTN1, CTNNA1, CXCL12, PTPN11	103	118	5085	2.51028	0.999981	0.493349	64.9307
KEGG_PATHWAY	hsa05014:Amyotrophic lateral sclerosis (ALS)	4	2.36686	0.0894268	GPX1, TNFRSF1B, DERL1, CAT	103	53	5085	3.72596	0.999986	0.480956	65.828
KEGG_PATHWAY	hsa04623:Cytosolic DNA-sensing pathway	4	2.36686	0.0973805	TMEM173, TBK1, NFKB1, IKBKB	103	55	5085	3.59047	0.999995	0.492031	69.0972
KEGG_PATHWAY	hsa05217:Basal cell carcinoma	4	2.36686	0.0973805	DVL3, SMO, PTCH1, FZD6	103	55	5085	3.59047	0.999995	0.492031	69.0972
