# Supplementary material for: Identification of Novel Thyroid Cancer-Related Genes and Chemicals Using Shortest Path Algorithm
Source: Biomed Res Int. 2015 Mar 22;2015:964795. doi: 10.1155/2015/964795 (PMC4385622; doi:10.1155/2015/964795)
Supplement: Supplementary file 1 — The Supplementary Material contains six files. In detail, Online Supporting Information S1 lists thyroid cancer-related genes and chemicals; Online Supporting Information S2 lists 636 candidate genes and 174 candidate chemicals; Online Supporting Information S3 lists 169 significant candidate genes and 49 significant candidate chemicals; Online Supporting Information S4 lists KEGG enrichment results of 169 significant candidate genes; Online Supporting Information S5 lists GO enrichment results of 169 significant candidate genes; Online Supporting Information S6 lists the discussion of 29 significant candidate chemicals. [file 964795.f1.zip › Supp-S5.xlsx]

## Sheet: Sheet1
Online Supporting Information S5: GO enrichment results of 169 significant candidate genes
Category	Term	Count	%	PValue	Genes	List Total	Pop Hits	Pop Total	Fold Enrichment	Bonferroni	Benjamini	FDR
GOTERM_BP_FAT	GO:0042127~regulation of cell proliferation	35	20.7101	2.51502e-11	DLC1, ING5, FGFR2, MVD, IL6ST, CLU, PPARG, IL13, VIPR1, ADA, GHRHR, ARNT, VCAM1, STAT6, GPX1, KRAS, TNFRSF11A, TICAM1, SHC1, ITCH, TCF3, FGF4, MUC2, CCKBR, GNRH1, IL7, CAPN1, SMO, CCND1, HIF1A, CD81, ADAM17, PTCH1, SMARCA2, LRP5	160	787	13528	3.76017	5.29915e-08	5.29915e-08	4.35044e-08
GOTERM_BP_FAT	GO:0008284~positive regulation of cell proliferation	25	14.7929	9.29268e-11	FGFR2, MVD, IL6ST, CLU, IL13, VIPR1, ADA, GHRHR, ARNT, VCAM1, TNFRSF11A, KRAS, TICAM1, SHC1, TCF3, FGF4, CCKBR, IL7, CAPN1, SMO, CCND1, HIF1A, CD81, ADAM17, LRP5	160	414	13528	5.10568	1.95797e-07	9.78985e-08	1.60743e-07
GOTERM_BP_FAT	GO:0010604~positive regulation of macromolecule metabolic process	34	20.1183	1.03379e-09	DLC1, ING5, MYOD1, IL6ST, SNCA, PPARG, SPI1, TLR4, NFKB1, ARNT, STAT6, ERCC6, TICAM1, NKX2-1, SHC1, ITCH, ASF1A, TCF3, DVL3, CEBPB, EPAS1, NTF3, CREBBP, ESR1, FURIN, NRIP1, CCND1, HIF1A, CD81, NEUROD1, ADAM17, SELE, SMARCA2, NR5A1	160	857	13528	3.35438	2.1782e-06	7.26068e-07	1.78824e-06
GOTERM_BP_FAT	GO:0010033~response to organic substance	31	18.3432	1.12223e-09	ADCY2, DERL1, IL6ST, SLC6A3, SNCA, COL3A1, PPARG, TLR4, NR3C1, LATS1, GHRHR, STAT6, KRAS, TICAM1, NKX2-1, SHC1, GNRH1, LY96, SELL, ESR1, MMP14, PTPN11, LEP, GCG, CCND1, NEUROD1, ADAM17, PTCH1, PARP1, SELE, VLDLR	160	721	13528	3.6353	2.36453e-06	5.91134e-07	1.94121e-06
GOTERM_BP_FAT	GO:0002684~positive regulation of immune system process	17	10.0592	1.99373e-08	CR2, IL7, C3, IL6ST, CLU, KLRK1, IL13, TLR4, IL7R, CXCL12, ADA, VCAM1, STAT6, TICAM1, ADAM17, ITCH, TCF3	160	238	13528	6.03929	4.20071e-05	8.40156e-06	3.44873e-05
GOTERM_BP_FAT	GO:0032101~regulation of response to external stimulus	14	8.28402	4.58214e-08	MYOD1, C3, IL6ST, SLC6A3, PPARG, TLR4, CXCL12, ADA, ANXA2, LEP, GPX1, TNFRSF1B, ADAM17, SELE	160	159	13528	7.44465	9.65411e-05	1.60908e-05	7.92611e-05
GOTERM_BP_FAT	GO:0051173~positive regulation of nitrogen compound metabolic process	26	15.3846	1.26898e-07	ING5, MYOD1, PPARG, KLRK1, SPI1, NFKB1, GHRHR, ARNT, STAT6, AGTR2, ERCC6, TICAM1, NKX2-1, SHC1, ASF1A, TCF3, DVL3, CEBPB, NTF3, EPAS1, CREBBP, NRIP1, HIF1A, NEUROD1, SMARCA2, NR5A1	160	644	13528	3.41351	0.000267339	3.81957e-05	0.000219506
GOTERM_BP_FAT	GO:0010647~positive regulation of cell communication	18	10.6509	3.24816e-07	TBK1, IL6ST, SNCA, ESR1, TLR4, FURIN, ADA, GHRHR, ARNT, PTPN11, LEP, GPX1, HIF1A, KRAS, ITGA8, TICAM1, ADAM17, CAT	160	329	13528	4.62584	0.000684154	8.55449e-05	0.000561861
GOTERM_BP_FAT	GO:0009967~positive regulation of signal transduction	17	10.0592	3.85485e-07	TBK1, IL6ST, ESR1, TLR4, FURIN, GHRHR, ADA, ARNT, PTPN11, LEP, GPX1, HIF1A, KRAS, ITGA8, TICAM1, ADAM17, CAT	160	295	13528	4.87237	0.000811887	9.02423e-05	0.000666803
GOTERM_BP_FAT	GO:0031328~positive regulation of cellular biosynthetic process	26	15.3846	4.06779e-07	ING5, MYOD1, PPARG, KLRK1, SPI1, NFKB1, TLR4, GHRHR, ARNT, STAT6, AGTR2, TICAM1, NKX2-1, SHC1, ASF1A, TCF3, DVL3, CEBPB, EPAS1, NTF3, CREBBP, NRIP1, HIF1A, NEUROD1, SMARCA2, NR5A1	160	685	13528	3.2092	0.000856716	8.57046e-05	0.000703637
GOTERM_BP_FAT	GO:0009891~positive regulation of biosynthetic process	26	15.3846	5.3258e-07	ING5, MYOD1, PPARG, KLRK1, SPI1, NFKB1, TLR4, GHRHR, ARNT, STAT6, AGTR2, TICAM1, NKX2-1, SHC1, ASF1A, TCF3, DVL3, CEBPB, EPAS1, NTF3, CREBBP, NRIP1, HIF1A, NEUROD1, SMARCA2, NR5A1	160	695	13528	3.16302	0.00112152	0.000102008	0.000921244
GOTERM_BP_FAT	GO:0050867~positive regulation of cell activation	11	6.50888	7.0555e-07	STAT6, VCAM1, IL7, IL6ST, TICAM1, KLRK1, IL13, TLR4, IL7R, TCF3, ADA	160	111	13528	8.37883	0.00148549	0.000123875	0.00122044
GOTERM_BP_FAT	GO:0050865~regulation of cell activation	13	7.69231	1.03141e-06	IL7, IL6ST, SNCA, KLRK1, IL13, TLR4, IL7R, ADA, VCAM1, STAT6, TICAM1, ITCH, TCF3	160	175	13528	6.28086	0.00217081	0.000167153	0.00178409
GOTERM_BP_FAT	GO:0051251~positive regulation of lymphocyte activation	10	5.91716	2.0169e-06	STAT6, VCAM1, IL7, IL6ST, TICAM1, KLRK1, IL13, IL7R, TCF3, ADA	160	97	13528	8.71649	0.0042406	0.000303498	0.00348875
GOTERM_BP_FAT	GO:0042592~homeostatic process	26	15.3846	2.18854e-06	BBS4, DERL1, IL6ST, PPARG, SNCA, SLC7A8, IL7R, CXCL12, GHRHR, GPX1, KCNQ1, FH, MUC2, NTF3, CCKBR, EPAS1, IL7, CREBBP, PTPN11, HIF1A, SLC4A11, NEUROD1, PTCH1, ASNA1, PARP1, IKBKB	160	751	13528	2.92716	0.00460064	0.00030737	0.00378563
GOTERM_BP_FAT	GO:0042981~regulation of apoptosis	27	15.9763	2.27899e-06	DLC1, SNCA, CLU, NFKB1, TLR4, NR3C1, ADA, GPX1, AGTR2, ERCC6, KRAS, TICAM1, CAT, FGF4, MUC2, CEBPB, NTF3, GNRH1, IL7, YWHAB, ESR1, ACTN1, FURIN, SMO, NEUROD1, ADAM17, IKBKB	160	804	13528	2.83937	0.00479032	0.000300069	0.00394208
GOTERM_BP_FAT	GO:0043067~regulation of programmed cell death	27	15.9763	2.73381e-06	DLC1, SNCA, CLU, NFKB1, TLR4, NR3C1, ADA, GPX1, AGTR2, ERCC6, KRAS, TICAM1, CAT, FGF4, MUC2, CEBPB, NTF3, GNRH1, IL7, YWHAB, ESR1, ACTN1, FURIN, SMO, NEUROD1, ADAM17, IKBKB	160	812	13528	2.81139	0.0057436	0.000338775	0.0047288
GOTERM_BP_FAT	GO:0010941~regulation of cell death	27	15.9763	2.92488e-06	DLC1, SNCA, CLU, NFKB1, TLR4, NR3C1, ADA, GPX1, AGTR2, ERCC6, KRAS, TICAM1, CAT, FGF4, MUC2, CEBPB, NTF3, GNRH1, IL7, YWHAB, ESR1, ACTN1, FURIN, SMO, NEUROD1, ADAM17, IKBKB	160	815	13528	2.80104	0.00614378	0.000342315	0.00505929
GOTERM_BP_FAT	GO:0051254~positive regulation of RNA metabolic process	20	11.8343	3.69253e-06	DVL3, MYOD1, CEBPB, EPAS1, NTF3, PPARG, CREBBP, SPI1, NFKB1, ARNT, NRIP1, STAT6, ERCC6, HIF1A, NKX2-1, NEUROD1, TCF3, ASF1A, SMARCA2, NR5A1	160	481	13528	3.51559	0.00774999	0.000409399	0.00638709
GOTERM_BP_FAT	GO:0045935~positive regulation of nucleobase, nucleoside, nucleotide and nucleic acid metabolic process	23	13.6095	3.83065e-06	ING5, DVL3, MYOD1, CEBPB, EPAS1, NTF3, PPARG, CREBBP, SPI1, NFKB1, GHRHR, ARNT, NRIP1, STAT6, ERCC6, HIF1A, NKX2-1, NEUROD1, SHC1, TCF3, ASF1A, SMARCA2, NR5A1	160	624	13528	3.11643	0.00803871	0.000403478	0.00662599
GOTERM_BP_FAT	GO:0002694~regulation of leukocyte activation	12	7.10059	4.11423e-06	STAT6, VCAM1, IL7, IL6ST, TICAM1, SNCA, KLRK1, IL13, ITCH, IL7R, TCF3, ADA	160	166	13528	6.11205	0.00863123	0.00041271	0.00711648
GOTERM_BP_FAT	GO:0043066~negative regulation of apoptosis	17	10.0592	4.21345e-06	CEBPB, GNRH1, IL7, CLU, SNCA, ESR1, NFKB1, FURIN, ADA, GPX1, SMO, KRAS, ADAM17, NEUROD1, CAT, IKBKB, FGF4	160	354	13528	4.06031	0.00883848	0.000403453	0.00728811
GOTERM_BP_FAT	GO:0002696~positive regulation of leukocyte activation	10	5.91716	4.23569e-06	STAT6, VCAM1, IL7, IL6ST, TICAM1, KLRK1, IL13, IL7R, TCF3, ADA	160	106	13528	7.97642	0.00888492	0.000387952	0.00732658
GOTERM_BP_FAT	GO:0043069~negative regulation of programmed cell death	17	10.0592	5.03818e-06	CEBPB, GNRH1, IL7, CLU, SNCA, ESR1, NFKB1, FURIN, ADA, GPX1, SMO, KRAS, ADAM17, NEUROD1, CAT, IKBKB, FGF4	160	359	13528	4.00376	0.0105593	0.000442213	0.0087146
GOTERM_BP_FAT	GO:0060548~negative regulation of cell death	17	10.0592	5.21952e-06	CEBPB, GNRH1, IL7, CLU, SNCA, ESR1, NFKB1, FURIN, ADA, GPX1, SMO, KRAS, ADAM17, NEUROD1, CAT, IKBKB, FGF4	160	360	13528	3.99264	0.0109373	0.000439805	0.00902825
GOTERM_BP_FAT	GO:0010557~positive regulation of macromolecule biosynthetic process	23	13.6095	8.10516e-06	ING5, DVL3, MYOD1, CEBPB, EPAS1, NTF3, PPARG, CREBBP, SPI1, NFKB1, TLR4, ARNT, NRIP1, STAT6, HIF1A, TICAM1, NKX2-1, NEUROD1, SHC1, TCF3, ASF1A, SMARCA2, NR5A1	160	654	13528	2.97347	0.0169327	0.000656617	0.0140193
GOTERM_BP_FAT	GO:0006351~transcription, DNA-dependent	15	8.87574	8.8831e-06	TAF1C, BGLAP, CEBPB, EPAS1, ELL, ESR1, NFKB1, NR3C1, ARNT, ERCC6, HIF1A, RTF1, SMARCA5, PARP1, NR5A1	160	292	13528	4.34332	0.0185427	0.000692974	0.0153647
GOTERM_BP_FAT	GO:0051249~regulation of lymphocyte activation	11	6.50888	9.62754e-06	STAT6, VCAM1, IL7, IL6ST, TICAM1, KLRK1, IL13, ITCH, IL7R, TCF3, ADA	160	148	13528	6.28412	0.020081	0.000724213	0.0166522
GOTERM_BP_FAT	GO:0032774~RNA biosynthetic process	15	8.87574	1.03662e-05	TAF1C, BGLAP, CEBPB, EPAS1, ELL, ESR1, NFKB1, NR3C1, ARNT, ERCC6, HIF1A, RTF1, SMARCA5, PARP1, NR5A1	160	296	13528	4.28463	0.0216049	0.00075288	0.0179298
GOTERM_BP_FAT	GO:0040008~regulation of growth	16	9.46746	1.18009e-05	ING5, MYOD1, IL7, SLC6A3, PPARG, GHRHR, PTPN11, LEP, NOV, BBS2, AGTR2, ADAM17, SHC1, PTCH1, ITCH, PARP1	160	341	13528	3.96716	0.0245581	0.000828479	0.0204111
GOTERM_BP_FAT	GO:0045893~positive regulation of transcription, DNA-dependent	19	11.2426	1.26416e-05	DVL3, MYOD1, CEBPB, EPAS1, NTF3, PPARG, CREBBP, SPI1, NFKB1, ARNT, NRIP1, STAT6, HIF1A, NKX2-1, NEUROD1, TCF3, ASF1A, SMARCA2, NR5A1	160	477	13528	3.36782	0.0262844	0.000858857	0.021865
GOTERM_BP_FAT	GO:0010628~positive regulation of gene expression	21	12.426	1.55791e-05	ING5, DVL3, MYOD1, CEBPB, EPAS1, NTF3, PPARG, CREBBP, SPI1, ESR1, NFKB1, ARNT, NRIP1, STAT6, HIF1A, NKX2-1, NEUROD1, TCF3, ASF1A, SMARCA2, NR5A1	160	581	13528	3.05602	0.0322925	0.00102527	0.026945
GOTERM_BP_FAT	GO:0040012~regulation of locomotion	12	7.10059	1.64619e-05	DLC1, BBS4, MUC2, BBS2, AGTR2, HIF1A, IL6ST, SNCA, ADAM17, FURIN, CXCL12, ADA	160	192	13528	5.28437	0.0340908	0.00105052	0.0284716
GOTERM_BP_FAT	GO:0045597~positive regulation of cell differentiation	13	7.69231	1.65438e-05	NTF3, IL7, IL6ST, PPARG, CLU, NFKB1, IL7R, ADA, ARNT, LEP, SMO, HIF1A, NEUROD1	160	229	13528	4.79978	0.0342575	0.00102471	0.0286133
GOTERM_BP_FAT	GO:0051270~regulation of cell motion	12	7.10059	1.72671e-05	DLC1, BBS4, MUC2, BBS2, AGTR2, HIF1A, IL6ST, ADAM17, ACTN1, FURIN, CXCL12, ADA	160	193	13528	5.25699	0.0357283	0.00103895	0.0298642
GOTERM_BP_FAT	GO:0009719~response to endogenous stimulus	17	10.0592	2.2652e-05	ADCY2, GNRH1, PPARG, ESR1, MMP14, LATS1, GHRHR, PTPN11, LEP, GCG, CCND1, KRAS, ADAM17, SHC1, PTCH1, PARP1, VLDLR	160	405	13528	3.54901	0.0466073	0.00132491	0.0391759
GOTERM_BP_FAT	GO:0048585~negative regulation of response to stimulus	9	5.32544	2.27394e-05	LEP, STAT6, GPX1, TNFRSF1B, SLC6A3, PPARG, COL3A1, IL7R, ADA	160	100	13528	7.6095	0.0467828	0.00129409	0.039327
GOTERM_BP_FAT	GO:0006979~response to oxidative stress	11	6.50888	2.35432e-05	GPX1, ERCC6, HIF1A, EPAS1, SNCA, CLU, TLR4, CAT, MMP14, ADA, ARNT	160	164	13528	5.67104	0.0483958	0.00130457	0.0407168
GOTERM_BP_FAT	GO:0051094~positive regulation of developmental process	14	8.28402	2.44641e-05	MYOD1, NTF3, IL7, IL6ST, PPARG, CLU, NFKB1, IL7R, ADA, ARNT, LEP, SMO, HIF1A, NEUROD1	160	278	13528	4.25791	0.0502404	0.00132083	0.0423091
GOTERM_BP_FAT	GO:0009725~response to hormone stimulus	16	9.46746	2.79374e-05	ADCY2, GNRH1, PPARG, ESR1, MMP14, LATS1, GHRHR, PTPN11, LEP, GCG, CCND1, KRAS, SHC1, PTCH1, PARP1, VLDLR	160	367	13528	3.6861	0.0571659	0.00147054	0.0483147
GOTERM_BP_FAT	GO:0050727~regulation of inflammatory response	8	4.73373	3.00698e-05	GPX1, TNFRSF1B, C3, IL6ST, PPARG, TLR4, SELE, ADA	160	76	13528	8.9	0.0613926	0.00154412	0.0520014
GOTERM_BP_FAT	GO:0045944~positive regulation of transcription from RNA polymerase II promoter	16	9.46746	3.16677e-05	MYOD1, CEBPB, NTF3, EPAS1, CREBBP, PPARG, NFKB1, ARNT, NRIP1, STAT6, HIF1A, NKX2-1, NEUROD1, TCF3, SMARCA2, NR5A1	160	371	13528	3.64636	0.0645476	0.00158743	0.0547642
GOTERM_BP_FAT	GO:0032496~response to lipopolysaccharide	8	4.73373	3.27537e-05	LY96, TICAM1, SNCA, ADAM17, NKX2-1, TLR4, SELE, VLDLR	160	77	13528	8.78442	0.0666856	0.00160367	0.0566417
GOTERM_BP_FAT	GO:0045941~positive regulation of transcription	20	11.8343	3.4728e-05	ING5, DVL3, MYOD1, CEBPB, EPAS1, NTF3, PPARG, CREBBP, SPI1, NFKB1, ARNT, NRIP1, STAT6, HIF1A, NKX2-1, NEUROD1, TCF3, ASF1A, SMARCA2, NR5A1	160	564	13528	2.99823	0.0705602	0.00166165	0.060055
GOTERM_BP_FAT	GO:0045444~fat cell differentiation	7	4.14201	3.4888e-05	BBS4, GPX1, BBS2, CCND1, CEBPB, BBS9, PPARG	160	53	13528	11.167	0.0708735	0.00163223	0.0603316
GOTERM_BP_FAT	GO:0050871~positive regulation of B cell activation	6	3.5503	3.83102e-05	STAT6, IL7, TICAM1, IL13, TCF3, ADA	160	33	13528	15.3727	0.0775491	0.00175327	0.0662477
GOTERM_BP_FAT	GO:0006357~regulation of transcription from RNA polymerase II promoter	23	13.6095	4.13905e-05	MYOD1, CEBPB, EPAS1, NTF3, PPARG, CREBBP, SPI1, HIRA, TLE1, NFKB1, ARNT, NRIP1, ZNF174, STAT6, HIF1A, SNF8, SMARCA5, NKX2-1, NEUROD1, TCF3, SMARCA2, CHD4, NR5A1	160	727	13528	2.6749	0.0835169	0.00185385	0.0715725
GOTERM_BP_FAT	GO:0050671~positive regulation of lymphocyte proliferation	7	4.14201	4.32107e-05	VCAM1, IL7, IL6ST, TICAM1, IL13, TCF3, ADA	160	55	13528	10.7609	0.0870251	0.00189501	0.0747188
GOTERM_BP_FAT	GO:0032946~positive regulation of mononuclear cell proliferation	7	4.14201	4.793e-05	VCAM1, IL7, IL6ST, TICAM1, IL13, TCF3, ADA	160	56	13528	10.5687	0.0960589	0.00205892	0.0828762
GOTERM_BP_FAT	GO:0070665~positive regulation of leukocyte proliferation	7	4.14201	4.793e-05	VCAM1, IL7, IL6ST, TICAM1, IL13, TCF3, ADA	160	56	13528	10.5687	0.0960589	0.00205892	0.0828762
GOTERM_BP_FAT	GO:0007242~intracellular signaling cascade	32	18.9349	5.28997e-05	NRTN, ADCY2, TBK1, IL6ST, TLR4, MAPKAPK2, NR3C1, VIPR1, LATS1, GHRHR, AGTR2, ERCC6, KRAS, TICAM1, SHC1, DVL3, CCKBR, LY96, YWHAB, ESR1, NRIP1, PTPN11, LEP, GCG, SS18, CCND1, PLCG1, CD81, COL1A2, NEUROD1, IKBKB, SELE	160	1256	13528	2.15414	0.105475	0.00222677	0.0914656
GOTERM_BP_FAT	GO:0050670~regulation of lymphocyte proliferation	8	4.73373	5.33169e-05	VCAM1, IL7, IL6ST, TICAM1, IL13, ITCH, TCF3, ADA	160	83	13528	8.1494	0.106261	0.00220036	0.0921867
GOTERM_BP_FAT	GO:0001817~regulation of cytokine production	11	6.50888	5.46809e-05	HIF1A, CEBPB, IL6ST, TICAM1, PPARG, KLRK1, ADAM17, NFKB1, TLR4, FURIN, ARNT	160	181	13528	5.1384	0.108826	0.00221323	0.0945439
GOTERM_BP_FAT	GO:0070663~regulation of leukocyte proliferation	8	4.73373	5.75963e-05	VCAM1, IL7, IL6ST, TICAM1, IL13, ITCH, TCF3, ADA	160	84	13528	8.05238	0.114284	0.00228717	0.0995824
GOTERM_BP_FAT	GO:0032944~regulation of mononuclear cell proliferation	8	4.73373	5.75963e-05	VCAM1, IL7, IL6ST, TICAM1, IL13, ITCH, TCF3, ADA	160	84	13528	8.05238	0.114284	0.00228717	0.0995824
GOTERM_BP_FAT	GO:0006955~immune response	22	13.0178	5.79433e-05	CR2, CEBPB, TBK1, IL7, C3, LY96, CLU, PPARG, SNCA, IL13, TLR4, OAS2, VIPR1, IL7R, CXCL12, ADA, TNFRSF1B, TMEM173, PPBP, C1QBP, TICAM1, ADAM17	160	690	13528	2.6958	0.114931	0.00225837	0.100182
GOTERM_BP_FAT	GO:0044093~positive regulation of molecular function	20	11.8343	5.82121e-05	DLC1, ADCY2, CCKBR, YWHAB, TLR4, GHRHR, PTPN11, CCND1, AGTR2, ERCC6, KRAS, HIF1A, TICAM1, CD81, ADAM17, SHC1, CAT, IKBKB, SELE, VLDLR	160	586	13528	2.88567	0.115433	0.00222763	0.100647
GOTERM_BP_FAT	GO:0002237~response to molecule of bacterial origin	8	4.73373	6.69999e-05	LY96, TICAM1, SNCA, ADAM17, NKX2-1, TLR4, SELE, VLDLR	160	86	13528	7.86512	0.131661	0.00251778	0.115832
GOTERM_BP_FAT	GO:0030890~positive regulation of B cell proliferation	5	2.95858	7.68746e-05	IL7, TICAM1, IL13, TCF3, ADA	160	20	13528	21.1375	0.149543	0.00283774	0.132893
GOTERM_BP_FAT	GO:0016568~chromatin modification	13	7.69231	9.50238e-05	ING5, BRD1, CREBBP, HIRA, NR3C1, RTF1, SMARCA5, PAF1, SMARCA2, BAZ2A, ASF1A, CHD4, KDM4D	160	274	13528	4.0115	0.181453	0.0034462	0.164243
GOTERM_BP_FAT	GO:0006366~transcription from RNA polymerase II promoter	12	7.10059	0.000100194	TAF1C, BGLAP, ERCC6, HIF1A, CEBPB, EPAS1, ELL, NFKB1, NR3C1, PARP1, ARNT, NR5A1	160	234	13528	4.3359	0.190322	0.00357189	0.173172
GOTERM_BP_FAT	GO:0016477~cell migration	13	7.69231	0.000101804	PLAT, NRTN, MMP14, CXCL12, VCAM1, GPX1, SMO, HIF1A, ADAM17, NKX2-1, SELE, SELPLG, LRP5	160	276	13528	3.98243	0.193064	0.0035688	0.175952
GOTERM_BP_FAT	GO:0034599~cellular response to oxidative stress	6	3.5503	0.000141346	GPX1, HIF1A, EPAS1, SNCA, CAT, ARNT	160	43	13528	11.7977	0.257577	0.00487066	0.244216
GOTERM_BP_FAT	GO:0051240~positive regulation of multicellular organismal process	12	7.10059	0.000145021	AGTR2, HIF1A, IL6ST, SLC6A3, TICAM1, SNCA, KLRK1, ADAM17, TLR4, GHRHR, ADA, ARNT	160	244	13528	4.1582	0.263305	0.00491659	0.250558
GOTERM_BP_FAT	GO:0001568~blood vessel development	12	7.10059	0.00015032	PLAT, FGF6, SMO, GPX1, AGTR2, HIF1A, EPAS1, COL3A1, COL1A2, MMP14, CXCL12, ANXA2	160	245	13528	4.14122	0.271486	0.00501514	0.259703
GOTERM_BP_FAT	GO:0035270~endocrine system development	7	4.14201	0.000156074	SLC6A3, CLU, NKX2-1, NEUROD1, NR3C1, GHRHR, NR5A1	160	69	13528	8.57754	0.280266	0.00512547	0.269631
GOTERM_BP_FAT	GO:0009611~response to wounding	18	10.6509	0.000166086	PLAT, CR2, CEBPB, C3, LY96, CLU, COL3A1, IL13, NFKB1, TLR4, SMO, GPX1, TNFRSF1B, HIF1A, TICAM1, ADAM17, ITCH, SELE	160	530	13528	2.87151	0.295292	0.00536971	0.286904
GOTERM_BP_FAT	GO:0032870~cellular response to hormone stimulus	9	5.32544	0.000172699	GCG, ADCY2, PPARG, SHC1, PARP1, LATS1, GHRHR, VLDLR, PTPN11	160	133	13528	5.72143	0.305045	0.00549859	0.298312
GOTERM_BP_FAT	GO:0001666~response to hypoxia	9	5.32544	0.000181858	PLAT, HIF1A, EPAS1, CREBBP, ADAM17, MMP14, ADA, ARNT, VLDLR	160	134	13528	5.67873	0.31833	0.00570322	0.314109
GOTERM_BP_FAT	GO:0001944~vasculature development	12	7.10059	0.000185707	PLAT, FGF6, SMO, GPX1, AGTR2, HIF1A, EPAS1, COL3A1, COL1A2, MMP14, CXCL12, ANXA2	160	251	13528	4.04223	0.323836	0.00573818	0.320747
GOTERM_BP_FAT	GO:0032768~regulation of monooxygenase activity	5	2.95858	0.000191733	AGTR2, HIF1A, KRAS, SNCA, NFKB1	160	25	13528	16.91	0.33237	0.00583827	0.33114
GOTERM_BP_FAT	GO:0002791~regulation of peptide secretion	6	3.5503	0.000195651	LEP, GCG, NEUROD1, KCNQ1, GHRHR, PTPN11	160	46	13528	11.0283	0.337859	0.00587236	0.337894
GOTERM_BP_FAT	GO:0070482~response to oxygen levels	9	5.32544	0.000257803	PLAT, HIF1A, EPAS1, CREBBP, ADAM17, MMP14, ADA, ARNT, VLDLR	160	141	13528	5.39681	0.419149	0.00762236	0.445008
GOTERM_BP_FAT	GO:0051674~localization of cell	13	7.69231	0.000273966	PLAT, NRTN, MMP14, CXCL12, VCAM1, GPX1, SMO, HIF1A, ADAM17, NKX2-1, SELE, SELPLG, LRP5	160	307	13528	3.58029	0.438602	0.00798634	0.472845
GOTERM_BP_FAT	GO:0048870~cell motility	13	7.69231	0.000273966	PLAT, NRTN, MMP14, CXCL12, VCAM1, GPX1, SMO, HIF1A, ADAM17, NKX2-1, SELE, SELPLG, LRP5	160	307	13528	3.58029	0.438602	0.00798634	0.472845
GOTERM_BP_FAT	GO:0032102~negative regulation of response to external stimulus	6	3.5503	0.000291204	LEP, GPX1, TNFRSF1B, SLC6A3, PPARG, ADA	160	50	13528	10.146	0.458632	0.00837102	0.502526
GOTERM_BP_FAT	GO:0030888~regulation of B cell proliferation	5	2.95858	0.000301939	IL7, TICAM1, IL13, TCF3, ADA	160	28	13528	15.0982	0.470743	0.00856153	0.521005
GOTERM_BP_FAT	GO:0050864~regulation of B cell activation	6	3.5503	0.000319824	STAT6, IL7, TICAM1, IL13, TCF3, ADA	160	51	13528	9.94706	0.490322	0.00894609	0.551786
GOTERM_BP_FAT	GO:0048878~chemical homeostasis	17	10.0592	0.000348079	DERL1, EPAS1, NTF3, CCKBR, IL6ST, PPARG, SNCA, SLC7A8, CXCL12, GHRHR, PTPN11, SLC4A11, HIF1A, NEUROD1, PTCH1, ASNA1, KCNQ1	160	512	13528	2.80732	0.519789	0.00960529	0.600397
GOTERM_BP_FAT	GO:0019216~regulation of lipid metabolic process	8	4.73373	0.00035024	LEP, BBS4, SNCA, CD81, PPARG, NFKB1, NR3C1, NR5A1	160	112	13528	6.03929	0.521971	0.00953972	0.604113
GOTERM_BP_FAT	GO:0016485~protein processing	8	4.73373	0.00035024	CR2, C3, CLU, PTCH1, MMP14, PARP1, FURIN, CAPN1	160	112	13528	6.03929	0.521971	0.00953972	0.604113
GOTERM_BP_FAT	GO:0007243~protein kinase cascade	14	8.28402	0.000427033	NRTN, TBK1, IL6ST, LY96, TLR4, MAPKAPK2, PTPN11, SS18, AGTR2, ERCC6, CD81, TICAM1, SHC1, IKBKB	160	370	13528	3.19919	0.59341	0.0114715	0.736109
GOTERM_BP_FAT	GO:0006954~inflammatory response	13	7.69231	0.000458414	CR2, CEBPB, C3, LY96, CLU, IL13, NFKB1, TLR4, TNFRSF1B, HIF1A, TICAM1, ITCH, SELE	160	325	13528	3.382	0.619436	0.0121546	0.790002
GOTERM_BP_FAT	GO:0009617~response to bacterium	10	5.91716	0.000459188	GPX1, PPBP, LY96, TICAM1, SNCA, ADAM17, NKX2-1, TLR4, SELE, VLDLR	160	193	13528	4.38083	0.620056	0.0120238	0.79133
GOTERM_BP_FAT	GO:0045321~leukocyte activation	11	6.50888	0.000579279	VCAM1, IL7, TICAM1, SNCA, KLRK1, ADAM17, TLR4, IL7R, TCF3, CXCL12, ADA	160	242	13528	3.84318	0.705034	0.0149597	0.997311
GOTERM_BP_FAT	GO:0001775~cell activation	12	7.10059	0.000581391	VCAM1, IL7, TICAM1, SNCA, COL3A1, KLRK1, ADAM17, TLR4, IL7R, TCF3, CXCL12, ADA	160	287	13528	3.53519	0.706345	0.0148322	1.00093
GOTERM_BP_FAT	GO:0051604~protein maturation	8	4.73373	0.00058733	CR2, C3, CLU, PTCH1, MMP14, PARP1, FURIN, CAPN1	160	122	13528	5.54426	0.709998	0.0148034	1.01111
GOTERM_BP_FAT	GO:0051174~regulation of phosphorus metabolic process	16	9.46746	0.000595802	DLC1, ADCY2, IL6ST, YWHAB, TLR4, LATS1, PTPN11, CCND1, AGTR2, ERCC6, KRAS, CD81, ADAM17, SHC1, GADD45A, VLDLR	160	485	13528	2.78928	0.715132	0.014838	1.02562
GOTERM_BP_FAT	GO:0051276~chromosome organization	16	9.46746	0.000595802	ING5, BRD1, CREBBP, HIRA, NR3C1, LATS1, MAD2L1, RTF1, SMARCA5, PAF1, PARP1, SMARCA2, BAZ2A, ASF1A, CHD4, KDM4D	160	485	13528	2.78928	0.715132	0.014838	1.02562
GOTERM_BP_FAT	GO:0019220~regulation of phosphate metabolic process	16	9.46746	0.000595802	DLC1, ADCY2, IL6ST, YWHAB, TLR4, LATS1, PTPN11, CCND1, AGTR2, ERCC6, KRAS, CD81, ADAM17, SHC1, GADD45A, VLDLR	160	485	13528	2.78928	0.715132	0.014838	1.02562
GOTERM_BP_FAT	GO:0008283~cell proliferation	15	8.87574	0.000630988	FGF6, LMO1, CCKBR, CREBBP, ARTN, MMP14, IL7R, FURIN, CXCL12, GCG, GPX1, INSIG1, CD81, PTCH1, PDZK1	160	436	13528	2.90883	0.735499	0.0155242	1.08588
GOTERM_BP_FAT	GO:0043523~regulation of neuron apoptosis	7	4.14201	0.000662133	GPX1, KRAS, NTF3, SNCA, ESR1, NR3C1, FURIN	160	90	13528	6.57611	0.75231	0.0160967	1.13919
GOTERM_BP_FAT	GO:0001819~positive regulation of cytokine production	7	4.14201	0.000662133	HIF1A, IL6ST, TICAM1, KLRK1, ADAM17, TLR4, ARNT	160	90	13528	6.57611	0.75231	0.0160967	1.13919
GOTERM_BP_FAT	GO:0001890~placenta development	6	3.5503	0.000683096	HIF1A, CEBPB, EPAS1, PPARG, ADA, ARNT	160	60	13528	8.455	0.763019	0.016413	1.17505
GOTERM_BP_FAT	GO:0007267~cell-cell signaling	18	10.6509	0.000694746	PLAT, FGF6, GNRH1, NTF3, IL7, SNCA, IL13, VIPR1, GABARAP, GHRHR, LEP, SMO, TNFRSF11A, NEUROD1, NKX2-1, MERTK, NR5A1, FGF4	160	600	13528	2.5365	0.768769	0.0165025	1.19498
GOTERM_BP_FAT	GO:0051241~negative regulation of multicellular organismal process	9	5.32544	0.000707092	BBS2, AGTR2, PPARG, ADAM17, NFKB1, PTCH1, FURIN, ADA, ANXA2	160	164	13528	4.63994	0.774711	0.0166063	1.21609
GOTERM_BP_FAT	GO:0007166~cell surface receptor linked signal transduction	38	22.4852	0.000731427	FGF6, FGFR2, NRTN, ADCY2, IL6ST, C3, COL3A1, KLRK1, GAST, VIPR1, IL7R, CXCL12, GHRHR, TNFRSF1B, AGTR2, ITGAX, TICAM1, SHC1, FGF4, PLAT, DVL3, CCKBR, LY96, TLE1, FZD6, PTPN11, GRP, GCG, SMO, SS18, CCND1, PPBP, ITGA8, COL1A2, ADAM17, PTCH1, MERTK, LRP5	160	1856	13528	1.73109	0.785979	0.0169839	1.2577
GOTERM_BP_FAT	GO:0040014~regulation of multicellular organism growth	6	3.5503	0.000737114	LEP, BBS2, SLC6A3, PTCH1, GHRHR, PTPN11	160	61	13528	8.31639	0.78853	0.0169284	1.26742
GOTERM_BP_FAT	GO:0006916~anti-apoptosis	10	5.91716	0.0007412	GPX1, CEBPB, GNRH1, IL7, SNCA, CLU, ESR1, ADAM17, NFKB1, IKBKB	160	206	13528	4.10437	0.790344	0.016838	1.2744
GOTERM_BP_FAT	GO:0008203~cholesterol metabolic process	7	4.14201	0.000743885	LEP, MVD, CYP51A1, INSIG1, CAT, IDI1, VLDLR	160	92	13528	6.43315	0.791528	0.0167183	1.27899
GOTERM_BP_FAT	GO:0043619~regulation of transcription from RNA polymerase II promoter in response to oxidative stress	3	1.77515	0.00081101	HIF1A, EPAS1, ARNT	160	4	13528	63.4125	0.819042	0.0180217	1.39364
GOTERM_BP_FAT	GO:0030334~regulation of cell migration	9	5.32544	0.000861894	DLC1, MUC2, AGTR2, HIF1A, IL6ST, ADAM17, FURIN, CXCL12, ADA	160	169	13528	4.50266	0.837454	0.0189424	1.48046
GOTERM_BP_FAT	GO:0048514~blood vessel morphogenesis	10	5.91716	0.000871502	PLAT, FGF6, SMO, GPX1, AGTR2, HIF1A, EPAS1, MMP14, CXCL12, ANXA2	160	211	13528	4.00711	0.840714	0.0189541	1.49685
GOTERM_BP_FAT	GO:0001667~ameboidal cell migration	5	2.95858	0.000897164	SMO, NRTN, HIF1A, CXCL12, LRP5	160	37	13528	11.4257	0.849105	0.0193078	1.5406
GOTERM_BP_FAT	GO:0006952~defense response	18	10.6509	0.000913342	CR2, CEBPB, TBK1, C3, LY96, CLU, PPARG, SNCA, IL13, NFKB1, TLR4, TMEM173, TNFRSF1B, HIF1A, PPBP, TICAM1, ITCH, SELE	160	615	13528	2.47463	0.854167	0.0194541	1.56818
GOTERM_BP_FAT	GO:0042493~response to drug	10	5.91716	0.00102744	SS18, CCND1, SLC6A3, SNCA, PPARG, ADAM17, NEUROD1, PTCH1, IKBKB, PDZK1	160	216	13528	3.91435	0.885357	0.0216405	1.76245
GOTERM_BP_FAT	GO:0046883~regulation of hormone secretion	6	3.5503	0.00105642	LEP, GCG, NEUROD1, KCNQ1, GHRHR, PTPN11	160	66	13528	7.68636	0.892155	0.0220245	1.81174
GOTERM_BP_FAT	GO:0042698~ovulation cycle	6	3.5503	0.00113094	LEP, GNRH1, NKX2-1, MMP14, NR5A1, NRIP1	160	67	13528	7.57164	0.90784	0.0233298	1.93835
GOTERM_BP_FAT	GO:0043085~positive regulation of catalytic activity	16	9.46746	0.00120731	DLC1, ADCY2, CCKBR, YWHAB, GHRHR, PTPN11, CCND1, AGTR2, ERCC6, HIF1A, KRAS, CD81, ADAM17, SHC1, SELE, VLDLR	160	520	13528	2.60154	0.921554	0.0246456	2.06797
GOTERM_BP_FAT	GO:0051341~regulation of oxidoreductase activity	5	2.95858	0.001208	AGTR2, HIF1A, KRAS, SNCA, NFKB1	160	40	13528	10.5687	0.921668	0.024423	2.06914
GOTERM_BP_FAT	GO:0050796~regulation of insulin secretion	5	2.95858	0.001208	LEP, GCG, NEUROD1, KCNQ1, PTPN11	160	40	13528	10.5687	0.921668	0.024423	2.06914
GOTERM_BP_FAT	GO:0016125~sterol metabolic process	7	4.14201	0.00121262	LEP, MVD, CYP51A1, INSIG1, CAT, IDI1, VLDLR	160	101	13528	5.8599	0.922428	0.0242825	2.07697
GOTERM_BP_FAT	GO:0045087~innate immune response	8	4.73373	0.00121549	TMEM173, CR2, C3, TBK1, SNCA, CLU, PPARG, TLR4	160	138	13528	4.90145	0.922896	0.0241102	2.08184
GOTERM_BP_FAT	GO:0045165~cell fate commitment	8	4.73373	0.00126755	MYOD1, SMO, NTF3, IL7, PPARG, NKX2-1, NEUROD1, TCF3	160	139	13528	4.86619	0.930915	0.0248963	2.17008
GOTERM_BP_FAT	GO:0007610~behavior	15	8.87574	0.00127482	BBS4, CCKBR, SLC6A3, SNCA, CXCL12, ADA, LEP, GCG, BBS2, AGTR2, KRAS, PPBP, ITGA8, NKX2-1, VLDLR	160	469	13528	2.70416	0.931966	0.0248063	2.1824
GOTERM_BP_FAT	GO:0051092~positive regulation of NF-kappaB transcription factor activity	5	2.95858	0.00132648	KRAS, TICAM1, TLR4, CAT, IKBKB	160	41	13528	10.311	0.938991	0.0255633	2.26988
GOTERM_BP_FAT	GO:0043618~regulation of transcription from RNA polymerase II promoter in response to stress	3	1.77515	0.00134124	HIF1A, EPAS1, ARNT	160	5	13528	50.73	0.940863	0.0256103	2.29487
GOTERM_BP_FAT	GO:0043620~regulation of transcription in response to stress	3	1.77515	0.00134124	HIF1A, EPAS1, ARNT	160	5	13528	50.73	0.940863	0.0256103	2.29487
GOTERM_BP_FAT	GO:0045637~regulation of myeloid cell differentiation	6	3.5503	0.0013779	LEP, BGLAP, HIF1A, SPI1, TLR4, ARNT	160	70	13528	7.24714	0.945264	0.0260655	2.35689
GOTERM_BP_FAT	GO:0006928~cell motion	15	8.87574	0.00143723	PLAT, NRTN, NTF3, IL13, MMP14, CXCL12, VCAM1, GPX1, SMO, HIF1A, NKX2-1, ADAM17, SELE, SELPLG, LRP5	160	475	13528	2.67	0.951704	0.0269317	2.45719
GOTERM_BP_FAT	GO:0060249~anatomical structure homeostasis	7	4.14201	0.00155581	BBS4, MUC2, HIF1A, EPAS1, IL7, PARP1, FH	160	106	13528	5.58349	0.962396	0.0288667	2.65737
GOTERM_BP_FAT	GO:0050778~positive regulation of immune response	8	4.73373	0.00161854	CR2, C3, IL6ST, TICAM1, CLU, KLRK1, TLR4, ADA	160	145	13528	4.66483	0.967059	0.0297522	2.7631
GOTERM_BP_FAT	GO:0006325~chromatin organization	13	7.69231	0.00169748	ING5, BRD1, CREBBP, HIRA, NR3C1, RTF1, SMARCA5, PAF1, SMARCA2, BAZ2A, ASF1A, CHD4, KDM4D	160	378	13528	2.9078	0.972114	0.0309123	2.896
GOTERM_BP_FAT	GO:0043009~chordate embryonic development	12	7.10059	0.00184401	DLC1, BBS4, SMO, HIF1A, CEBPB, PLCG1, EPAS1, ELL, PTCH1, ADA, ARNT, FZD6	160	331	13528	3.06526	0.979532	0.0332513	3.14225
GOTERM_BP_FAT	GO:0048584~positive regulation of response to stimulus	10	5.91716	0.00189711	CR2, C3, IL6ST, TICAM1, CLU, KLRK1, ADAM17, TLR4, CXCL12, ADA	160	236	13528	3.58263	0.981703	0.0339033	3.23134
GOTERM_BP_FAT	GO:0009792~embryonic development ending in birth or egg hatching	12	7.10059	0.00197921	DLC1, BBS4, SMO, HIF1A, CEBPB, PLCG1, EPAS1, ELL, PTCH1, ADA, ARNT, FZD6	160	334	13528	3.03772	0.984614	0.035049	3.36894
GOTERM_BP_FAT	GO:0050870~positive regulation of T cell activation	6	3.5503	0.00198815	VCAM1, IL7, IL6ST, KLRK1, IL7R, ADA	160	76	13528	6.675	0.984902	0.0349116	3.38391
GOTERM_BP_FAT	GO:0050901~leukocyte tethering or rolling	3	1.77515	0.00199634	VCAM1, SELE, SELPLG	160	6	13528	42.275	0.985161	0.0347636	3.39762
GOTERM_BP_FAT	GO:0051302~regulation of cell division	5	2.95858	0.00221234	FGF6, BBS4, PPBP, CAT, FGF4	160	47	13528	8.99468	0.990595	0.0381415	3.75864
GOTERM_BP_FAT	GO:0007167~enzyme linked receptor protein signaling pathway	12	7.10059	0.00237969	PLAT, FGF6, FGFR2, SS18, NRTN, IL6ST, COL3A1, COL1A2, ADAM17, SHC1, FGF4, PTPN11	160	342	13528	2.96667	0.993395	0.0406387	4.03749
GOTERM_BP_FAT	GO:0031399~regulation of protein modification process	11	6.50888	0.00256047	DLC1, CCND1, ERCC6, MAD2L1, IL6ST, SNCA, CD81, YWHAB, ADAM17, TLR4, VPS28	160	295	13528	3.15271	0.995492	0.0433114	4.33785
GOTERM_BP_FAT	GO:0050863~regulation of T cell activation	7	4.14201	0.00256719	VCAM1, IL7, IL6ST, KLRK1, ITCH, IL7R, ADA	160	117	13528	5.05855	0.995555	0.0430774	4.34899
GOTERM_BP_FAT	GO:0033500~carbohydrate homeostasis	5	2.95858	0.00258073	HIF1A, PPARG, NEUROD1, PTCH1, PTPN11	160	49	13528	8.62755	0.995681	0.0429582	4.37144
GOTERM_BP_FAT	GO:0042593~glucose homeostasis	5	2.95858	0.00258073	HIF1A, PPARG, NEUROD1, PTCH1, PTPN11	160	49	13528	8.62755	0.995681	0.0429582	4.37144
GOTERM_BP_FAT	GO:0051046~regulation of secretion	9	5.32544	0.00266954	LEP, GCG, SNCA, IL13, NEUROD1, KCNQ1, GHRHR, ADA, PTPN11	160	202	13528	3.76708	0.996419	0.0440579	4.51863
GOTERM_BP_FAT	GO:0008202~steroid metabolic process	9	5.32544	0.00266954	LEP, CYP3A4, MVD, CYP51A1, INSIG1, NR3C1, CAT, IDI1, VLDLR	160	202	13528	3.76708	0.996419	0.0440579	4.51863
GOTERM_BP_FAT	GO:0001892~embryonic placenta development	4	2.36686	0.00268995	HIF1A, CEBPB, EPAS1, ARNT	160	24	13528	14.0917	0.996571	0.0440431	4.55242
GOTERM_BP_FAT	GO:0006638~neutral lipid metabolic process	5	2.95858	0.00277982	GPX1, IL6ST, SNCA, CAT, PTPN11	160	50	13528	8.455	0.997164	0.0451327	4.70109
GOTERM_BP_FAT	GO:0002683~negative regulation of immune system process	6	3.5503	0.00292615	STAT6, GPX1, COL3A1, ITCH, IL7R, ADA	160	83	13528	6.11205	0.997918	0.0470928	4.94269
GOTERM_BP_FAT	GO:0050810~regulation of steroid biosynthetic process	4	2.36686	0.00303061	LEP, NFKB1, NR3C1, NR5A1	160	25	13528	13.528	0.99833	0.0483664	5.11482
GOTERM_BP_FAT	GO:0050777~negative regulation of immune response	4	2.36686	0.00303061	STAT6, GPX1, COL3A1, IL7R	160	25	13528	13.528	0.99833	0.0483664	5.11482
GOTERM_BP_FAT	GO:0048871~multicellular organismal homeostasis	6	3.5503	0.00324451	BBS4, MUC2, GPX1, EPAS1, IL7, FH	160	85	13528	5.96824	0.998938	0.0513083	5.46633
GOTERM_BP_FAT	GO:0044057~regulation of system process	11	6.50888	0.00356671	PLAT, LEP, AGTR2, KRAS, EPAS1, NTF3, IL6ST, SNCA, KCNQ1, ADA, PTPN11	160	309	13528	3.00987	0.999462	0.0558492	5.99354
GOTERM_BP_FAT	GO:0043193~positive regulation of gene-specific transcription	6	3.5503	0.0035871	HIF1A, PPARG, SPI1, TCF3, SMARCA2, ARNT	160	87	13528	5.83103	0.999485	0.0557465	6.0268
GOTERM_BP_FAT	GO:0046885~regulation of hormone biosynthetic process	3	1.77515	0.00366929	HIF1A, NR3C1, ARNT	160	8	13528	31.7062	0.999567	0.0565729	6.16079
GOTERM_BP_FAT	GO:0010575~positive regulation vascular endothelial growth factor production	3	1.77515	0.00366929	HIF1A, IL6ST, ARNT	160	8	13528	31.7062	0.999567	0.0565729	6.16079
GOTERM_BP_FAT	GO:0048511~rhythmic process	7	4.14201	0.00400757	LEP, GNRH1, NKX2-1, MMP14, ADA, NR5A1, NRIP1	160	128	13528	4.62383	0.999788	0.061189	6.71039
GOTERM_BP_FAT	GO:0048771~tissue remodeling	5	2.95858	0.00419888	AGTR2, HIF1A, EPAS1, IL7, MMP14	160	56	13528	7.54911	0.999859	0.0635616	7.01987
GOTERM_BP_FAT	GO:0002819~regulation of adaptive immune response	5	2.95858	0.00419888	STAT6, C3, IL6ST, IL7R, ADA	160	56	13528	7.54911	0.999859	0.0635616	7.01987
GOTERM_BP_FAT	GO:0048568~embryonic organ development	8	4.73373	0.00421132	HIF1A, CEBPB, EPAS1, ITGA8, NEUROD1, ADA, ARNT, FZD6	160	172	13528	3.93256	0.999863	0.0632907	7.03997
GOTERM_BP_FAT	GO:0035295~tube development	9	5.32544	0.00448094	DLC1, BBS4, EPAS1, NKX2-1, PTCH1, MMP14, CXCL12, ADA, FZD6	160	220	13528	3.45886	0.999922	0.0667384	7.47439
GOTERM_BP_FAT	GO:0002521~leukocyte differentiation	7	4.14201	0.0044876	VCAM1, IL7, PPARG, ADAM17, IL7R, TCF3, ADA	160	131	13528	4.51794	0.999923	0.0663666	7.4851
GOTERM_BP_FAT	GO:0051338~regulation of transferase activity	12	7.10059	0.00450569	CCND1, ERCC6, ADCY2, KRAS, CD81, PPARG, ADAM17, SHC1, GADD45A, LATS1, VLDLR, PTPN11	160	372	13528	2.72742	0.999926	0.0661625	7.51417
GOTERM_BP_FAT	GO:0010574~regulation of vascular endothelial growth factor production	3	1.77515	0.00468135	HIF1A, IL6ST, ARNT	160	9	13528	28.1833	0.999949	0.0681839	7.79606
GOTERM_BP_FAT	GO:0051000~positive regulation of nitric-oxide synthase activity	3	1.77515	0.00468135	AGTR2, HIF1A, KRAS	160	9	13528	28.1833	0.999949	0.0681839	7.79606
GOTERM_BP_FAT	GO:0045860~positive regulation of protein kinase activity	9	5.32544	0.00485772	CCND1, ERCC6, ADCY2, KRAS, CD81, ADAM17, SHC1, VLDLR, PTPN11	160	223	13528	3.41233	0.999965	0.0701826	8.07827
GOTERM_BP_FAT	GO:0007169~transmembrane receptor protein tyrosine kinase signaling pathway	9	5.32544	0.00498857	PLAT, FGF6, FGFR2, SS18, NRTN, ADAM17, SHC1, FGF4, PTPN11	160	224	13528	3.3971	0.999973	0.0715194	8.28712
GOTERM_BP_FAT	GO:0002253~activation of immune response	6	3.5503	0.0049915	CR2, C3, TICAM1, CLU, KLRK1, TLR4	160	94	13528	5.39681	0.999974	0.0710778	8.29179
GOTERM_BP_FAT	GO:0032583~regulation of gene-specific transcription	7	4.14201	0.00500881	HIF1A, PPARG, SPI1, NFKB1, TCF3, SMARCA2, ARNT	160	134	13528	4.41679	0.999975	0.0708385	8.31938
GOTERM_BP_FAT	GO:0060606~tube closure	4	2.36686	0.00512515	DLC1, BBS4, PTCH1, FZD6	160	30	13528	11.2733	0.99998	0.0719459	8.50464
GOTERM_BP_FAT	GO:0001843~neural tube closure	4	2.36686	0.00512515	DLC1, BBS4, PTCH1, FZD6	160	30	13528	11.2733	0.99998	0.0719459	8.50464
GOTERM_BP_FAT	GO:0051091~positive regulation of transcription factor activity	5	2.95858	0.00537671	KRAS, TICAM1, TLR4, CAT, IKBKB	160	60	13528	7.04583	0.999988	0.0748537	8.904
GOTERM_BP_FAT	GO:0050728~negative regulation of inflammatory response	4	2.36686	0.0056259	GPX1, TNFRSF1B, PPARG, ADA	160	31	13528	10.9097	0.999993	0.0776824	9.29799
GOTERM_BP_FAT	GO:0045123~cellular extravasation	3	1.77515	0.0058067	VCAM1, SELE, SELPLG	160	10	13528	25.365	0.999995	0.0795641	9.58284
GOTERM_BP_FAT	GO:0045449~regulation of transcription	45	26.6272	0.00587686	ING5, MYOD1, ELL, PPARG, SPI1, HIRA, TLR4, NFKB1, NR3C1, ZNF174, ARNT, STAT6, ERCC6, KRAS, SNF8, RTF1, TICAM1, NKX2-1, CAT, BAZ2A, VPS36, ASF1A, TCF3, CHD4, PITX2, DVL3, BGLAP, CEBPB, EPAS1, NTF3, CREBBP, YWHAB, ESR1, TLE1, NRIP1, SS18, HIF1A, UBTF, SMARCA5, NEUROD1, PAF1, IKBKB, SMARCA2, KDM4D, NR5A1	160	2601	13528	1.4628	0.999996	0.0799705	9.69315
GOTERM_BP_FAT	GO:0033674~positive regulation of kinase activity	9	5.32544	0.00598181	CCND1, ERCC6, ADCY2, KRAS, CD81, ADAM17, SHC1, VLDLR, PTPN11	160	231	13528	3.29416	0.999997	0.0808232	9.85791
GOTERM_BP_FAT	GO:0022602~ovulation cycle process	5	2.95858	0.00604078	LEP, NKX2-1, MMP14, NR5A1, NRIP1	160	62	13528	6.81855	0.999997	0.0810711	9.95037
GOTERM_BP_FAT	GO:0044092~negative regulation of molecular function	11	6.50888	0.00612538	SMO, GPX1, ADCY2, MAD2L1, IL7, SNCA, PPARG, NFKB1, CAT, GADD45A, LATS1	160	334	13528	2.78458	0.999998	0.081644	10.0829
GOTERM_BP_FAT	GO:0007249~I-kappaB kinase/NF-kappaB cascade	5	2.95858	0.00639238	TBK1, LY96, TICAM1, TLR4, IKBKB	160	63	13528	6.71032	0.999999	0.0845263	10.4998
GOTERM_BP_FAT	GO:0001894~tissue homeostasis	5	2.95858	0.00639238	BBS4, MUC2, EPAS1, IL7, FH	160	63	13528	6.71032	0.999999	0.0845263	10.4998
GOTERM_BP_FAT	GO:0051271~negative regulation of cell motion	5	2.95858	0.00639238	DLC1, MUC2, AGTR2, ACTN1, ADA	160	63	13528	6.71032	0.999999	0.0845263	10.4998
GOTERM_BP_FAT	GO:0051252~regulation of RNA metabolic process	34	20.1183	0.00640292	MYOD1, PPARG, HIRA, SPI1, NFKB1, MAPKAPK2, NR3C1, ZNF174, ARNT, STAT6, TNFRSF1B, ERCC6, SNF8, NKX2-1, BAZ2A, ASF1A, TCF3, CHD4, PITX2, DVL3, CEBPB, EPAS1, NTF3, CREBBP, ESR1, TLE1, NRIP1, SS18, HIF1A, UBTF, SMARCA5, NEUROD1, SMARCA2, NR5A1	160	1813	13528	1.5856	0.999999	0.084134	10.5162
GOTERM_BP_FAT	GO:0045937~positive regulation of phosphate metabolic process	6	3.5503	0.00647371	DLC1, CCND1, IL6ST, CD81, ADAM17, TLR4	160	100	13528	5.073	0.999999	0.0845017	10.6264
GOTERM_BP_FAT	GO:0032868~response to insulin stimulus	6	3.5503	0.00647371	LEP, PPARG, SHC1, PARP1, GHRHR, VLDLR	160	100	13528	5.073	0.999999	0.0845017	10.6264
GOTERM_BP_FAT	GO:0010562~positive regulation of phosphorus metabolic process	6	3.5503	0.00647371	DLC1, CCND1, IL6ST, CD81, ADAM17, TLR4	160	100	13528	5.073	0.999999	0.0845017	10.6264
GOTERM_BP_FAT	GO:0014020~primary neural tube formation	4	2.36686	0.00671285	DLC1, BBS4, PTCH1, FZD6	160	33	13528	10.2485	0.999999	0.0869569	10.9978
GOTERM_BP_FAT	GO:0032103~positive regulation of response to external stimulus	5	2.95858	0.00675731	C3, IL6ST, ADAM17, TLR4, CXCL12	160	64	13528	6.60547	0.999999	0.0869764	11.0667
GOTERM_BP_FAT	GO:0045471~response to ethanol	5	2.95858	0.00675731	CCND1, GNRH1, SLC6A3, NKX2-1, TLR4	160	64	13528	6.60547	0.999999	0.0869764	11.0667
GOTERM_BP_FAT	GO:0033554~cellular response to stress	15	8.87574	0.00689354	DERL1, EPAS1, SNCA, ARNT, PTPN11, GPX1, SMO, CCND1, ERCC6, HIF1A, INSIG1, CAT, PARP1, GADD45A, ASF1A	160	566	13528	2.24072	1	0.0881198	11.2775
GOTERM_BP_FAT	GO:0032989~cellular component morphogenesis	12	7.10059	0.00724928	BBS4, SS18, SMO, BBS2, HIF1A, NTF3, CLU, NKX2-1, MYOZ1, IL7R, CXCL12, PTPN11	160	397	13528	2.55567	1	0.0919123	11.8256
GOTERM_BP_FAT	GO:0030098~lymphocyte differentiation	6	3.5503	0.00731995	VCAM1, IL7, ADAM17, IL7R, TCF3, ADA	160	103	13528	4.92524	1	0.0922163	11.9341
GOTERM_BP_FAT	GO:0051347~positive regulation of transferase activity	9	5.32544	0.00747221	CCND1, ERCC6, ADCY2, KRAS, CD81, ADAM17, SHC1, VLDLR, PTPN11	160	240	13528	3.17062	1	0.0934922	12.1675
GOTERM_BP_FAT	GO:0048545~response to steroid hormone stimulus	8	4.73373	0.00760267	CCND1, KRAS, GNRH1, PPARG, ESR1, PTCH1, MMP14, GHRHR	160	192	13528	3.52292	1	0.0944923	12.367
GOTERM_BP_FAT	GO:0045859~regulation of protein kinase activity	11	6.50888	0.00762743	CCND1, ERCC6, ADCY2, KRAS, CD81, ADAM17, SHC1, GADD45A, LATS1, VLDLR, PTPN11	160	345	13528	2.6958	1	0.0942328	12.4048
GOTERM_BP_FAT	GO:0000226~microtubule cytoskeleton organization	7	4.14201	0.00779801	BBS4, SS18, BBS2, CKAP5, PPP4C, GADD45A, GABARAP	160	147	13528	4.02619	1	0.0956855	12.6649
GOTERM_BP_FAT	GO:0010906~regulation of glucose metabolic process	4	2.36686	0.00791628	LEP, HIF1A, NR3C1, ARNT	160	35	13528	9.66286	1	0.0965105	12.8448
GOTERM_BP_FAT	GO:0043627~response to estrogen stimulus	6	3.5503	0.00792522	CCND1, PPARG, ESR1, PTCH1, MMP14, GHRHR	160	105	13528	4.83143	1	0.0960614	12.8584
GOTERM_BP_FAT	GO:0001525~angiogenesis	7	4.14201	0.00806233	FGF6, GPX1, HIF1A, EPAS1, MMP14, CXCL12, ANXA2	160	148	13528	3.99899	1	0.0970904	13.0664
GOTERM_BP_FAT	GO:0007155~cell adhesion	17	10.0592	0.00826029	DLC1, FGF6, BGLAP, SELL, COL3A1, ACTN1, FBLIM1, CTNNA1, CXCL12, VCAM1, ITGAX, ITGA8, SIGLEC7, ADAM17, SELPLG, SELE, FGF4	160	700	13528	2.05336	1	0.0987999	13.3661
GOTERM_BP_FAT	GO:0032869~cellular response to insulin stimulus	5	2.95858	0.00835447	PPARG, SHC1, PARP1, GHRHR, VLDLR	160	68	13528	6.21691	1	0.0993122	13.5083
GOTERM_BP_FAT	GO:0021915~neural tube development	5	2.95858	0.00835447	DLC1, BBS4, SMO, PTCH1, FZD6	160	68	13528	6.21691	1	0.0993122	13.5083
GOTERM_BP_FAT	GO:0022610~biological adhesion	17	10.0592	0.00836826	DLC1, FGF6, BGLAP, SELL, COL3A1, ACTN1, FBLIM1, CTNNA1, CXCL12, VCAM1, ITGAX, ITGA8, SIGLEC7, ADAM17, SELPLG, SELE, FGF4	160	701	13528	2.05043	1	0.0989131	13.5291
GOTERM_BP_FAT	GO:0032350~regulation of hormone metabolic process	3	1.77515	0.00838623	HIF1A, NR3C1, ARNT	160	12	13528	21.1375	1	0.0985654	13.5562
GOTERM_BP_FAT	GO:0010039~response to iron ion	3	1.77515	0.00838623	CCND1, SLC6A3, SNCA	160	12	13528	21.1375	1	0.0985654	13.5562
GOTERM_BP_FAT	GO:0031348~negative regulation of defense response	4	2.36686	0.00856253	GPX1, TNFRSF1B, PPARG, ADA	160	36	13528	9.39444	1	0.099984	13.8216
GOTERM_BP_FAT	GO:0019218~regulation of steroid metabolic process	4	2.36686	0.00856253	LEP, NFKB1, NR3C1, NR5A1	160	36	13528	9.39444	1	0.099984	13.8216
GOTERM_BP_FAT	GO:0046660~female sex differentiation	5	2.95858	0.00878911	LEP, NKX2-1, MMP14, NR5A1, NRIP1	160	69	13528	6.12681	1	0.101939	14.1617
GOTERM_BP_FAT	GO:0046545~development of primary female sexual characteristics	5	2.95858	0.00878911	LEP, NKX2-1, MMP14, NR5A1, NRIP1	160	69	13528	6.12681	1	0.101939	14.1617
GOTERM_BP_FAT	GO:0042325~regulation of phosphorylation	13	7.69231	0.00895453	ADCY2, IL6ST, TLR4, LATS1, PTPN11, CCND1, KRAS, ERCC6, CD81, ADAM17, SHC1, GADD45A, VLDLR	160	466	13528	2.35869	1	0.103198	14.4091
GOTERM_BP_FAT	GO:0060341~regulation of cellular localization	9	5.32544	0.00901838	LEP, GCG, SMO, SNCA, IL13, NEUROD1, KCNQ1, GHRHR, PTPN11	160	248	13528	3.06835	1	0.103336	14.5045
GOTERM_BP_FAT	GO:0046649~lymphocyte activation	8	4.73373	0.00914089	VCAM1, IL7, KLRK1, ADAM17, IL7R, TCF3, CXCL12, ADA	160	199	13528	3.39899	1	0.104107	14.6871
GOTERM_BP_FAT	GO:0010627~regulation of protein kinase cascade	9	5.32544	0.00922729	LEP, GPX1, ERCC6, TBK1, IL6ST, TICAM1, TLR4, CAT, IKBKB	160	249	13528	3.05602	1	0.10448	14.8157
GOTERM_BP_FAT	GO:0043388~positive regulation of DNA binding	5	2.95858	0.00923828	KRAS, TICAM1, TLR4, CAT, IKBKB	160	70	13528	6.03929	1	0.104043	14.832
GOTERM_BP_FAT	GO:0000902~cell morphogenesis	11	6.50888	0.00940008	BBS4, SS18, SMO, BBS2, HIF1A, NTF3, CLU, NKX2-1, IL7R, CXCL12, PTPN11	160	356	13528	2.6125	1	0.105214	15.0723
GOTERM_BP_FAT	GO:0043549~regulation of kinase activity	11	6.50888	0.00957567	CCND1, ERCC6, ADCY2, KRAS, CD81, ADAM17, SHC1, GADD45A, LATS1, VLDLR, PTPN11	160	357	13528	2.60518	1	0.106518	15.3323
GOTERM_BP_FAT	GO:0045926~negative regulation of growth	6	3.5503	0.00958899	ING5, BBS2, AGTR2, IL7, PPARG, PTCH1	160	110	13528	4.61182	1	0.106101	15.352
GOTERM_BP_FAT	GO:0030511~positive regulation of transforming growth factor beta receptor signaling pathway	3	1.77515	0.00983502	ITGA8, ADAM17, FURIN	160	13	13528	19.5115	1	0.108119	15.715
GOTERM_BP_FAT	GO:0032770~positive regulation of monooxygenase activity	3	1.77515	0.00983502	AGTR2, HIF1A, KRAS	160	13	13528	19.5115	1	0.108119	15.715
GOTERM_BP_FAT	GO:0010675~regulation of cellular carbohydrate metabolic process	4	2.36686	0.00994563	LEP, HIF1A, NR3C1, ARNT	160	38	13528	8.9	1	0.108709	15.8777
GOTERM_BP_FAT	GO:0001818~negative regulation of cytokine production	4	2.36686	0.00994563	PPARG, ADAM17, NFKB1, FURIN	160	38	13528	8.9	1	0.108709	15.8777
GOTERM_BP_FAT	GO:0032268~regulation of cellular protein metabolic process	13	7.69231	0.0101641	DLC1, IL6ST, SNCA, YWHAB, NFKB1, TLR4, FURIN, CCND1, MAD2L1, ERCC6, CD81, ADAM17, VPS28	160	474	13528	2.31888	1	0.110402	16.1982
GOTERM_BP_FAT	GO:0008406~gonad development	6	3.5503	0.0103171	LEP, CCND1, NKX2-1, MMP14, NR5A1, NRIP1	160	112	13528	4.52946	1	0.111405	16.422
GOTERM_BP_FAT	GO:0010035~response to inorganic substance	8	4.73373	0.0106683	GPX1, CCND1, ERCC6, SLC6A3, SNCA, CAT, ASNA1, ADA	160	205	13528	3.29951	1	0.114409	16.9337
GOTERM_BP_FAT	GO:0031349~positive regulation of defense response	5	2.95858	0.0106747	C3, IL6ST, TICAM1, KLRK1, TLR4	160	73	13528	5.7911	1	0.113898	16.9429
GOTERM_BP_FAT	GO:0051781~positive regulation of cell division	4	2.36686	0.010683	FGF6, PPBP, CAT, FGF4	160	39	13528	8.67179	1	0.113411	16.9549
GOTERM_BP_FAT	GO:0006109~regulation of carbohydrate metabolic process	4	2.36686	0.010683	LEP, HIF1A, NR3C1, ARNT	160	39	13528	8.67179	1	0.113411	16.9549
GOTERM_BP_FAT	GO:0032844~regulation of homeostatic process	6	3.5503	0.0110822	BGLAP, HIF1A, SPI1, ADAM17, ADA, ARNT	160	114	13528	4.45	1	0.116828	17.5327
GOTERM_BP_FAT	GO:0006350~transcription	37	21.8935	0.0111538	ING5, MYOD1, TAF1C, ELL, PPARG, HIRA, SPI1, NFKB1, NR3C1, ZNF174, ARNT, STAT6, ERCC6, SNF8, RTF1, NKX2-1, BAZ2A, VPS36, ASF1A, TCF3, CHD4, BGLAP, CEBPB, EPAS1, CREBBP, ESR1, TLE1, NRIP1, HIF1A, UBTF, SMARCA5, NEUROD1, PAF1, PARP1, SMARCA2, KDM4D, NR5A1	160	2101	13528	1.48898	1	0.11696	17.636
GOTERM_BP_FAT	GO:0001841~neural tube formation	4	2.36686	0.0114512	DLC1, BBS4, PTCH1, FZD6	160	40	13528	8.455	1	0.119312	18.0634
GOTERM_BP_FAT	GO:0048534~hemopoietic or lymphoid organ development	9	5.32544	0.0117709	VCAM1, TNFRSF11A, EPAS1, IL7, PPARG, ADAM17, IL7R, TCF3, ADA	160	260	13528	2.92673	1	0.121852	18.5205
GOTERM_BP_FAT	GO:0042113~B cell activation	5	2.95858	0.0122482	VCAM1, ADAM17, IL7R, TCF3, ADA	160	76	13528	5.5625	1	0.125883	19.1986
GOTERM_BP_FAT	GO:0003006~reproductive developmental process	9	5.32544	0.012284	LEP, BBS4, BBS2, CCND1, NKX2-1, MMP14, CXCL12, NR5A1, NRIP1	160	262	13528	2.90439	1	0.12562	19.2492
GOTERM_BP_FAT	GO:0002250~adaptive immune response	5	2.95858	0.0128039	CR2, C3, CLU, ADAM17, TLR4	160	77	13528	5.49026	1	0.129982	19.9814
GOTERM_BP_FAT	GO:0002460~adaptive immune response based on somatic recombination of immune receptors built from immunoglobulin superfamily domains	5	2.95858	0.0128039	CR2, C3, CLU, ADAM17, TLR4	160	77	13528	5.49026	1	0.129982	19.9814
GOTERM_BP_FAT	GO:0032642~regulation of chemokine production	3	1.77515	0.0130375	HIF1A, TICAM1, ADAM17	160	15	13528	16.91	1	0.131576	20.3082
GOTERM_BP_FAT	GO:0042116~macrophage activation	3	1.77515	0.0130375	TICAM1, SNCA, TLR4	160	15	13528	16.91	1	0.131576	20.3082
GOTERM_BP_FAT	GO:0051099~positive regulation of binding	5	2.95858	0.0133755	KRAS, TICAM1, TLR4, CAT, IKBKB	160	78	13528	5.41987	1	0.134132	20.779
GOTERM_BP_FAT	GO:0001838~embryonic epithelial tube formation	4	2.36686	0.0139432	DLC1, BBS4, PTCH1, FZD6	160	43	13528	7.86512	1	0.138792	21.5638
GOTERM_BP_FAT	GO:0006641~triglyceride metabolic process	4	2.36686	0.0139432	GPX1, IL6ST, CAT, PTPN11	160	43	13528	7.86512	1	0.138792	21.5638
GOTERM_BP_FAT	GO:0034097~response to cytokine stimulus	5	2.95858	0.0139631	STAT6, IL6ST, SNCA, COL3A1, SELE	160	79	13528	5.35127	1	0.13833	21.5912
GOTERM_BP_FAT	GO:0010740~positive regulation of protein kinase cascade	7	4.14201	0.014031	LEP, GPX1, TBK1, IL6ST, TICAM1, TLR4, CAT	160	167	13528	3.54401	1	0.138313	21.6845
GOTERM_BP_FAT	GO:0042692~muscle cell differentiation	6	3.5503	0.0140639	FGF6, MYOD1, GPX1, KRAS, NTF3, MYOZ1	160	121	13528	4.19256	1	0.137977	21.7297
GOTERM_BP_FAT	GO:0051101~regulation of DNA binding	6	3.5503	0.0140639	SMO, KRAS, TICAM1, TLR4, CAT, IKBKB	160	121	13528	4.19256	1	0.137977	21.7297
GOTERM_BP_FAT	GO:0006355~regulation of transcription, DNA-dependent	32	18.9349	0.0144053	MYOD1, PPARG, HIRA, SPI1, NFKB1, NR3C1, ZNF174, ARNT, STAT6, ERCC6, SNF8, NKX2-1, BAZ2A, ASF1A, TCF3, CHD4, PITX2, DVL3, CEBPB, EPAS1, NTF3, CREBBP, ESR1, TLE1, NRIP1, SS18, HIF1A, UBTF, SMARCA5, NEUROD1, SMARCA2, NR5A1	160	1773	13528	1.526	1	0.140453	22.1972
GOTERM_BP_FAT	GO:0016570~histone modification	6	3.5503	0.0145298	ING5, BRD1, RTF1, CREBBP, PAF1, BAZ2A	160	122	13528	4.1582	1	0.140939	22.367
GOTERM_BP_FAT	GO:0045927~positive regulation of growth	5	2.95858	0.0145669	MYOD1, IL7, SLC6A3, ADAM17, GHRHR	160	80	13528	5.28437	1	0.140633	22.4175
GOTERM_BP_FAT	GO:0050999~regulation of nitric-oxide synthase activity	3	1.77515	0.0147861	AGTR2, HIF1A, KRAS	160	16	13528	15.8531	1	0.141962	22.7155
GOTERM_BP_FAT	GO:0035148~tube lumen formation	4	2.36686	0.0148368	DLC1, BBS4, PTCH1, FZD6	160	44	13528	7.68636	1	0.141776	22.7843
GOTERM_BP_FAT	GO:0046890~regulation of lipid biosynthetic process	4	2.36686	0.0157622	LEP, NFKB1, NR3C1, NR5A1	160	45	13528	7.51556	1	0.149318	24.0294
GOTERM_BP_FAT	GO:0051050~positive regulation of transport	8	4.73373	0.0163117	SMO, C3, SNCA, IL13, SELE, PDZK1, GHRHR, PTPN11	160	223	13528	3.03318	1	0.153459	24.7597
GOTERM_BP_FAT	GO:0002520~immune system development	9	5.32544	0.0163478	VCAM1, TNFRSF11A, EPAS1, IL7, PPARG, ADAM17, IL7R, TCF3, ADA	160	276	13528	2.75707	1	0.153098	24.8075
GOTERM_BP_FAT	GO:0048608~reproductive structure development	6	3.5503	0.0164967	LEP, CCND1, NKX2-1, MMP14, NR5A1, NRIP1	160	126	13528	4.02619	1	0.153713	25.0041
GOTERM_BP_FAT	GO:0016569~covalent chromatin modification	6	3.5503	0.0164967	ING5, BRD1, RTF1, CREBBP, PAF1, BAZ2A	160	126	13528	4.02619	1	0.153713	25.0041
GOTERM_BP_FAT	GO:0043043~peptide biosynthetic process	3	1.77515	0.0166296	HAGH, GGT7, FURIN	160	17	13528	14.9206	1	0.154186	25.1792
GOTERM_BP_FAT	GO:0043086~negative regulation of catalytic activity	9	5.32544	0.0166712	GPX1, ADCY2, MAD2L1, IL7, SNCA, PPARG, NFKB1, GADD45A, LATS1	160	277	13528	2.74711	1	0.153874	25.234
GOTERM_BP_FAT	GO:0035239~tube morphogenesis	6	3.5503	0.0170147	DLC1, BBS4, PTCH1, MMP14, CXCL12, FZD6	160	127	13528	3.99449	1	0.156131	25.6845
GOTERM_BP_FAT	GO:0045137~development of primary sexual characteristics	6	3.5503	0.0170147	LEP, CCND1, NKX2-1, MMP14, NR5A1, NRIP1	160	127	13528	3.99449	1	0.156131	25.6845
GOTERM_BP_FAT	GO:0001701~in utero embryonic development	7	4.14201	0.0177401	HIF1A, CEBPB, PLCG1, EPAS1, ELL, ADA, ARNT	160	176	13528	3.36278	1	0.161578	26.6274
GOTERM_BP_FAT	GO:0051605~protein maturation by peptide bond cleavage	5	2.95858	0.018536	CR2, C3, CLU, MMP14, FURIN	160	86	13528	4.9157	1	0.16753	27.6491
GOTERM_BP_FAT	GO:0045646~regulation of erythrocyte differentiation	3	1.77515	0.0185656	HIF1A, SPI1, ARNT	160	18	13528	14.0917	1	0.167067	27.6867
GOTERM_BP_FAT	GO:0030183~B cell differentiation	4	2.36686	0.0187296	VCAM1, ADAM17, TCF3, ADA	160	48	13528	7.04583	1	0.167717	27.8955
GOTERM_BP_FAT	GO:0009896~positive regulation of catabolic process	4	2.36686	0.0197828	HIF1A, ITCH, FURIN, ARNT	160	49	13528	6.90204	1	0.175617	29.2225
GOTERM_BP_FAT	GO:0006639~acylglycerol metabolic process	4	2.36686	0.0197828	GPX1, IL6ST, CAT, PTPN11	160	49	13528	6.90204	1	0.175617	29.2225
GOTERM_BP_FAT	GO:0002218~activation of innate immune response	3	1.77515	0.0205916	TICAM1, KLRK1, TLR4	160	19	13528	13.35	1	0.181416	30.2259
GOTERM_BP_FAT	GO:0002758~innate immune response-activating signal transduction	3	1.77515	0.0205916	TICAM1, KLRK1, TLR4	160	19	13528	13.35	1	0.181416	30.2259
GOTERM_BP_FAT	GO:0030335~positive regulation of cell migration	5	2.95858	0.0207488	HIF1A, IL6ST, ADAM17, FURIN, CXCL12	160	89	13528	4.75	1	0.18193	30.4194
GOTERM_BP_FAT	GO:0001934~positive regulation of protein amino acid phosphorylation	5	2.95858	0.0207488	CCND1, IL6ST, CD81, ADAM17, TLR4	160	89	13528	4.75	1	0.18193	30.4194
GOTERM_BP_FAT	GO:0002252~immune effector process	6	3.5503	0.0209452	CR2, C3, TICAM1, CLU, ADAM17, IL7R	160	134	13528	3.78582	1	0.182751	30.6605
GOTERM_BP_FAT	GO:0030097~hemopoiesis	8	4.73373	0.0215223	VCAM1, EPAS1, IL7, PPARG, ADAM17, IL7R, TCF3, ADA	160	236	13528	2.8661	1	0.186572	31.364
GOTERM_BP_FAT	GO:0048732~gland development	6	3.5503	0.0215511	SLC6A3, NKX2-1, PTCH1, NR3C1, GHRHR, NR5A1	160	135	13528	3.75778	1	0.186045	31.399
GOTERM_BP_FAT	GO:0051051~negative regulation of transport	6	3.5503	0.0215511	SNCA, YWHAB, NFKB1, KCNQ1, ADA, PTPN11	160	135	13528	3.75778	1	0.186045	31.399
GOTERM_BP_FAT	GO:0006662~glycerol ether metabolic process	4	2.36686	0.0219855	GPX1, IL6ST, CAT, PTPN11	160	51	13528	6.63137	1	0.188693	31.9239
GOTERM_BP_FAT	GO:0003013~circulatory system process	7	4.14201	0.0225906	GPX1, AGTR2, PPARG, COL1A2, NKX2-1, KCNQ1, CXCL12	160	186	13528	3.18199	1	0.192631	32.6489
GOTERM_BP_FAT	GO:0008015~blood circulation	7	4.14201	0.0225906	GPX1, AGTR2, PPARG, COL1A2, NKX2-1, KCNQ1, CXCL12	160	186	13528	3.18199	1	0.192631	32.6489
GOTERM_BP_FAT	GO:0002685~regulation of leukocyte migration	3	1.77515	0.0227053	ADAM17, CXCL12, ADA	160	20	13528	12.6825	1	0.19275	32.7854
GOTERM_BP_FAT	GO:0006473~protein amino acid acetylation	4	2.36686	0.0231351	ING5, BRD1, NAA10, CREBBP	160	52	13528	6.50385	1	0.195281	33.2949
GOTERM_BP_FAT	GO:0009755~hormone-mediated signaling	4	2.36686	0.0231351	GCG, ADCY2, LATS1, PTPN11	160	52	13528	6.50385	1	0.195281	33.2949
GOTERM_BP_FAT	GO:0018904~organic ether metabolic process	4	2.36686	0.0243168	GPX1, IL6ST, CAT, PTPN11	160	53	13528	6.38113	1	0.203473	34.6771
GOTERM_BP_FAT	GO:0006518~peptide metabolic process	4	2.36686	0.0243168	HAGH, GPX1, GGT7, FURIN	160	53	13528	6.38113	1	0.203473	34.6771
GOTERM_BP_FAT	GO:0007584~response to nutrient	6	3.5503	0.0247518	BGLAP, CCND1, IL6ST, PPARG, PTCH1, VLDLR	160	140	13528	3.62357	1	0.205946	35.179
GOTERM_BP_FAT	GO:0051247~positive regulation of protein metabolic process	8	4.73373	0.0247614	DLC1, CCND1, IL6ST, CD81, ADAM17, TLR4, ITCH, FURIN	160	243	13528	2.78354	1	0.205221	35.19
GOTERM_BP_FAT	GO:0002673~regulation of acute inflammatory response	3	1.77515	0.0249044	C3, IL6ST, PPARG	160	21	13528	12.0786	1	0.205494	35.3542
GOTERM_BP_FAT	GO:0045494~photoreceptor cell maintenance	3	1.77515	0.0249044	BBS4, BBS2, ERCC6	160	21	13528	12.0786	1	0.205494	35.3542
GOTERM_BP_FAT	GO:0045429~positive regulation of nitric oxide biosynthetic process	3	1.77515	0.0249044	AGTR2, TICAM1, KLRK1	160	21	13528	12.0786	1	0.205494	35.3542
GOTERM_BP_FAT	GO:0002706~regulation of lymphocyte mediated immunity	4	2.36686	0.0255307	STAT6, C3, KLRK1, IL7R	160	54	13528	6.26296	1	0.209333	36.0687
GOTERM_BP_FAT	GO:0042398~cellular amino acid derivative biosynthetic process	4	2.36686	0.0255307	HAGH, GGT7, SLC6A3, SNCA	160	54	13528	6.26296	1	0.209333	36.0687
GOTERM_BP_FAT	GO:0042476~odontogenesis	4	2.36686	0.0255307	SMO, BGLAP, COL1A2, FGF4	160	54	13528	6.26296	1	0.209333	36.0687
GOTERM_BP_FAT	GO:0000079~regulation of cyclin-dependent protein kinase activity	4	2.36686	0.0255307	CCND1, ADAM17, GADD45A, LATS1	160	54	13528	6.26296	1	0.209333	36.0687
GOTERM_BP_FAT	GO:0048858~cell projection morphogenesis	8	4.73373	0.0257453	BBS4, SMO, BBS2, NTF3, CLU, NKX2-1, CXCL12, PTPN11	160	245	13528	2.76082	1	0.21011	36.3117
GOTERM_BP_FAT	GO:0002822~regulation of adaptive immune response based on somatic recombination of immune receptors built from immunoglobulin superfamily domains	4	2.36686	0.0267766	STAT6, C3, IL7R, ADA	160	55	13528	6.14909	1	0.216818	37.468
GOTERM_BP_FAT	GO:0002027~regulation of heart rate	3	1.77515	0.0271866	AGTR2, EPAS1, ADA	160	22	13528	11.5295	1	0.21896	37.9221
GOTERM_BP_FAT	GO:0021766~hippocampus development	3	1.77515	0.0271866	BBS4, BBS2, NKX2-1	160	22	13528	11.5295	1	0.21896	37.9221
GOTERM_BP_FAT	GO:0042327~positive regulation of phosphorylation	5	2.95858	0.0274176	CCND1, IL6ST, CD81, ADAM17, TLR4	160	97	13528	4.35825	1	0.219798	38.1766
GOTERM_BP_FAT	GO:0040017~positive regulation of locomotion	5	2.95858	0.0283312	HIF1A, IL6ST, ADAM17, FURIN, CXCL12	160	98	13528	4.31378	1	0.225478	39.1735
GOTERM_BP_FAT	GO:0051272~positive regulation of cell motion	5	2.95858	0.0283312	HIF1A, IL6ST, ADAM17, FURIN, CXCL12	160	98	13528	4.31378	1	0.225478	39.1735
GOTERM_BP_FAT	GO:0002526~acute inflammatory response	5	2.95858	0.0283312	CEBPB, CR2, C3, CLU, TLR4	160	98	13528	4.31378	1	0.225478	39.1735
GOTERM_BP_FAT	GO:0048598~embryonic morphogenesis	9	5.32544	0.0286619	DLC1, BBS4, ITGA8, HIRA, NEUROD1, PTCH1, FGF4, FZD6, LRP5	160	307	13528	2.47866	1	0.226979	39.5306
GOTERM_BP_FAT	GO:0048609~reproductive process in a multicellular organism	12	7.10059	0.0288043	LEP, BBS4, BBS2, GNRH1, SLC6A3, NKX2-1, MMP14, CXCL12, GHRHR, PTPN11, NR5A1, NRIP1	160	487	13528	2.08337	1	0.227146	39.6838
GOTERM_BP_FAT	GO:0032504~multicellular organism reproduction	12	7.10059	0.0288043	LEP, BBS4, BBS2, GNRH1, SLC6A3, NKX2-1, MMP14, CXCL12, GHRHR, PTPN11, NR5A1, NRIP1	160	487	13528	2.08337	1	0.227146	39.6838
GOTERM_BP_FAT	GO:0031667~response to nutrient levels	7	4.14201	0.0288974	LEP, BGLAP, CCND1, IL6ST, PPARG, PTCH1, VLDLR	160	197	13528	3.00431	1	0.226966	39.7836
GOTERM_BP_FAT	GO:0030336~negative regulation of cell migration	4	2.36686	0.0293646	DLC1, MUC2, AGTR2, ADA	160	57	13528	5.93333	1	0.229389	40.2828
GOTERM_BP_FAT	GO:0010565~regulation of cellular ketone metabolic process	4	2.36686	0.0293646	LEP, SNCA, PPARG, NR3C1	160	57	13528	5.93333	1	0.229389	40.2828
GOTERM_BP_FAT	GO:0001755~neural crest cell migration	3	1.77515	0.0295497	SMO, NRTN, HIF1A	160	23	13528	11.0283	1	0.229839	40.4796
GOTERM_BP_FAT	GO:0030030~cell projection organization	10	5.91716	0.0298483	BBS4, SMO, BBS2, NRTN, NTF3, ITGA8, CLU, NKX2-1, CXCL12, PTPN11	160	368	13528	2.29755	1	0.231065	40.7956
GOTERM_BP_FAT	GO:0009628~response to abiotic stimulus	10	5.91716	0.0298483	GPX1, CCND1, ERCC6, KRAS, PPARG, COL3A1, NKX2-1, PTCH1, CAT, MMP14	160	368	13528	2.29755	1	0.231065	40.7956
GOTERM_BP_FAT	GO:0048872~homeostasis of number of cells	5	2.95858	0.0302122	EPAS1, IL7, IKBKB, IL7R, FH	160	100	13528	4.2275	1	0.232727	41.1785
GOTERM_BP_FAT	GO:0016331~morphogenesis of embryonic epithelium	4	2.36686	0.0307064	DLC1, BBS4, PTCH1, FZD6	160	58	13528	5.83103	1	0.235256	41.6949
GOTERM_BP_FAT	GO:0002697~regulation of immune effector process	5	2.95858	0.0311798	STAT6, C3, KLRK1, IL13, IL7R	160	101	13528	4.18564	1	0.237619	42.1855
GOTERM_BP_FAT	GO:0031175~neuron projection development	8	4.73373	0.0316374	BBS4, SMO, NRTN, NTF3, CLU, NKX2-1, CXCL12, PTPN11	160	256	13528	2.64219	1	0.239851	42.6561
GOTERM_BP_FAT	GO:0032990~cell part morphogenesis	8	4.73373	0.0316374	BBS4, SMO, BBS2, NTF3, CLU, NKX2-1, CXCL12, PTPN11	160	256	13528	2.64219	1	0.239851	42.6561
GOTERM_BP_FAT	GO:0009411~response to UV	4	2.36686	0.0320802	GPX1, CCND1, ERCC6, CAT	160	59	13528	5.7322	1	0.24196	43.1079
GOTERM_BP_FAT	GO:0043406~positive regulation of MAP kinase activity	5	2.95858	0.0321656	ERCC6, KRAS, CD81, SHC1, PTPN11	160	102	13528	4.14461	1	0.241683	43.1946
GOTERM_BP_FAT	GO:0007548~sex differentiation	6	3.5503	0.0328822	LEP, CCND1, NKX2-1, MMP14, NR5A1, NRIP1	160	151	13528	3.3596	1	0.245568	43.9179
GOTERM_BP_FAT	GO:0010817~regulation of hormone levels	6	3.5503	0.0328822	LEP, NEUROD1, NR3C1, FURIN, GHRHR, PTPN11	160	151	13528	3.3596	1	0.245568	43.9179
GOTERM_BP_FAT	GO:0051329~interphase of mitotic cell cycle	5	2.95858	0.0331694	CCND1, ADAM17, TCF3, GADD45A, LATS1	160	103	13528	4.10437	1	0.246601	44.2053
GOTERM_BP_FAT	GO:0051090~regulation of transcription factor activity	5	2.95858	0.0331694	KRAS, TICAM1, TLR4, CAT, IKBKB	160	103	13528	4.10437	1	0.246601	44.2053
GOTERM_BP_FAT	GO:0007010~cytoskeleton organization	11	6.50888	0.0331858	DLC1, BBS4, SS18, BBS2, KRAS, CKAP5, ACTN1, MYOZ1, PPP4C, GADD45A, GABARAP	160	436	13528	2.13314	1	0.245861	44.2216
GOTERM_BP_FAT	GO:0043543~protein amino acid acylation	4	2.36686	0.0334856	ING5, BRD1, NAA10, CREBBP	160	60	13528	5.63667	1	0.246967	44.52
GOTERM_BP_FAT	GO:0030900~forebrain development	6	3.5503	0.0336642	DLC1, BBS4, BBS2, SLC6A3, NKX2-1, GHRHR	160	152	13528	3.3375	1	0.24728	44.6971
GOTERM_BP_FAT	GO:0051098~regulation of binding	6	3.5503	0.0344843	SMO, KRAS, TICAM1, TLR4, CAT, IKBKB	160	153	13528	3.31569	1	0.251709	45.5034
GOTERM_BP_FAT	GO:0043954~cellular component maintenance	3	1.77515	0.0345099	BBS4, BBS2, ERCC6	160	25	13528	10.146	1	0.251025	45.5283
GOTERM_BP_FAT	GO:0021675~nerve development	3	1.77515	0.0345099	SMO, NRTN, NTF3	160	25	13528	10.146	1	0.251025	45.5283
GOTERM_BP_FAT	GO:0001501~skeletal system development	9	5.32544	0.0348086	FGF6, SMO, BGLAP, TNFRSF11A, COL3A1, COL1A2, MMP14, FGF4, ANXA2	160	319	13528	2.38542	1	0.252082	45.8191
GOTERM_BP_FAT	GO:0042789~mRNA transcription from RNA polymerase II promoter	2	1.18343	0.0348499	HIF1A, ARNT	160	3	13528	56.3667	1	0.251501	45.8593
GOTERM_BP_FAT	GO:0032497~detection of lipopolysaccharide	2	1.18343	0.0348499	LY96, TLR4	160	3	13528	56.3667	1	0.251501	45.8593
GOTERM_BP_FAT	GO:0002703~regulation of leukocyte mediated immunity	4	2.36686	0.0349227	STAT6, C3, KLRK1, IL7R	160	61	13528	5.54426	1	0.251123	45.9298
GOTERM_BP_FAT	GO:0009636~response to toxin	4	2.36686	0.0349227	GPX1, ERCC6, SLC7A8, IKBKB	160	61	13528	5.54426	1	0.251123	45.9298
GOTERM_BP_FAT	GO:0040013~negative regulation of locomotion	4	2.36686	0.0349227	DLC1, MUC2, AGTR2, ADA	160	61	13528	5.54426	1	0.251123	45.9298
GOTERM_BP_FAT	GO:0007265~Ras protein signal transduction	5	2.95858	0.0352317	KRAS, YWHAB, COL1A2, SHC1, MAPKAPK2	160	105	13528	4.02619	1	0.252233	46.2285
GOTERM_BP_FAT	GO:0043434~response to peptide hormone stimulus	6	3.5503	0.0353281	LEP, PPARG, SHC1, PARP1, GHRHR, VLDLR	160	154	13528	3.29416	1	0.252003	46.3214
GOTERM_BP_FAT	GO:0051325~interphase	5	2.95858	0.0362902	CCND1, ADAM17, TCF3, GADD45A, LATS1	160	106	13528	3.98821	1	0.257158	47.2399
GOTERM_BP_FAT	GO:0042445~hormone metabolic process	5	2.95858	0.0362902	LEP, NR3C1, FURIN, GHRHR, PTPN11	160	106	13528	3.98821	1	0.257158	47.2399
GOTERM_BP_FAT	GO:0022415~viral reproductive process	4	2.36686	0.0363912	DERL1, CD81, ITCH, FURIN	160	62	13528	5.45484	1	0.256943	47.3355
GOTERM_BP_FAT	GO:0035303~regulation of dephosphorylation	3	1.77515	0.0371026	DLC1, AGTR2, YWHAB	160	26	13528	9.75577	1	0.260478	48.004
GOTERM_BP_FAT	GO:0051353~positive regulation of oxidoreductase activity	3	1.77515	0.0371026	AGTR2, HIF1A, KRAS	160	26	13528	9.75577	1	0.260478	48.004
GOTERM_BP_FAT	GO:0006695~cholesterol biosynthetic process	3	1.77515	0.0371026	MVD, CYP51A1, IDI1	160	26	13528	9.75577	1	0.260478	48.004
GOTERM_BP_FAT	GO:0000122~negative regulation of transcription from RNA polymerase II promoter	8	4.73373	0.0377269	PPARG, SPI1, NKX2-1, TLE1, NFKB1, SMARCA2, ZNF174, NRIP1	160	266	13528	2.54286	1	0.263443	48.584
GOTERM_BP_FAT	GO:0008585~female gonad development	4	2.36686	0.0394224	LEP, MMP14, NR5A1, NRIP1	160	64	13528	5.28437	1	0.272825	50.1288
GOTERM_BP_FAT	GO:0045428~regulation of nitric oxide biosynthetic process	3	1.77515	0.0397678	AGTR2, TICAM1, KLRK1	160	27	13528	9.39444	1	0.27402	50.4381
GOTERM_BP_FAT	GO:0032535~regulation of cellular component size	8	4.73373	0.0410428	FGFR2, AGTR2, IL7, PPARG, ADAM17, IL7R, CXCL12, LATS1	160	271	13528	2.49594	1	0.280706	51.5642
GOTERM_BP_FAT	GO:0007159~leukocyte adhesion	3	1.77515	0.0425032	VCAM1, SELE, SELPLG	160	28	13528	9.05893	1	0.28837	52.8245
GOTERM_BP_FAT	GO:0021983~pituitary gland development	3	1.77515	0.0425032	SLC6A3, NKX2-1, GHRHR	160	28	13528	9.05893	1	0.28837	52.8245
GOTERM_BP_FAT	GO:0006749~glutathione metabolic process	3	1.77515	0.0425032	HAGH, GPX1, GGT7	160	28	13528	9.05893	1	0.28837	52.8245
GOTERM_BP_FAT	GO:0033273~response to vitamin	4	2.36686	0.0425778	BGLAP, CCND1, PPARG, PTCH1	160	66	13528	5.12424	1	0.287906	52.888
GOTERM_BP_FAT	GO:0060562~epithelial tube morphogenesis	4	2.36686	0.0442017	DLC1, BBS4, PTCH1, FZD6	160	67	13528	5.04776	1	0.296362	54.2513
GOTERM_BP_FAT	GO:0008543~fibroblast growth factor receptor signaling pathway	3	1.77515	0.045307	FGF6, FGFR2, FGF4	160	29	13528	8.74655	1	0.301738	55.1578
GOTERM_BP_FAT	GO:0030199~collagen fibril organization	3	1.77515	0.045307	COL3A1, COL1A2, ANXA2	160	29	13528	8.74655	1	0.301738	55.1578
GOTERM_BP_FAT	GO:0045807~positive regulation of endocytosis	3	1.77515	0.045307	C3, SNCA, SELE	160	29	13528	8.74655	1	0.301738	55.1578
GOTERM_BP_FAT	GO:0006958~complement activation, classical pathway	3	1.77515	0.045307	CR2, C3, CLU	160	29	13528	8.74655	1	0.301738	55.1578
GOTERM_BP_FAT	GO:0009991~response to extracellular stimulus	7	4.14201	0.04554	LEP, BGLAP, CCND1, IL6ST, PPARG, PTCH1, VLDLR	160	220	13528	2.69023	1	0.302135	55.3468
GOTERM_BP_FAT	GO:0032352~positive regulation of hormone metabolic process	2	1.18343	0.0461963	HIF1A, ARNT	160	4	13528	42.275	1	0.304905	55.8749
GOTERM_BP_FAT	GO:0060296~regulation of cilium beat frequency involved in ciliary motility	2	1.18343	0.0461963	BBS4, BBS2	160	4	13528	42.275	1	0.304905	55.8749
GOTERM_BP_FAT	GO:0060295~regulation of cilium movement involved in ciliary motility	2	1.18343	0.0461963	BBS4, BBS2	160	4	13528	42.275	1	0.304905	55.8749
GOTERM_BP_FAT	GO:0033089~positive regulation of T cell differentiation in the thymus	2	1.18343	0.0461963	IL7R, ADA	160	4	13528	42.275	1	0.304905	55.8749
GOTERM_BP_FAT	GO:0046886~positive regulation of hormone biosynthetic process	2	1.18343	0.0461963	HIF1A, ARNT	160	4	13528	42.275	1	0.304905	55.8749
GOTERM_BP_FAT	GO:0055094~response to lipoprotein stimulus	2	1.18343	0.0461963	PPARG, ADAM17	160	4	13528	42.275	1	0.304905	55.8749
GOTERM_BP_FAT	GO:0006575~cellular amino acid derivative metabolic process	6	3.5503	0.0462184	HAGH, GPX1, GGT7, EPAS1, SLC6A3, SNCA	160	166	13528	3.05602	1	0.304109	55.8926
GOTERM_BP_FAT	GO:0048666~neuron development	9	5.32544	0.0469407	LEP, BBS4, SMO, NRTN, NTF3, CLU, NKX2-1, CXCL12, PTPN11	160	339	13528	2.24469	1	0.307212	56.4669
GOTERM_BP_FAT	GO:0007631~feeding behavior	4	2.36686	0.0475411	LEP, GCG, CCKBR, NKX2-1	160	69	13528	4.90145	1	0.309611	56.9388
GOTERM_BP_FAT	GO:0031099~regeneration	4	2.36686	0.0475411	SMO, GPX1, CCND1, PPARG	160	69	13528	4.90145	1	0.309611	56.9388
GOTERM_BP_FAT	GO:0050729~positive regulation of inflammatory response	3	1.77515	0.0481771	C3, IL6ST, TLR4	160	30	13528	8.455	1	0.312181	57.4335
GOTERM_BP_FAT	GO:0019221~cytokine-mediated signaling pathway	4	2.36686	0.0492561	LEP, STAT6, KRAS, IL6ST	160	70	13528	4.83143	1	0.317132	58.2605
GOTERM_BP_FAT	GO:0010605~negative regulation of macromolecule metabolic process	15	8.87574	0.0504679	SNCA, PPARG, YWHAB, SPI1, TLE1, NFKB1, FURIN, NRIP1, ZNF174, MAD2L1, NKX2-1, VPS28, SMARCA2, KCNQ1, BAZ2A	160	734	13528	1.72786	1	0.322733	59.1713
GOTERM_BP_FAT	GO:0016032~viral reproduction	4	2.36686	0.0510011	DERL1, CD81, ITCH, FURIN	160	71	13528	4.76338	1	0.324643	59.5661
GOTERM_BP_FAT	GO:0002455~humoral immune response mediated by circulating immunoglobulin	3	1.77515	0.0511117	CR2, C3, CLU	160	31	13528	8.18226	1	0.324291	59.6475
GOTERM_BP_FAT	GO:0002821~positive regulation of adaptive immune response	3	1.77515	0.0511117	C3, IL6ST, ADA	160	31	13528	8.18226	1	0.324291	59.6475
GOTERM_BP_FAT	GO:0060429~epithelium development	7	4.14201	0.0515893	DLC1, BBS4, GPX1, PPARG, NKX2-1, PTCH1, FZD6	160	227	13528	2.60727	1	0.325886	59.9974
GOTERM_BP_FAT	GO:0001932~regulation of protein amino acid phosphorylation	6	3.5503	0.0533971	CCND1, ERCC6, IL6ST, CD81, ADAM17, TLR4	160	173	13528	2.93237	1	0.334438	61.2961
GOTERM_BP_FAT	GO:0051297~centrosome organization	3	1.77515	0.0541088	BBS4, CKAP5, GADD45A	160	32	13528	7.92656	1	0.337182	61.7963
GOTERM_BP_FAT	GO:0045582~positive regulation of T cell differentiation	3	1.77515	0.0541088	IL7, IL7R, ADA	160	32	13528	7.92656	1	0.337182	61.7963
GOTERM_BP_FAT	GO:0021761~limbic system development	3	1.77515	0.0541088	BBS4, BBS2, NKX2-1	160	32	13528	7.92656	1	0.337182	61.7963
GOTERM_BP_FAT	GO:0003007~heart morphogenesis	4	2.36686	0.0545803	DLC1, BBS4, SMO, PTCH1	160	73	13528	4.63288	1	0.338662	62.1244
GOTERM_BP_FAT	GO:0032270~positive regulation of cellular protein metabolic process	7	4.14201	0.057149	DLC1, CCND1, IL6ST, CD81, ADAM17, TLR4, FURIN	160	233	13528	2.54013	1	0.350805	63.8656
GOTERM_BP_FAT	GO:0021987~cerebral cortex development	3	1.77515	0.0571666	BBS4, BBS2, NKX2-1	160	33	13528	7.68636	1	0.34992	63.8773
GOTERM_BP_FAT	GO:0045639~positive regulation of myeloid cell differentiation	3	1.77515	0.0571666	LEP, HIF1A, ARNT	160	33	13528	7.68636	1	0.34992	63.8773
GOTERM_BP_FAT	GO:0014032~neural crest cell development	3	1.77515	0.0571666	SMO, NRTN, HIF1A	160	33	13528	7.68636	1	0.34992	63.8773
GOTERM_BP_FAT	GO:0014033~neural crest cell differentiation	3	1.77515	0.0571666	SMO, NRTN, HIF1A	160	33	13528	7.68636	1	0.34992	63.8773
GOTERM_BP_FAT	GO:0060632~regulation of microtubule-based movement	2	1.18343	0.05741	BBS4, BBS2	160	5	13528	33.82	1	0.350175	64.0383
GOTERM_BP_FAT	GO:0032490~detection of molecule of bacterial origin	2	1.18343	0.05741	LY96, TLR4	160	5	13528	33.82	1	0.350175	64.0383
GOTERM_BP_FAT	GO:0000302~response to reactive oxygen species	4	2.36686	0.0582767	GPX1, ERCC6, CAT, ADA	160	75	13528	4.50933	1	0.353543	64.6059
GOTERM_BP_FAT	GO:0045892~negative regulation of transcription, DNA-dependent	9	5.32544	0.0592082	PPARG, SPI1, NKX2-1, TLE1, NFKB1, BAZ2A, SMARCA2, ZNF174, NRIP1	160	356	13528	2.1375	1	0.357196	65.2067
GOTERM_BP_FAT	GO:0006584~catecholamine metabolic process	3	1.77515	0.0602832	EPAS1, SLC6A3, SNCA	160	34	13528	7.46029	1	0.361512	65.8881
GOTERM_BP_FAT	GO:0009712~catechol metabolic process	3	1.77515	0.0602832	EPAS1, SLC6A3, SNCA	160	34	13528	7.46029	1	0.361512	65.8881
GOTERM_BP_FAT	GO:0034311~diol metabolic process	3	1.77515	0.0602832	EPAS1, SLC6A3, SNCA	160	34	13528	7.46029	1	0.361512	65.8881
GOTERM_BP_FAT	GO:0042110~T cell activation	5	2.95858	0.0612894	IL7, ADAM17, IL7R, CXCL12, ADA	160	126	13528	3.35516	1	0.365441	66.5144
GOTERM_BP_FAT	GO:0032269~negative regulation of cellular protein metabolic process	6	3.5503	0.061302	MAD2L1, SNCA, YWHAB, NFKB1, VPS28, FURIN	160	180	13528	2.81833	1	0.364519	66.5221
GOTERM_BP_FAT	GO:0040029~regulation of gene expression, epigenetic	4	2.36686	0.0620884	GPX1, ASF1A, BAZ2A, KCNQ1	160	77	13528	4.39221	1	0.367341	67.004
GOTERM_BP_FAT	GO:0008016~regulation of heart contraction	4	2.36686	0.0620884	AGTR2, EPAS1, KCNQ1, ADA	160	77	13528	4.39221	1	0.367341	67.004
GOTERM_BP_FAT	GO:0018958~phenol metabolic process	3	1.77515	0.063457	EPAS1, SLC6A3, SNCA	160	35	13528	7.24714	1	0.372914	67.827
GOTERM_BP_FAT	GO:0045621~positive regulation of lymphocyte differentiation	3	1.77515	0.063457	IL7, IL7R, ADA	160	35	13528	7.24714	1	0.372914	67.827
GOTERM_BP_FAT	GO:0016126~sterol biosynthetic process	3	1.77515	0.063457	MVD, CYP51A1, IDI1	160	35	13528	7.24714	1	0.372914	67.827
GOTERM_BP_FAT	GO:0006984~ER-nuclear signaling pathway	3	1.77515	0.063457	CCND1, DERL1, INSIG1	160	35	13528	7.24714	1	0.372914	67.827
GOTERM_BP_FAT	GO:0031023~microtubule organizing center organization	3	1.77515	0.063457	BBS4, CKAP5, GADD45A	160	35	13528	7.24714	1	0.372914	67.827
GOTERM_BP_FAT	GO:0051253~negative regulation of RNA metabolic process	9	5.32544	0.063981	PPARG, SPI1, NKX2-1, TLE1, NFKB1, BAZ2A, SMARCA2, ZNF174, NRIP1	160	362	13528	2.10207	1	0.374416	68.137
GOTERM_BP_FAT	GO:0000165~MAPKKK cascade	6	3.5503	0.0655672	NRTN, ERCC6, CD81, SHC1, MAPKAPK2, PTPN11	160	184	13528	2.75707	1	0.3809	69.0582
GOTERM_BP_FAT	GO:0006959~humoral immune response	4	2.36686	0.0660135	CR2, C3, IL7, CLU	160	79	13528	4.28101	1	0.38199	69.3129
GOTERM_BP_FAT	GO:0002263~cell activation during immune response	3	1.77515	0.0666861	TICAM1, TLR4, ADA	160	36	13528	7.04583	1	0.384122	69.6929
GOTERM_BP_FAT	GO:0002366~leukocyte activation during immune response	3	1.77515	0.0666861	TICAM1, TLR4, ADA	160	36	13528	7.04583	1	0.384122	69.6929
GOTERM_BP_FAT	GO:0032675~regulation of interleukin-6 production	3	1.77515	0.0666861	CEBPB, TICAM1, TLR4	160	36	13528	7.04583	1	0.384122	69.6929
GOTERM_BP_FAT	GO:0031331~positive regulation of cellular catabolic process	3	1.77515	0.0666861	HIF1A, FURIN, ARNT	160	36	13528	7.04583	1	0.384122	69.6929
GOTERM_BP_FAT	GO:0043065~positive regulation of apoptosis	10	5.91716	0.0673118	DLC1, MUC2, GPX1, AGTR2, ERCC6, CEBPB, TICAM1, YWHAB, TLR4, NR3C1	160	430	13528	1.96628	1	0.386018	70.0424
GOTERM_BP_FAT	GO:0042416~dopamine biosynthetic process	2	1.18343	0.0684927	SLC6A3, SNCA	160	6	13528	28.1833	1	0.390438	70.6918
GOTERM_BP_FAT	GO:0009299~mRNA transcription	2	1.18343	0.0684927	HIF1A, ARNT	160	6	13528	28.1833	1	0.390438	70.6918
GOTERM_BP_FAT	GO:0035304~regulation of protein amino acid dephosphorylation	2	1.18343	0.0684927	DLC1, YWHAB	160	6	13528	28.1833	1	0.390438	70.6918
GOTERM_BP_FAT	GO:0043068~positive regulation of programmed cell death	10	5.91716	0.0696505	DLC1, MUC2, GPX1, AGTR2, ERCC6, CEBPB, TICAM1, YWHAB, TLR4, NR3C1	160	433	13528	1.95266	1	0.394699	71.3156
GOTERM_BP_FAT	GO:0031401~positive regulation of protein modification process	6	3.5503	0.069765	DLC1, CCND1, IL6ST, CD81, ADAM17, TLR4	160	187	13528	2.71283	1	0.394215	71.3766
GOTERM_BP_FAT	GO:0051248~negative regulation of protein metabolic process	6	3.5503	0.069765	MAD2L1, SNCA, YWHAB, NFKB1, VPS28, FURIN	160	187	13528	2.71283	1	0.394215	71.3766
GOTERM_BP_FAT	GO:0021536~diencephalon development	3	1.77515	0.0699688	SLC6A3, NKX2-1, GHRHR	160	37	13528	6.85541	1	0.394137	71.4849
GOTERM_BP_FAT	GO:0000278~mitotic cell cycle	9	5.32544	0.0707095	BGLAP, CCND1, MAD2L1, CKAP5, ADAM17, TCF3, GADD45A, LATS1, FGF4	160	370	13528	2.05662	1	0.396464	71.8752
GOTERM_BP_FAT	GO:0010942~positive regulation of cell death	10	5.91716	0.0712377	DLC1, MUC2, GPX1, AGTR2, ERCC6, CEBPB, TICAM1, YWHAB, TLR4, NR3C1	160	435	13528	1.94368	1	0.397825	72.1504
GOTERM_BP_FAT	GO:0016055~Wnt receptor signaling pathway	5	2.95858	0.0717393	DVL3, CCND1, TLE1, FZD6, LRP5	160	133	13528	3.17857	1	0.399057	72.4094
GOTERM_BP_FAT	GO:0000187~activation of MAPK activity	4	2.36686	0.0721091	ERCC6, CD81, SHC1, PTPN11	160	82	13528	4.12439	1	0.399699	72.599
GOTERM_BP_FAT	GO:0052548~regulation of endopeptidase activity	4	2.36686	0.0721091	DLC1, GPX1, SNCA, FURIN	160	82	13528	4.12439	1	0.399699	72.599
GOTERM_BP_FAT	GO:0030182~neuron differentiation	10	5.91716	0.0736607	LEP, BBS4, SMO, NRTN, CEBPB, NTF3, CLU, NKX2-1, CXCL12, PTPN11	160	438	13528	1.93037	1	0.405511	73.3808
GOTERM_BP_FAT	GO:0010629~negative regulation of gene expression	11	6.50888	0.0737194	PPARG, YWHAB, SPI1, NKX2-1, TLE1, NFKB1, BAZ2A, KCNQ1, SMARCA2, ZNF174, NRIP1	160	504	13528	1.84534	1	0.404772	73.41
GOTERM_BP_FAT	GO:0030072~peptide hormone secretion	3	1.77515	0.0766883	LEP, NEUROD1, GHRHR	160	39	13528	6.50385	1	0.416568	74.8463
GOTERM_BP_FAT	GO:0017015~regulation of transforming growth factor beta receptor signaling pathway	3	1.77515	0.0766883	ITGA8, ADAM17, FURIN	160	39	13528	6.50385	1	0.416568	74.8463
GOTERM_BP_FAT	GO:0007017~microtubule-based process	7	4.14201	0.0781967	BBS4, SS18, BBS2, CKAP5, PPP4C, GADD45A, GABARAP	160	253	13528	2.33933	1	0.42196	75.5478
GOTERM_BP_FAT	GO:0031960~response to corticosteroid stimulus	4	2.36686	0.0784476	CCND1, KRAS, GNRH1, GHRHR	160	85	13528	3.97882	1	0.422007	75.6627
GOTERM_BP_FAT	GO:0001558~regulation of cell growth	6	3.5503	0.0791291	NOV, AGTR2, IL7, PPARG, ADAM17, ITCH	160	194	13528	2.61495	1	0.423858	75.9721
GOTERM_BP_FAT	GO:0006474~N-terminal protein amino acid acetylation	2	1.18343	0.079446	NAA10, CREBBP	160	7	13528	24.1571	1	0.424175	76.1147
GOTERM_BP_FAT	GO:0032722~positive regulation of chemokine production	2	1.18343	0.079446	HIF1A, ADAM17	160	7	13528	24.1571	1	0.424175	76.1147
GOTERM_BP_FAT	GO:0030949~positive regulation of vascular endothelial growth factor receptor signaling pathway	2	1.18343	0.079446	HIF1A, ARNT	160	7	13528	24.1571	1	0.424175	76.1147
GOTERM_BP_FAT	GO:0001774~microglial cell activation	2	1.18343	0.079446	SNCA, TLR4	160	7	13528	24.1571	1	0.424175	76.1147
GOTERM_BP_FAT	GO:0033327~Leydig cell differentiation	2	1.18343	0.079446	CCND1, NKX2-1	160	7	13528	24.1571	1	0.424175	76.1147
GOTERM_BP_FAT	GO:0045821~positive regulation of glycolysis	2	1.18343	0.079446	HIF1A, ARNT	160	7	13528	24.1571	1	0.424175	76.1147
GOTERM_BP_FAT	GO:0009416~response to light stimulus	5	2.95858	0.0797258	GPX1, CCND1, ERCC6, KRAS, CAT	160	138	13528	3.06341	1	0.424336	76.24
GOTERM_BP_FAT	GO:0052547~regulation of peptidase activity	4	2.36686	0.0806131	DLC1, GPX1, SNCA, FURIN	160	86	13528	3.93256	1	0.427009	76.6332
GOTERM_BP_FAT	GO:0002443~leukocyte mediated immunity	4	2.36686	0.0806131	CR2, C3, CLU, ADAM17	160	86	13528	3.93256	1	0.427009	76.6332
GOTERM_BP_FAT	GO:0030534~adult behavior	4	2.36686	0.0806131	LEP, BBS4, BBS2, SNCA	160	86	13528	3.93256	1	0.427009	76.6332
GOTERM_BP_FAT	GO:0002790~peptide secretion	3	1.77515	0.0836024	LEP, NEUROD1, GHRHR	160	41	13528	6.18659	1	0.438223	77.9131
GOTERM_BP_FAT	GO:0032507~maintenance of protein location in cell	3	1.77515	0.0836024	BBS4, YWHAB, NR5A1	160	41	13528	6.18659	1	0.438223	77.9131
GOTERM_BP_FAT	GO:0010553~negative regulation of specific transcription from RNA polymerase II promoter	3	1.77515	0.0836024	PPARG, NFKB1, SMARCA2	160	41	13528	6.18659	1	0.438223	77.9131
GOTERM_BP_FAT	GO:0034329~cell junction assembly	3	1.77515	0.0836024	DLC1, ACTN1, CTNNA1	160	41	13528	6.18659	1	0.438223	77.9131
GOTERM_BP_FAT	GO:0043405~regulation of MAP kinase activity	5	2.95858	0.0847218	ERCC6, KRAS, CD81, SHC1, PTPN11	160	141	13528	2.99823	1	0.441721	78.3752
GOTERM_BP_FAT	GO:0051146~striated muscle cell differentiation	4	2.36686	0.0850213	MYOD1, GPX1, KRAS, MYOZ1	160	88	13528	3.84318	1	0.441906	78.4973
GOTERM_BP_FAT	GO:0044087~regulation of cellular component biogenesis	5	2.95858	0.0864208	DLC1, BBS4, CLU, MMP14, LATS1	160	142	13528	2.97711	1	0.446467	79.0591
GOTERM_BP_FAT	GO:0051129~negative regulation of cellular component organization	5	2.95858	0.0864208	DLC1, MAD2L1, SNCA, CLU, MMP14	160	142	13528	2.97711	1	0.446467	79.0591
GOTERM_BP_FAT	GO:0009314~response to radiation	6	3.5503	0.0865331	GPX1, CCND1, ERCC6, KRAS, COL3A1, CAT	160	200	13528	2.5365	1	0.445897	79.1036
GOTERM_BP_FAT	GO:0006956~complement activation	3	1.77515	0.0871285	CR2, C3, CLU	160	42	13528	6.03929	1	0.447235	79.338
GOTERM_BP_FAT	GO:0007160~cell-matrix adhesion	4	2.36686	0.0872633	DLC1, ITGA8, COL3A1, ACTN1	160	89	13528	3.8	1	0.446756	79.3907
GOTERM_BP_FAT	GO:0015980~energy derivation by oxidation of organic compounds	5	2.95858	0.0899571	LEP, IL6ST, SNCA, CAT, FH	160	144	13528	2.93576	1	0.456238	80.4179
GOTERM_BP_FAT	GO:0016540~protein autoprocessing	2	1.18343	0.0902712	PARP1, CAPN1	160	8	13528	21.1375	1	0.456434	80.5345
GOTERM_BP_FAT	GO:0032026~response to magnesium ion	2	1.18343	0.0902712	CCND1, SNCA	160	8	13528	21.1375	1	0.456434	80.5345
GOTERM_BP_FAT	GO:0051457~maintenance of protein location in nucleus	2	1.18343	0.0902712	BBS4, NR5A1	160	8	13528	21.1375	1	0.456434	80.5345
GOTERM_BP_FAT	GO:0002281~macrophage activation during immune response	2	1.18343	0.0902712	TICAM1, TLR4	160	8	13528	21.1375	1	0.456434	80.5345
GOTERM_BP_FAT	GO:0060123~regulation of growth hormone secretion	2	1.18343	0.0902712	GHRHR, PTPN11	160	8	13528	21.1375	1	0.456434	80.5345
GOTERM_BP_FAT	GO:0002016~regulation of blood volume by renin-angiotensin	2	1.18343	0.0902712	AGTR2, NKX2-1	160	8	13528	21.1375	1	0.456434	80.5345
GOTERM_BP_FAT	GO:0006111~regulation of gluconeogenesis	2	1.18343	0.0902712	LEP, NR3C1	160	8	13528	21.1375	1	0.456434	80.5345
GOTERM_BP_FAT	GO:0040015~negative regulation of multicellular organism growth	2	1.18343	0.0902712	BBS2, PTCH1	160	8	13528	21.1375	1	0.456434	80.5345
GOTERM_BP_FAT	GO:0002861~regulation of inflammatory response to antigenic stimulus	2	1.18343	0.0902712	GPX1, C3	160	8	13528	21.1375	1	0.456434	80.5345
GOTERM_BP_FAT	GO:0045737~positive regulation of cyclin-dependent protein kinase activity	2	1.18343	0.0902712	CCND1, ADAM17	160	8	13528	21.1375	1	0.456434	80.5345
GOTERM_BP_FAT	GO:0002541~activation of plasma proteins involved in acute inflammatory response	3	1.77515	0.0906985	CR2, C3, CLU	160	43	13528	5.89884	1	0.457064	80.692
GOTERM_BP_FAT	GO:0019058~viral infectious cycle	3	1.77515	0.0906985	CD81, ITCH, FURIN	160	43	13528	5.89884	1	0.457064	80.692
GOTERM_BP_FAT	GO:0016481~negative regulation of transcription	10	5.91716	0.0920452	PPARG, YWHAB, SPI1, NKX2-1, TLE1, NFKB1, BAZ2A, SMARCA2, ZNF174, NRIP1	160	459	13528	1.84205	1	0.461194	81.1808
GOTERM_BP_FAT	GO:0002699~positive regulation of immune effector process	3	1.77515	0.0943109	C3, KLRK1, IL13	160	44	13528	5.76477	1	0.468726	81.9768
GOTERM_BP_FAT	GO:0007389~pattern specification process	7	4.14201	0.0952186	SMO, NKX2-1, NEUROD1, PTCH1, CXCL12, LRP5, PITX2	160	267	13528	2.21667	1	0.471097	82.2867
GOTERM_BP_FAT	GO:0008361~regulation of cell size	6	3.5503	0.0972709	FGFR2, AGTR2, IL7, PPARG, ADAM17, IL7R	160	206	13528	2.46262	1	0.477664	82.969
GOTERM_BP_FAT	GO:0046879~hormone secretion	3	1.77515	0.0979644	LEP, NEUROD1, GHRHR	160	45	13528	5.63667	1	0.479182	83.1939
GOTERM_BP_FAT	GO:0019725~cellular homeostasis	10	5.91716	0.0987271	GPX1, HIF1A, SLC4A11, NTF3, CCKBR, IL6ST, SNCA, ASNA1, KCNQ1, CXCL12	160	466	13528	1.81438	1	0.480942	83.438
GOTERM_BP_FAT	GO:0010551~regulation of specific transcription from RNA polymerase II promoter	4	2.36686	0.0988412	PPARG, NFKB1, TCF3, SMARCA2	160	94	13528	3.59787	1	0.480338	83.4742
GOTERM_CC_FAT	GO:0005654~nucleoplasm	27	15.9763	2.55072e-05	ING5, TAF1C, MYOD1, ELL, WBP11, NFKB1, ERCC6, RTF1, NKX2-1, TCF3, CHD4, PITX2, BRD1, BGLAP, NUP153, EPAS1, CREBBP, YWHAB, TLE1, NRIP1, CCND1, HIF1A, UBTF, SMARCA5, PAF1, PARP1, SMARCA2	158	882	12782	2.47649	0.00693937	0.00693937	0.0335896
GOTERM_CC_FAT	GO:0031974~membrane-enclosed lumen	43	25.4438	4.23241e-05	ING5, MYOD1, TAF1C, MVD, ELL, MRPS12, CLU, NFKB1, WBP11, NR3C1, GHRHR, ZNF174, STAT6, ERCC6, RTF1, NKX2-1, CAT, BAZ2A, TCF3, CHD4, PITX2, FH, BRD1, NUP153, BGLAP, CEBPB, EPAS1, CREBBP, YWHAB, ACTN1, TLE1, NRIP1, HAGH, CCND1, HIF1A, UBTF, PPBP, C1QBP, SMARCA5, PAF1, ASNA1, PARP1, SMARCA2	158	1856	12782	1.87427	0.0114882	0.0057607	0.0557294
GOTERM_CC_FAT	GO:0043233~organelle lumen	42	24.8521	5.98891e-05	ING5, MYOD1, TAF1C, MVD, ELL, MRPS12, CLU, NFKB1, WBP11, NR3C1, GHRHR, ZNF174, STAT6, ERCC6, RTF1, NKX2-1, BAZ2A, TCF3, CHD4, PITX2, FH, BRD1, NUP153, BGLAP, CEBPB, EPAS1, CREBBP, YWHAB, ACTN1, TLE1, NRIP1, HAGH, CCND1, HIF1A, UBTF, PPBP, C1QBP, SMARCA5, PAF1, ASNA1, PARP1, SMARCA2	158	1820	12782	1.86689	0.0162173	0.00543525	0.0788494
GOTERM_CC_FAT	GO:0005615~extracellular space	22	13.0178	9.65486e-05	PLAT, FGF6, BGLAP, GNRH1, IL7, C3, IL6ST, LY96, CLU, COL3A1, IL13, FURIN, CXCL12, ADA, LEP, VCAM1, GRP, PPBP, SCGB1D2, COL1A2, SELE, VLDLR	158	685	12782	2.59821	0.0260147	0.00656809	0.127087
GOTERM_CC_FAT	GO:0031981~nuclear lumen	35	20.7101	0.000141505	ING5, TAF1C, MYOD1, ELL, NFKB1, WBP11, NR3C1, GHRHR, ZNF174, STAT6, ERCC6, RTF1, NKX2-1, BAZ2A, TCF3, CHD4, PITX2, BRD1, BGLAP, NUP153, CEBPB, EPAS1, CREBBP, YWHAB, ACTN1, TLE1, NRIP1, CCND1, HIF1A, UBTF, SMARCA5, PAF1, ASNA1, PARP1, SMARCA2	158	1450	12782	1.95273	0.0378968	0.00769694	0.186212
GOTERM_CC_FAT	GO:0044451~nucleoplasm part	19	11.2426	0.000158101	ING5, BRD1, MYOD1, BGLAP, EPAS1, ELL, CREBBP, YWHAB, TLE1, WBP11, NRIP1, ERCC6, HIF1A, NKX2-1, PAF1, PARP1, TCF3, CHD4, PITX2	158	555	12782	2.76951	0.0422466	0.00716834	0.20803
GOTERM_CC_FAT	GO:0070013~intracellular organelle lumen	40	23.6686	0.0001727	ING5, MYOD1, TAF1C, MVD, ELL, MRPS12, NFKB1, WBP11, NR3C1, GHRHR, ZNF174, STAT6, ERCC6, RTF1, NKX2-1, BAZ2A, TCF3, CHD4, PITX2, FH, BRD1, NUP153, BGLAP, CEBPB, EPAS1, CREBBP, YWHAB, ACTN1, TLE1, NRIP1, HAGH, CCND1, HIF1A, UBTF, C1QBP, SMARCA5, PAF1, ASNA1, PARP1, SMARCA2	158	1779	12782	1.81897	0.0460567	0.00671323	0.227219
GOTERM_CC_FAT	GO:0016585~chromatin remodeling complex	7	4.14201	0.00023138	SMARCA5, ESR1, ASF1A, BAZ2A, SMARCA2, CHD4, NRIP1	158	71	12782	7.97593	0.06122	0.00786567	0.304315
GOTERM_CC_FAT	GO:0044421~extracellular region part	26	15.3846	0.000266909	FGF6, C3, IL6ST, COL3A1, CLU, IL13, CXCL12, ADA, VCAM1, NOV, PLAT, MUC2, BGLAP, GNRH1, LY96, IL7, MMP14, FURIN, ANXA2, GRP, LEP, PPBP, SCGB1D2, COL1A2, SELE, VLDLR	158	960	12782	2.19101	0.0702839	0.00806464	0.350968
GOTERM_CC_FAT	GO:0000267~cell fraction	27	15.9763	0.0006929	CYP3A4, CYP51A1, CYP2B6, SLC6A3, SNCA, IL13, OAS2, GHRHR, CYP3A43, TNFRSF1B, ERCC6, KRAS, ITCH, SELPLG, ANKRA2, GNRH1, CCKBR, CYP2C9, PTPN11, ANXA2, CAPN1, GCG, IKBKB, ASNA1, MERTK, UGT2B7, VLDLR	158	1083	12782	2.01687	0.172402	0.0187448	0.908759
GOTERM_CC_FAT	GO:0005667~transcription factor complex	10	5.91716	0.0011422	MYOD1, BGLAP, HIF1A, EPAS1, CREBBP, NKX2-1, TLE1, PARP1, TCF3, PITX2	158	210	12782	3.85232	0.268017	0.027965	1.49394
GOTERM_CC_FAT	GO:0031253~cell projection membrane	6	3.5503	0.00119691	BBS4, BBS2, BBS9, ITGA8, ADAM17, PDZK1	158	65	12782	7.46758	0.278881	0.0268781	1.56498
GOTERM_CC_FAT	GO:0009986~cell surface	13	7.69231	0.00121706	FGFR2, CYP3A4, SELL, IL6ST, KLRK1, TLR4, IL7R, FURIN, GHRHR, ADA, VCAM1, ITGAX, ADAM17	158	348	12782	3.02208	0.282842	0.0252495	1.59113
GOTERM_CC_FAT	GO:0034464~BBSome	3	1.77515	0.00302333	BBS4, BBS2, BBS9	158	7	12782	34.6709	0.562474	0.0573349	3.90949
GOTERM_CC_FAT	GO:0060170~cilium membrane	3	1.77515	0.00399867	BBS4, BBS2, BBS9	158	8	12782	30.337	0.665067	0.0703263	5.14026
GOTERM_CC_FAT	GO:0009897~external side of plasma membrane	8	4.73373	0.00499314	VCAM1, ITGAX, IL6ST, SELL, KLRK1, TLR4, IL7R, ADA	158	170	12782	3.807	0.745013	0.0818633	6.38017
GOTERM_CC_FAT	GO:0045121~membrane raft	7	4.14201	0.00839403	DLC1, TNFRSF1B, KRAS, ADAM17, TLR4, FURIN, SELE	158	143	12782	3.96008	0.899866	0.126605	10.5081
GOTERM_CC_FAT	GO:0005576~extracellular region	37	21.8935	0.011012	FGF6, FGFR2, NRTN, IL6ST, C3, CLU, COL3A1, IL13, GAST, IL7R, CXCL12, ADA, SPINK7, NOV, VCAM1, TNFRSF1B, FGF4, PLAT, MUC2, BGLAP, NTF3, GNRH1, IL7, LY96, ARTN, ACTN1, MMP14, FURIN, ANXA2, LEP, GRP, GCG, PPBP, SCGB1D2, COL1A2, SELE, VLDLR	158	2010	12782	1.48918	0.951342	0.154596	13.5704
GOTERM_CC_FAT	GO:0042995~cell projection	17	10.0592	0.0117452	BBS4, ADCY2, BBS9, SNCA, ESR1, ACTN1, MYOZ1, ADA, VCAM1, NOV, BBS2, SMO, HIF1A, ITGA8, ADAM17, MERTK, PDZK1	158	697	12782	1.97314	0.960261	0.156132	14.4106
GOTERM_CC_FAT	GO:0005626~insoluble fraction	19	11.2426	0.0146675	CYP3A4, ANKRA2, CCKBR, CYP51A1, CYP2C9, CYP2B6, SLC6A3, SNCA, OAS2, GHRHR, CAPN1, CYP3A43, TNFRSF1B, KRAS, ITCH, IKBKB, SELPLG, UGT2B7, VLDLR	158	839	12782	1.83203	0.982294	0.182655	17.6846
GOTERM_CC_FAT	GO:0008023~transcription elongation factor complex	3	1.77515	0.0201628	ERCC6, ELL, PAF1	158	18	12782	13.4831	0.996154	0.232637	23.53
GOTERM_CC_FAT	GO:0005829~cytosol	26	15.3846	0.020244	MVD, TBK1, PPARG, SNCA, RPL27A, NFKB1, NR3C1, MAPKAPK2, ADA, GPX1, TICAM1, SHC1, CAT, RPS23, NPLOC4, ANKRA2, CKAP5, YWHAB, PTPN11, CCND1, MAD2L1, PLCG1, RPS12, IDI1, VPS28, IKBKB	158	1330	12782	1.58148	0.99624	0.224143	23.6134
GOTERM_CC_FAT	GO:0005624~membrane fraction	18	10.6509	0.021019	CYP3A4, CCKBR, ANKRA2, CYP51A1, CYP2C9, CYP2B6, SLC6A3, SNCA, OAS2, GHRHR, CYP3A43, TNFRSF1B, KRAS, ITCH, IKBKB, SELPLG, UGT2B7, VLDLR	158	809	12782	1.79997	0.996971	0.222869	24.4055
GOTERM_CC_FAT	GO:0044463~cell projection part	8	4.73373	0.0254662	BBS4, BBS2, BBS9, ITGA8, ESR1, ADAM17, PDZK1, ADA	158	234	12782	2.76577	0.999126	0.254299	28.8053
GOTERM_CC_FAT	GO:0005792~microsome	8	4.73373	0.0270505	CYP3A43, CYP3A4, CYP51A1, CYP2C9, CYP2B6, OAS2, IKBKB, UGT2B7	158	237	12782	2.73076	0.999439	0.258782	30.3148
GOTERM_CC_FAT	GO:0042598~vesicular fraction	8	4.73373	0.031006	CYP3A43, CYP3A4, CYP51A1, CYP2C9, CYP2B6, OAS2, IKBKB, UGT2B7	158	244	12782	2.65242	0.999816	0.281591	33.9551
GOTERM_CC_FAT	GO:0005886~plasma membrane	58	34.3195	0.0394635	DLC1, FGF6, ADCY2, IL6ST, SLC6A3, SNCA, SLC7A8, TLR4, VIPR1, FAM57A, GHRHR, TMEM173, AGTR2, SHC1, CAT, KCNQ1, CCKBR, LY96, ESR1, FBLIM1, ACTN1, CTNNA1, MMP14, BBS2, C1QBP, CD81, SIGLEC7, COL1A2, ADAM17, FGFR2, BBS4, BBS9, KLRK1, IL7R, ADA, VCAM1, TNFRSF1B, KRAS, ITGAX, IL10RA, SELPLG, CR2, NTF3, SELL, FURIN, GABARAP, FZD6, ANXA2, CAPN1, SLC4A11, PLCG1, ITGA8, PTCH1, MERTK, VPS28, SELE, PDZK1, VLD…	158	3777	12782	1.24229	0.999983	0.334427	41.1569
GOTERM_CC_FAT	GO:0031514~motile secondary cilium	2	1.18343	0.0482393	BBS4, BBS2	158	4	12782	40.4494	0.999999	0.382488	47.8571
GOTERM_CC_FAT	GO:0042383~sarcolemma	4	2.36686	0.049235	FGF6, ESR1, KCNQ1, ANXA2	158	67	12782	4.82978	0.999999	0.378293	48.5709
GOTERM_CC_FAT	GO:0043235~receptor complex	5	2.95858	0.0546027	ITGAX, LY96, IL6ST, ITGA8, TLR4	158	116	12782	3.48701	1	0.400084	52.2664
GOTERM_CC_FAT	GO:0046696~lipopolysaccharide receptor complex	2	1.18343	0.0599334	LY96, TLR4	158	5	12782	32.3595	1	0.41974	55.6922
GOTERM_CC_FAT	GO:0044459~plasma membrane part	36	21.3018	0.0602273	DLC1, BBS4, IL6ST, SLC6A3, BBS9, SLC7A8, KLRK1, TLR4, VIPR1, IL7R, ADA, VCAM1, AGTR2, KRAS, ITGAX, SHC1, SELPLG, KCNQ1, CCKBR, SELL, ESR1, FBLIM1, ACTN1, MMP14, CTNNA1, FZD6, BBS2, SLC4A11, ITGA8, SIGLEC7, CD81, ADAM17, PTCH1, MERTK, PDZK1, SELE	158	2203	12782	1.32199	1	0.411359	55.8743
GOTERM_CC_FAT	GO:0042175~nuclear envelope-endoplasmic reticulum network	8	4.73373	0.061062	CYP3A4, NPLOC4, DERL1, CYP51A1, CYP2C9, CYP2B6, FURIN, GHRHR	158	284	12782	2.27884	1	0.40621	56.3877
GOTERM_CC_FAT	GO:0005929~cilium	5	2.95858	0.0745189	BBS4, SMO, BBS2, BBS9, MERTK	158	129	12782	3.13561	1	0.463028	63.939
GOTERM_CC_FAT	GO:0070776~MOZ/MORF histone acetyltransferase complex	2	1.18343	0.0828948	ING5, BRD1	158	7	12782	23.1139	1	0.490822	68.0086
GOTERM_CC_FAT	GO:0031143~pseudopodium	2	1.18343	0.0828948	ACTN1, MYOZ1	158	7	12782	23.1139	1	0.490822	68.0086
GOTERM_CC_FAT	GO:0070775~H3 histone acetyltransferase complex	2	1.18343	0.0828948	ING5, BRD1	158	7	12782	23.1139	1	0.490822	68.0086
GOTERM_CC_FAT	GO:0031093~platelet alpha granule lumen	3	1.77515	0.090105	PPBP, CLU, ACTN1	158	41	12782	5.91942	1	0.511328	71.1672
GOTERM_CC_FAT	GO:0005625~soluble fraction	8	4.73373	0.0912612	GCG, ERCC6, GNRH1, IL13, MERTK, ASNA1, PTPN11, ANXA2	158	313	12782	2.0677	1	0.506431	71.6461
GOTERM_CC_FAT	GO:0005815~microtubule organizing center	7	4.14201	0.091833	BBS4, BBS2, MAD2L1, CKAP5, BBS9, PPP4C, LATS1	158	253	12782	2.2383	1	0.499443	71.8801
GOTERM_MF_FAT	GO:0019838~growth factor binding	9	5.32544	2.58781e-05	NOV, NTF3, IL6ST, IL10RA, COL3A1, COL1A2, IL7R, FURIN, GHRHR	149	105	12983	7.46865	0.0118847	0.0118847	0.036845
GOTERM_MF_FAT	GO:0008134~transcription factor binding	18	10.6509	7.53364e-05	MYOD1, BGLAP, EPAS1, CREBBP, PPARG, YWHAB, HIRA, TLE1, ARNT, NRIP1, HIF1A, NEUROD1, PARP1, TCF3, SMARCA2, CHD4, NR5A1, PITX2	149	513	12983	3.05734	0.0342079	0.0172528	0.107228
GOTERM_MF_FAT	GO:0003705~RNA polymerase II transcription factor activity, enhancer binding	6	3.5503	7.57902e-05	MYOD1, HIF1A, CEBPB, EPAS1, NKX2-1, ARNT	149	39	12983	13.4053	0.0344104	0.0116043	0.107873
GOTERM_MF_FAT	GO:0008083~growth factor activity	10	5.91716	9.34397e-05	NOV, LEP, FGF6, NRTN, PPBP, NTF3, IL7, ARTN, CXCL12, FGF4	149	161	12983	5.41206	0.0422525	0.0107348	0.132979
GOTERM_MF_FAT	GO:0016563~transcription activator activity	15	8.87574	0.00024649	MYOD1, BGLAP, CEBPB, EPAS1, CREBBP, PPARG, ARNT, NRIP1, SMARCA5, NEUROD1, NKX2-1, IKBKB, TCF3, SMARCA2, NR5A1	149	410	12983	3.18784	0.107646	0.022521	0.350436
GOTERM_MF_FAT	GO:0030528~transcription regulator activity	33	19.5266	0.000363888	MYOD1, TAF1C, LMO1, ELL, PPARG, HIRA, SPI1, NFKB1, NR3C1, ZNF174, ARNT, STAT6, ERCC6, SNF8, NKX2-1, BAZ2A, TCF3, PITX2, BGLAP, CEBPB, EPAS1, CREBBP, YWHAB, ESR1, TLE1, NRIP1, HIF1A, UBTF, SMARCA5, NEUROD1, IKBKB, SMARCA2, NR5A1	149	1512	12983	1.90174	0.15477	0.0276354	0.516941
GOTERM_MF_FAT	GO:0032403~protein complex binding	10	5.91716	0.000408418	VCAM1, CCND1, ERCC6, SLC6A3, COL3A1, YWHAB, ADAM17, ACTN1, SHC1, PTPN11	149	196	12983	4.44562	0.171988	0.0266009	0.580031
GOTERM_MF_FAT	GO:0003702~RNA polymerase II transcription factor activity	10	5.91716	0.00192105	TAF1C, MYOD1, HIF1A, CEBPB, EPAS1, SNF8, SMARCA5, NKX2-1, NEUROD1, ARNT	149	244	12983	3.57107	0.588678	0.105104	2.70111
GOTERM_MF_FAT	GO:0043565~sequence-specific DNA binding	16	9.46746	0.00391634	MYOD1, CEBPB, EPAS1, PPARG, SPI1, ESR1, NFKB1, NR3C1, ARNT, STAT6, HIF1A, NKX2-1, NEUROD1, TCF3, NR5A1, PITX2	149	607	12983	2.29678	0.83682	0.182442	5.43469
GOTERM_MF_FAT	GO:0016712~oxidoreductase activity, acting on paired donors, with incorporation or reduction of molecular oxygen, reduced flavin or flavoprotein as one donor, and incorporation of one atom of oxygen	4	2.36686	0.00470365	CYP3A43, CYP3A4, CYP2C9, CYP2B6	149	30	12983	11.6179	0.886757	0.195731	6.49353
GOTERM_MF_FAT	GO:0003712~transcription cofactor activity	11	6.50888	0.00867719	MYOD1, BGLAP, EPAS1, CREBBP, YWHAB, HIRA, TLE1, SMARCA2, ARNT, NR5A1, NRIP1	149	363	12983	2.64043	0.982161	0.30652	11.6713
GOTERM_MF_FAT	GO:0046983~protein dimerization activity	14	8.28402	0.00903861	CR2, CEBPB, MVD, EPAS1, IL6ST, PPARG, NFKB1, ARNT, HIF1A, MAD2L1, NEUROD1, CAT, IKBKB, TCF3	149	542	12983	2.2507	0.984927	0.295008	12.1288
GOTERM_MF_FAT	GO:0046982~protein heterodimerization activity	8	4.73373	0.00979458	HIF1A, CEBPB, EPAS1, PPARG, NEUROD1, IKBKB, TCF3, ARNT	149	208	12983	3.35132	0.989405	0.295171	13.0786
GOTERM_MF_FAT	GO:0003713~transcription coactivator activity	8	4.73373	0.0113345	MYOD1, BGLAP, EPAS1, CREBBP, SMARCA2, ARNT, NR5A1, NRIP1	149	214	12983	3.25735	0.994838	0.313518	14.9839
GOTERM_MF_FAT	GO:0020037~heme binding	6	3.5503	0.0124381	CYP3A43, CYP3A4, CYP51A1, CYP2C9, CYP2B6, CAT	149	121	12983	4.32071	0.996919	0.319888	16.3253
GOTERM_MF_FAT	GO:0042393~histone binding	4	2.36686	0.0136669	SNCA, SMARCA5, ASF1A, BAZ2A	149	44	12983	7.92129	0.998267	0.327904	17.7958
GOTERM_MF_FAT	GO:0003700~transcription factor activity	20	11.8343	0.0149375	MYOD1, LMO1, CEBPB, EPAS1, PPARG, CREBBP, SPI1, ESR1, HIRA, NFKB1, NR3C1, ARNT, ZNF174, STAT6, HIF1A, NKX2-1, NEUROD1, TCF3, PITX2, NR5A1	149	975	12983	1.78737	0.999044	0.335693	19.2909
GOTERM_MF_FAT	GO:0046906~tetrapyrrole binding	6	3.5503	0.0160293	CYP3A43, CYP3A4, CYP51A1, CYP2C9, CYP2B6, CAT	149	129	12983	4.05275	0.999428	0.339495	20.5555
GOTERM_MF_FAT	GO:0003707~steroid hormone receptor activity	4	2.36686	0.0182466	PPARG, ESR1, NR3C1, NR5A1	149	49	12983	7.113	0.999798	0.360954	23.0672
GOTERM_MF_FAT	GO:0005506~iron ion binding	9	5.32544	0.0248045	CYP3A43, CYP3A4, CYP51A1, CYP2C9, CYP2B6, SNCA, CAT, PPP4C, KDM4D	149	308	12983	2.54613	0.999991	0.44022	30.0702
GOTERM_MF_FAT	GO:0010843~promoter binding	4	2.36686	0.0271402	ESR1, NKX2-1, NFKB1, TCF3	149	57	12983	6.11468	0.999997	0.45411	32.4179
GOTERM_MF_FAT	GO:0004879~ligand-dependent nuclear receptor activity	4	2.36686	0.0283877	PPARG, ESR1, NR3C1, NR5A1	149	58	12983	6.00926	0.999998	0.453799	33.6415
GOTERM_MF_FAT	GO:0003682~chromatin binding	6	3.5503	0.0285642	ERCC6, HIRA, SMARCA5, TLE1, ASF1A, CHD4	149	150	12983	3.48537	0.999998	0.441289	33.813
GOTERM_MF_FAT	GO:0005178~integrin binding	4	2.36686	0.0296653	VCAM1, COL3A1, ADAM17, ACTN1	149	59	12983	5.90741	0.999999	0.439933	34.8733
GOTERM_MF_FAT	GO:0003701~RNA polymerase I transcription factor activity	2	1.18343	0.0338128	TAF1C, UBTF	149	3	12983	58.0895	1	0.470419	38.7271
GOTERM_MF_FAT	GO:0005179~hormone activity	5	2.95858	0.0349506	LEP, GRP, GCG, GNRH1, GAST	149	108	12983	4.03399	1	0.468556	39.7467
GOTERM_MF_FAT	GO:0019899~enzyme binding	12	7.10059	0.0368807	CCND1, HIF1A, EPAS1, YWHAB, TLR4, FURIN, SELE, LATS1, PTPN11, ANXA2, NR5A1, NRIP1	149	523	12983	1.99926	1	0.474288	41.4403
GOTERM_MF_FAT	GO:0050544~arachidonic acid binding	2	1.18343	0.0448294	SNCA, PPARG	149	4	12983	43.5671	1	0.530824	47.9589
GOTERM_MF_FAT	GO:0030544~Hsp70 protein binding	2	1.18343	0.0448294	MVD, SNCA	149	4	12983	43.5671	1	0.530824	47.9589
GOTERM_MF_FAT	GO:0048406~nerve growth factor binding	2	1.18343	0.0557212	NTF3, FURIN	149	5	12983	34.8537	1	0.598837	55.8003
GOTERM_MF_FAT	GO:0001875~lipopolysaccharide receptor activity	2	1.18343	0.0557212	LY96, TLR4	149	5	12983	34.8537	1	0.598837	55.8003
GOTERM_MF_FAT	GO:0043425~bHLH transcription factor binding	2	1.18343	0.0664897	CREBBP, TCF3	149	6	12983	29.0447	1	0.653395	62.4606
GOTERM_MF_FAT	GO:0050543~icosatetraenoic acid binding	2	1.18343	0.0664897	SNCA, PPARG	149	6	12983	29.0447	1	0.653395	62.4606
GOTERM_MF_FAT	GO:0050542~icosanoid binding	2	1.18343	0.0664897	SNCA, PPARG	149	6	12983	29.0447	1	0.653395	62.4606
GOTERM_MF_FAT	GO:0008289~lipid binding	10	5.91716	0.0721899	CYP3A4, SELL, SNCA, PPARG, ESR1, SHC1, NR3C1, VPS36, ANXA2, NR5A1	149	450	12983	1.93632	1	0.672633	65.5961
GOTERM_MF_FAT	GO:0004386~helicase activity	5	2.95858	0.0763894	DDX17, ERCC6, SMARCA5, SMARCA2, CHD4	149	140	12983	3.11194	1	0.682498	67.7484
GOTERM_MF_FAT	GO:0051428~peptide hormone receptor binding	2	1.18343	0.0771362	LEP, PTPN11	149	7	12983	24.8955	1	0.674968	68.1178
GOTERM_MF_FAT	GO:0017166~vinculin binding	2	1.18343	0.0771362	ACTN1, CTNNA1	149	7	12983	24.8955	1	0.674968	68.1178
GOTERM_MF_FAT	GO:0035035~histone acetyltransferase binding	2	1.18343	0.0771362	HIF1A, EPAS1	149	7	12983	24.8955	1	0.674968	68.1178
GOTERM_MF_FAT	GO:0005138~interleukin-6 receptor binding	2	1.18343	0.0771362	IL6ST, ADAM17	149	7	12983	24.8955	1	0.674968	68.1178
GOTERM_MF_FAT	GO:0051427~hormone receptor binding	4	2.36686	0.079193	LEP, PPARG, PTPN11, NRIP1	149	88	12983	3.96065	1	0.674077	69.1148
GOTERM_MF_FAT	GO:0042277~peptide binding	6	3.5503	0.0826894	GPX1, AGTR2, CCKBR, SLC7A8, FURIN, GHRHR	149	203	12983	2.5754	1	0.679951	70.7435
GOTERM_MF_FAT	GO:0019825~oxygen binding	3	1.77515	0.0860949	CYP3A4, CYP2C9, CYP2B6	149	43	12983	6.07913	1	0.685058	72.2528
GOTERM_MF_FAT	GO:0043121~neurotrophin binding	2	1.18343	0.0876621	NTF3, FURIN	149	8	12983	21.7836	1	0.681958	72.9227
GOTERM_MF_FAT	GO:0043274~phospholipase binding	2	1.18343	0.0876621	SELE, PTPN11	149	8	12983	21.7836	1	0.681958	72.9227
GOTERM_MF_FAT	GO:0001848~complement binding	2	1.18343	0.0876621	CR2, C1QBP	149	8	12983	21.7836	1	0.681958	72.9227
GOTERM_MF_FAT	GO:0046965~retinoid X receptor binding	2	1.18343	0.0876621	PPARG, NRIP1	149	8	12983	21.7836	1	0.681958	72.9227
GOTERM_MF_FAT	GO:0042803~protein homodimerization activity	8	4.73373	0.0877164	MAD2L1, CEBPB, CR2, MVD, IL6ST, NFKB1, CAT, TCF3	149	334	12983	2.08705	1	0.672461	72.9457
GOTERM_MF_FAT	GO:0046332~SMAD binding	3	1.77515	0.0965615	CREBBP, COL3A1, COL1A2	149	46	12983	5.68267	1	0.699691	76.4505
